# Supplementary material for: How to normalize metatranscriptomic count data for differential expression analysis
Source: PeerJ. 2017 Oct 17;5:e3859. doi: 10.7717/peerj.3859 (PMC5649605; doi:10.7717/peerj.3859)
Supplement: File S5 [file peerj-05-3859-s005.xlsx]

## Sheet: Pfam
PF00004
PF00005
PF00006
PF00011
PF00012
PF00013
PF00023
PF00027
PF00034
PF00035
PF00037
PF00041
PF00044
PF00056
PF00069
PF00072
PF00075
PF00076
PF00078
PF00079
PF00080
PF00081
PF00082
PF00083
PF00085
PF00089
PF00091
PF00092
PF00106
PF00107
PF00109
PF00111
PF00112
PF00113
PF00117
PF00118
PF00119
PF00120
PF00121
PF00122
PF00126
PF00128
PF00132
PF00133
PF00135
PF00137
PF00140
PF00144
PF00145
PF00146
PF00148
PF00149
PF00150
PF00152
PF00154
PF00155
PF00156
PF00158
PF00160
PF00162
PF00163
PF00164
PF00165
PF00166
PF00171
PF00175
PF00176
PF00177
PF00180
PF00181
PF00183
PF00185
PF00186
PF00188
PF00190
PF00196
PF00198
PF00199
PF00202
PF00203
PF00204
PF00205
PF00206
PF00207
PF00208
PF00209
PF00210
PF00213
PF00215
PF00216
PF00218
PF00221
PF00224
PF00226
PF00230
PF00231
PF00232
PF00237
PF00238
PF00239
PF00245
PF00246
PF00248
PF00251
PF00252
PF00253
PF00254
PF00255
PF00258
PF00265
PF00266
PF00268
PF00269
PF00270
PF00271
PF00275
PF00276
PF00278
PF00281
PF00282
PF00285
PF00288
PF00289
PF00290
PF00291
PF00293
PF00294
PF00295
PF00297
PF00298
PF00300
PF00301
PF00302
PF00303
PF00306
PF00308
PF00309
PF00310
PF00311
PF00312
PF00313
PF00317
PF00318
PF00326
PF00327
PF00328
PF00329
PF00330
PF00331
PF00333
PF00334
PF00338
PF00342
PF00343
PF00344
PF00346
PF00347
PF00348
PF00349
PF00350
PF00355
PF00356
PF00358
PF00359
PF00361
PF00364
PF00365
PF00366
PF00367
PF00370
PF00374
PF00375
PF00376
PF00378
PF00380
PF00381
PF00383
PF00384
PF00388
PF00389
PF00390
PF00391
PF00392
PF00393
PF00398
PF00401
PF00403
PF00408
PF00410
PF00411
PF00413
PF00416
PF00420
PF00425
PF00430
PF00436
PF00437
PF00438
PF00440
PF00441
PF00444
PF00448
PF00453
PF00455
PF00456
PF00459
PF00462
PF00464
PF00465
PF00466
PF00467
PF00468
PF00471
PF00472
PF00474
PF00475
PF00476
PF00478
PF00479
PF00480
PF00481
PF00482
PF00483
PF00484
PF00485
PF00486
PF00488
PF00490
PF00491
PF00496
PF00497
PF00498
PF00499
PF00501
PF00507
PF00512
PF00515
PF00520
PF00521
PF00528
PF00529
PF00532
PF00533
PF00534
PF00535
PF00542
PF00543
PF00545
PF00549
PF00550
PF00551
PF00557
PF00561
PF00562
PF00563
PF00565
PF00570
PF00571
PF00572
PF00573
PF00574
PF00575
PF00578
PF00579
PF00580
PF00581
PF00582
PF00583
PF00584
PF00586
PF00587
PF00588
PF00589
PF00590
PF00591
PF00593
PF00595
PF00596
PF00623
PF00625
PF00633
PF00636
PF00639
PF00648
PF00654
PF00657
PF00662
PF00664
PF00665
PF00668
PF00670
PF00672
PF00673
PF00675
PF00676
PF00677
PF00679
PF00682
PF00684
PF00686
PF00687
PF00689
PF00690
PF00691
PF00692
PF00694
PF00696
PF00697
PF00698
PF00701
PF00703
PF00704
PF00707
PF00708
PF00709
PF00710
PF00712
PF00717
PF00722
PF00723
PF00724
PF00728
PF00730
PF00731
PF00733
PF00742
PF00745
PF00746
PF00749
PF00750
PF00753
PF00754
PF00756
PF00759
PF00763
PF00764
PF00766
PF00768
PF00772
PF00781
PF00793
PF00795
PF00800
PF00801
PF00805
PF00809
PF00814
PF00815
PF00817
PF00825
PF00828
PF00829
PF00830
PF00831
PF00834
PF00842
PF00847
PF00849
PF00852
PF00854
PF00857
PF00860
PF00861
PF00871
PF00872
PF00873
PF00874
PF00877
PF00881
PF00882
PF00884
PF00885
PF00886
PF00889
PF00890
PF00891
PF00892
PF00893
PF00899
PF00902
PF00903
PF00905
PF00908
PF00909
PF00912
PF00916
PF00919
PF00920
PF00923
PF00924
PF00925
PF00926
PF00929
PF00930
PF00932
PF00933
PF00936
PF00939
PF00941
PF00950
PF00953
PF00958
PF00959
PF00962
PF00970
PF00977
PF00982
PF00984
PF00986
PF00988
PF00989
PF00990
PF00994
PF00999
PF01000
PF01008
PF01011
PF01012
PF01016
PF01018
PF01022
PF01025
PF01026
PF01029
PF01032
PF01035
PF01037
PF01039
PF01040
PF01041
PF01042
PF01043
PF01047
PF01048
PF01050
PF01053
PF01055
PF01058
PF01061
PF01063
PF01066
PF01070
PF01071
PF01074
PF01075
PF01076
PF01077
PF01078
PF01081
PF01084
PF01087
PF01095
PF01098
PF01103
PF01106
PF01112
PF01113
PF01116
PF01118
PF01119
PF01120
PF01121
PF01128
PF01131
PF01132
PF01134
PF01136
PF01138
PF01139
PF01144
PF01145
PF01149
PF01155
PF01156
PF01165
PF01168
PF01170
PF01171
PF01174
PF01175
PF01176
PF01177
PF01180
PF01182
PF01183
PF01187
PF01189
PF01192
PF01193
PF01195
PF01196
PF01197
PF01202
PF01204
PF01205
PF01206
PF01207
PF01208
PF01209
PF01210
PF01212
PF01219
PF01220
PF01223
PF01225
PF01226
PF01227
PF01228
PF01230
PF01232
PF01235
PF01238
PF01242
PF01243
PF01244
PF01245
PF01248
PF01250
PF01252
PF01253
PF01255
PF01256
PF01258
PF01259
PF01261
PF01262
PF01263
PF01264
PF01266
PF01268
PF01272
PF01276
PF01281
PF01288
PF01289
PF01292
PF01293
PF01297
PF01300
PF01301
PF01314
PF01315
PF01316
PF01321
PF01325
PF01326
PF01327
PF01330
PF01336
PF01337
PF01343
PF01344
PF01345
PF01346
PF01348
PF01351
PF01364
PF01367
PF01368
PF01370
PF01371
PF01379
PF01380
PF01381
PF01384
PF01385
PF01386
PF01396
PF01402
PF01406
PF01408
PF01409
PF01411
PF01416
PF01418
PF01420
PF01424
PF01425
PF01427
PF01430
PF01431
PF01432
PF01433
PF01434
PF01435
PF01436
PF01443
PF01450
PF01451
PF01455
PF01458
PF01464
PF01467
PF01470
PF01471
PF01472
PF01473
PF01475
PF01476
PF01478
PF01479
PF01487
PF01488
PF01493
PF01496
PF01497
PF01501
PF01502
PF01503
PF01507
PF01509
PF01510
PF01512
PF01513
PF01515
PF01520
PF01522
PF01523
PF01527
PF01531
PF01541
PF01544
PF01545
PF01546
PF01547
PF01548
PF01551
PF01553
PF01554
PF01555
PF01556
PF01557
PF01558
PF01565
PF01566
PF01568
PF01569
PF01571
PF01575
PF01578
PF01580
PF01588
PF01590
PF01592
PF01594
PF01595
PF01596
PF01597
PF01609
PF01610
PF01612
PF01613
PF01614
PF01618
PF01619
PF01624
PF01625
PF01627
PF01628
PF01632
PF01634
PF01636
PF01637
PF01638
PF01640
PF01641
PF01642
PF01643
PF01645
PF01648
PF01649
PF01653
PF01654
PF01656
PF01658
PF01661
PF01663
PF01668
PF01676
PF01678
PF01680
PF01687
PF01693
PF01694
PF01695
PF01699
PF01702
PF01709
PF01713
PF01715
PF01717
PF01719
PF01725
PF01726
PF01728
PF01729
PF01734
PF01738
PF01740
PF01741
PF01743
PF01746
PF01750
PF01751
PF01755
PF01757
PF01758
PF01761
PF01765
PF01769
PF01773
PF01782
PF01783
PF01784
PF01790
PF01791
PF01795
PF01797
PF01799
PF01807
PF01808
PF01809
PF01810
PF01812
PF01813
PF01814
PF01817
PF01820
PF01823
PF01832
PF01833
PF01835
PF01841
PF01842
PF01844
PF01850
PF01855
PF01862
PF01863
PF01865
PF01867
PF01869
PF01872
PF01878
PF01880
PF01882
PF01883
PF01888
PF01890
PF01891
PF01894
PF01895
PF01902
PF01906
PF01909
PF01910
PF01914
PF01915
PF01923
PF01924
PF01925
PF01926
PF01928
PF01930
PF01934
PF01935
PF01936
PF01937
PF01938
PF01943
PF01944
PF01948
PF01955
PF01957
PF01958
PF01960
PF01963
PF01964
PF01965
PF01966
PF01967
PF01969
PF01975
PF01978
PF01979
PF01980
PF01985
PF01987
PF01988
PF01990
PF01991
PF01992
PF01996
PF02001
PF02012
PF02016
PF02018
PF02021
PF02026
PF02028
PF02033
PF02037
PF02055
PF02056
PF02065
PF02073
PF02074
PF02075
PF02080
PF02082
PF02086
PF02091
PF02092
PF02096
PF02110
PF02113
PF02127
PF02129
PF02130
PF02132
PF02133
PF02142
PF02146
PF02151
PF02152
PF02153
PF02156
PF02163
PF02169
PF02178
PF02190
PF02195
PF02219
PF02222
PF02224
PF02225
PF02229
PF02230
PF02237
PF02253
PF02254
PF02255
PF02256
PF02261
PF02272
PF02275
PF02277
PF02278
PF02283
PF02286
PF02287
PF02288
PF02302
PF02308
PF02310
PF02311
PF02317
PF02321
PF02322
PF02325
PF02329
PF02335
PF02347
PF02348
PF02350
PF02353
PF02355
PF02357
PF02358
PF02361
PF02367
PF02368
PF02371
PF02374
PF02378
PF02381
PF02384
PF02386
PF02388
PF02390
PF02397
PF02401
PF02403
PF02405
PF02416
PF02417
PF02421
PF02423
PF02424
PF02435
PF02436
PF02441
PF02445
PF02446
PF02447
PF02449
PF02452
PF02457
PF02463
PF02464
PF02469
PF02470
PF02472
PF02481
PF02482
PF02485
PF02486
PF02491
PF02492
PF02493
PF02494
PF02498
PF02502
PF02503
PF02504
PF02508
PF02511
PF02514
PF02515
PF02517
PF02518
PF02525
PF02527
PF02530
PF02534
PF02535
PF02537
PF02540
PF02541
PF02542
PF02544
PF02545
PF02547
PF02548
PF02550
PF02553
PF02554
PF02556
PF02557
PF02558
PF02559
PF02562
PF02563
PF02565
PF02566
PF02568
PF02569
PF02570
PF02571
PF02572
PF02574
PF02575
PF02576
PF02577
PF02578
PF02579
PF02580
PF02581
PF02583
PF02585
PF02586
PF02588
PF02589
PF02590
PF02591
PF02592
PF02595
PF02596
PF02597
PF02601
PF02602
PF02603
PF02604
PF02606
PF02607
PF02608
PF02609
PF02610
PF02614
PF02615
PF02616
PF02617
PF02618
PF02620
PF02622
PF02625
PF02627
PF02629
PF02630
PF02631
PF02632
PF02633
PF02635
PF02637
PF02638
PF02639
PF02643
PF02645
PF02646
PF02650
PF02652
PF02653
PF02654
PF02655
PF02657
PF02659
PF02660
PF02661
PF02662
PF02664
PF02666
PF02669
PF02670
PF02673
PF02674
PF02675
PF02677
PF02678
PF02683
PF02684
PF02686
PF02687
PF02689
PF02690
PF02698
PF02699
PF02702
PF02705
PF02706
PF02709
PF02719
PF02729
PF02730
PF02733
PF02734
PF02738
PF02739
PF02742
PF02743
PF02744
PF02746
PF02748
PF02749
PF02754
PF02767
PF02768
PF02769
PF02770
PF02771
PF02772
PF02773
PF02774
PF02775
PF02776
PF02777
PF02779
PF02780
PF02781
PF02782
PF02784
PF02785
PF02786
PF02787
PF02796
PF02800
PF02801
PF02806
PF02810
PF02811
PF02812
PF02817
PF02823
PF02824
PF02826
PF02829
PF02833
PF02836
PF02837
PF02838
PF02843
PF02844
PF02852
PF02861
PF02863
PF02866
PF02867
PF02870
PF02872
PF02873
PF02874
PF02875
PF02878
PF02879
PF02880
PF02881
PF02882
PF02884
PF02885
PF02887
PF02894
PF02896
PF02897
PF02899
PF02901
PF02903
PF02906
PF02910
PF02911
PF02912
PF02913
PF02915
PF02922
PF02926
PF02927
PF02929
PF02934
PF02938
PF02952
PF02954
PF02963
PF02965
PF02971
PF02976
PF02978
PF03006
PF03008
PF03009
PF03023
PF03030
PF03031
PF03033
PF03050
PF03051
PF03060
PF03061
PF03062
PF03063
PF03065
PF03073
PF03092
PF03099
PF03102
PF03109
PF03116
PF03118
PF03119
PF03120
PF03123
PF03129
PF03143
PF03144
PF03147
PF03150
PF03160
PF03167
PF03169
PF03173
PF03176
PF03180
PF03186
PF03193
PF03200
PF03205
PF03235
PF03237
PF03253
PF03255
PF03264
PF03266
PF03275
PF03279
PF03288
PF03309
PF03313
PF03315
PF03319
PF03321
PF03323
PF03328
PF03330
PF03331
PF03349
PF03352
PF03354
PF03358
PF03372
PF03374
PF03389
PF03400
PF03412
PF03413
PF03414
PF03415
PF03417
PF03418
PF03419
PF03422
PF03432
PF03435
PF03437
PF03442
PF03444
PF03446
PF03447
PF03448
PF03449
PF03450
PF03453
PF03454
PF03457
PF03458
PF03459
PF03460
PF03461
PF03462
PF03466
PF03471
PF03473
PF03477
PF03479
PF03480
PF03481
PF03483
PF03484
PF03485
PF03534
PF03544
PF03547
PF03548
PF03551
PF03553
PF03572
PF03575
PF03576
PF03577
PF03588
PF03590
PF03591
PF03592
PF03595
PF03598
PF03599
PF03600
PF03601
PF03605
PF03606
PF03609
PF03610
PF03611
PF03613
PF03616
PF03618
PF03625
PF03629
PF03630
PF03631
PF03632
PF03633
PF03636
PF03641
PF03648
PF03649
PF03652
PF03663
PF03668
PF03672
PF03690
PF03692
PF03702
PF03703
PF03704
PF03706
PF03711
PF03717
PF03719
PF03720
PF03721
PF03724
PF03725
PF03726
PF03727
PF03729
PF03733
PF03734
PF03738
PF03739
PF03740
PF03747
PF03749
PF03755
PF03764
PF03772
PF03773
PF03775
PF03776
PF03780
PF03781
PF03786
PF03787
PF03788
PF03793
PF03796
PF03799
PF03802
PF03806
PF03807
PF03808
PF03812
PF03814
PF03816
PF03819
PF03830
PF03837
PF03838
PF03840
PF03841
PF03845
PF03852
PF03853
PF03861
PF03862
PF03869
PF03880
PF03883
PF03894
PF03900
PF03928
PF03929
PF03932
PF03938
PF03946
PF03947
PF03948
PF03949
PF03950
PF03951
PF03952
PF03956
PF03960
PF03965
PF03976
PF03977
PF03979
PF03989
PF03992
PF03993
PF04002
PF04011
PF04014
PF04015
PF04018
PF04020
PF04023
PF04024
PF04025
PF04026
PF04028
PF04041
PF04055
PF04060
PF04069
PF04070
PF04071
PF04072
PF04073
PF04074
PF04079
PF04085
PF04087
PF04093
PF04095
PF04101
PF04127
PF04131
PF04138
PF04143
PF04166
PF04167
PF04170
PF04172
PF04173
PF04187
PF04198
PF04199
PF04203
PF04204
PF04205
PF04221
PF04224
PF04226
PF04227
PF04229
PF04230
PF04232
PF04233
PF04235
PF04237
PF04239
PF04245
PF04246
PF04253
PF04255
PF04261
PF04263
PF04265
PF04266
PF04277
PF04290
PF04294
PF04295
PF04296
PF04297
PF04298
PF04301
PF04304
PF04306
PF04309
PF04313
PF04321
PF04324
PF04326
PF04327
PF04336
PF04342
PF04343
PF04346
PF04355
PF04357
PF04371
PF04378
PF04383
PF04389
PF04390
PF04392
PF04397
PF04402
PF04404
PF04405
PF04413
PF04422
PF04432
PF04434
PF04439
PF04445
PF04448
PF04450
PF04452
PF04459
PF04461
PF04463
PF04464
PF04466
PF04468
PF04471
PF04472
PF04474
PF04480
PF04488
PF04519
PF04531
PF04536
PF04539
PF04542
PF04545
PF04551
PF04552
PF04556
PF04560
PF04561
PF04563
PF04565
PF04577
PF04586
PF04587
PF04607
PF04608
PF04613
PF04616
PF04630
PF04647
PF04657
PF04685
PF04715
PF04723
PF04754
PF04760
PF04773
PF04794
PF04816
PF04851
PF04854
PF04860
PF04865
PF04879
PF04883
PF04892
PF04898
PF04909
PF04916
PF04932
PF04952
PF04960
PF04961
PF04962
PF04963
PF04965
PF04970
PF04973
PF04977
PF04983
PF04984
PF04986
PF04991
PF04993
PF04994
PF04997
PF04998
PF05000
PF05015
PF05016
PF05017
PF05025
PF05031
PF05036
PF05043
PF05050
PF05063
PF05065
PF05066
PF05067
PF05089
PF05096
PF05099
PF05103
PF05105
PF05107
PF05117
PF05119
PF05124
PF05133
PF05135
PF05139
PF05140
PF05147
PF05164
PF05167
PF05168
PF05170
PF05173
PF05175
PF05188
PF05190
PF05191
PF05192
PF05193
PF05194
PF05195
PF05198
PF05201
PF05221
PF05222
PF05223
PF05239
PF05256
PF05257
PF05258
PF05272
PF05336
PF05343
PF05345
PF05362
PF05389
PF05402
PF05406
PF05426
PF05430
PF05437
PF05448
PF05488
PF05491
PF05496
PF05521
PF05523
PF05524
PF05525
PF05534
PF05544
PF05552
PF05569
PF05572
PF05576
PF05580
PF05582
PF05592
PF05593
PF05598
PF05635
PF05636
PF05649
PF05656
PF05670
PF05673
PF05681
PF05683
PF05684
PF05685
PF05686
PF05691
PF05693
PF05697
PF05698
PF05704
PF05708
PF05709
PF05711
PF05713
PF05717
PF05731
PF05738
PF05746
PF05762
PF05766
PF05816
PF05838
PF05857
PF05866
PF05869
PF05895
PF05896
PF05913
PF05922
PF05935
PF05958
PF05960
PF05970
PF05971
PF05973
PF05977
PF05979
PF05991
PF06018
PF06026
PF06032
PF06050
PF06054
PF06056
PF06071
PF06074
PF06082
PF06094
PF06100
PF06107
PF06114
PF06115
PF06123
PF06125
PF06130
PF06133
PF06134
PF06135
PF06144
PF06149
PF06152
PF06153
PF06160
PF06161
PF06165
PF06166
PF06177
PF06180
PF06182
PF06199
PF06202
PF06207
PF06210
PF06224
PF06245
PF06250
PF06257
PF06271
PF06280
PF06283
PF06293
PF06296
PF06321
PF06353
PF06379
PF06397
PF06406
PF06414
PF06415
PF06418
PF06421
PF06439
PF06445
PF06452
PF06458
PF06463
PF06470
PF06480
PF06496
PF06508
PF06537
PF06541
PF06560
PF06574
PF06580
PF06603
PF06605
PF06612
PF06628
PF06675
PF06686
PF06689
PF06695
PF06713
PF06723
PF06725
PF06733
PF06738
PF06739
PF06750
PF06772
PF06782
PF06792
PF06803
PF06808
PF06810
PF06824
PF06826
PF06827
PF06831
PF06832
PF06835
PF06838
PF06841
PF06854
PF06857
PF06866
PF06874
PF06889
PF06898
PF06902
PF06908
PF06912
PF06925
PF06930
PF06935
PF06940
PF06941
PF06949
PF06953
PF06961
PF06962
PF06964
PF06965
PF06968
PF06969
PF06970
PF06971
PF07005
PF07009
PF07022
PF07030
PF07075
PF07081
PF07083
PF07085
PF07090
PF07136
PF07155
PF07168
PF07171
PF07179
PF07228
PF07242
PF07244
PF07247
PF07261
PF07275
PF07282
PF07295
PF07302
PF07313
PF07314
PF07332
PF07352
PF07355
PF07364
PF07366
PF07371
PF07377
PF07385
PF07396
PF07432
PF07441
PF07450
PF07451
PF07454
PF07456
PF07463
PF07470
PF07475
PF07477
PF07478
PF07479
PF07486
PF07488
PF07494
PF07495
PF07497
PF07498
PF07499
PF07501
PF07503
PF07505
PF07508
PF07510
PF07516
PF07517
PF07520
PF07521
PF07523
PF07532
PF07537
PF07538
PF07549
PF07554
PF07555
PF07556
PF07561
PF07581
PF07582
PF07584
PF07602
PF07603
PF07610
PF07632
PF07638
PF07650
PF07653
PF07659
PF07660
PF07661
PF07662
PF07664
PF07669
PF07670
PF07676
PF07680
PF07681
PF07683
PF07685
PF07687
PF07690
PF07691
PF07693
PF07697
PF07698
PF07702
PF07703
PF07715
PF07719
PF07722
PF07724
PF07726
PF07728
PF07729
PF07730
PF07733
PF07739
PF07745
PF07748
PF07751
PF07784
PF07786
PF07804
PF07805
PF07811
PF07826
PF07831
PF07837
PF07853
PF07859
PF07863
PF07873
PF07875
PF07876
PF07881
PF07882
PF07883
PF07884
PF07885
PF07892
PF07905
PF07907
PF07927
PF07929
PF07934
PF07940
PF07943
PF07944
PF07947
PF07949
PF07959
PF07963
PF07969
PF07971
PF07973
PF07977
PF07980
PF07991
PF07992
PF07993
PF07994
PF08000
PF08002
PF08006
PF08011
PF08013
PF08019
PF08020
PF08029
PF08032
PF08124
PF08125
PF08206
PF08207
PF08212
PF08218
PF08220
PF08222
PF08230
PF08238
PF08239
PF08240
PF08241
PF08244
PF08245
PF08264
PF08274
PF08275
PF08278
PF08279
PF08281
PF08282
PF08291
PF08299
PF08305
PF08306
PF08307
PF08309
PF08323
PF08328
PF08331
PF08338
PF08340
PF08348
PF08352
PF08353
PF08357
PF08359
PF08367
PF08378
PF08388
PF08401
PF08402
PF08436
PF08439
PF08442
PF08443
PF08447
PF08448
PF08450
PF08455
PF08459
PF08463
PF08478
PF08481
PF08483
PF08485
PF08486
PF08497
PF08501
PF08502
PF08503
PF08522
PF08529
PF08530
PF08531
PF08532
PF08533
PF08534
PF08541
PF08543
PF08544
PF08545
PF08546
PF08645
PF08660
[truncated: 1,185 more rows]

## Sheet: BACCAC_13days
18242	1913	2777	3732
12567	782	2774	1629
18014	1697	4220	1814
0	0	0	0
7740	812	376	1181
4641	495	1870	822
182	0	0	0
496	31	51	154
69	0	35	0
322	37	101	19
1440	58	481	224
0	0	0	0
6985	335	470	425
10084	738	809	1386
0	0	0	0
56195	5918	11119	11021
204	12	96	0
1134	91	413	94
0	0	115	0
0	0	0	0
0	0	0	0
38694	11286	10887	2918
342	51	104	0
242	0	0	0
4724	478	477	602
0	0	0	0
741	171	507	239
966	260	75	76
2050	29	511	282
772	0	0	0
2124	329	893	119
1691	64	700	196
1947	175	560	0
5196	410	1189	694
16041	676	857	1016
6708	287	92	394
1197	169	461	152
13266	342	223	1155
1096	282	77	316
114107	12723	18709	6258
371	138	94	0
1954	187	461	149
2007	145	306	231
9494	1318	2156	2576
0	0	0	0
1020	43	145	56
5055	944	1380	1276
151	281	844	0
0	0	0	0
0	0	0	0
0	0	0	0
2048	734	894	643
0	0	0	0
7337	1192	1949	1072
461	193	37	336
15168	893	2079	2038
3220	67	98	305
3489	349	496	886
430	0	85	142
7919	943	628	1126
767	96	338	151
1382	127	140	69
0	0	0	0
211	2	0	0
6467	1026	1139	1192
4676	192	1155	403
357	106	362	219
766	53	133	292
3438	426	816	167
1400	101	86	109
2237	164	297	39
360	129	48	174
768	20	94	153
0	0	0	0
0	0	0	0
883	0	50	84
1279	202	0	120
0	0	0	0
1438	136	630	302
633	15	22	72
11423	1386	2023	1573
6530	615	612	329
4286	634	753	64
23137	2487	7634	2698
13232	572	2973	1318
858	332	488	0
5319	258	125	344
518	31	57	11
515	0	105	174
2233	318	338	223
0	0	0	0
0	0	0	0
949	190	0	0
6503	1441	1759	819
1649	101	173	78
1816	0	46	191
0	0	0	0
274	33	24	76
537	0	123	0
0	0	0	0
421	356	107	81
0	0	0	0
254	0	226	39
3573	1837	2604	597
1200	24	213	14
589	0	98	53
2842	334	258	671
284	0	0	42
784	44	121	29
150	0	0	11
5422	274	820	124
0	0	0	0
0	0	0	0
15789	1608	3198	1091
22478	2969	6088	1565
1696	284	553	393
103	0	10	0
1839	222	396	73
192	0	10	0
6858	403	0	116
5600	1226	1531	527
4363	426	1498	904
1589	451	808	494
231	115	98	15
2517	44	544	805
640	78	99	137
8018	396	297	362
1222	0	987	403
770	46	31	287
1459	222	17	179
1287	0	0	186
4605	417	364	295
0	0	0	0
40	74	283	0
3965	236	201	518
3299	26	288	65
955	166	710	0
24142	2374	927	3554
0	0	0	0
1523	92	216	185
0	0	0	0
0	0	0	0
2037	0	563	260
9383	1105	1704	991
96	26	27	7
0	0	0	0
917	208	648	31
26331	3104	2734	3398
0	0	0	0
224	138	53	65
1008	90	236	178
395	34	62	70
2176	174	340	463
6554	0	261	444
3023	0	0	196
917	208	648	31
338	0	0	99
1877	91	644	206
393	0	61	0
0	0	0	0
0	0	0	0
1174	0	54	430
0	0	0	0
0	0	0	0
576	385	1030	378
1901	770	139	296
8246	866	974	1254
54	0	0	0
0	0	0	0
1274	133	421	110
0	0	0	0
59	88	90	0
0	0	0	0
433	46	126	47
263	16	0	15
0	0	0	0
746	99	135	124
0	0	0	0
0	0	0	0
5107	1027	840	216
7325	85	1622	1005
13640	659	901	2439
1578	364	344	379
4470	335	976	482
440	0	0	0
0	0	0	0
14212	2550	1124	1826
3012	585	765	865
241	0	36	51
331	17	79	0
150	0	0	86
117	0	0	0
0	0	0	0
106	0	0	19
730	127	420	92
96	9	134	0
0	0	0	0
1132	0	197	226
420	0	110	0
1872	223	391	246
0	0	0	0
5036	389	1325	911
1685	88	306	193
0	0	0	0
3674	524	512	383
410	151	102	15
0	0	0	0
2814	334	391	1009
9580	256	731	969
1304	95	34	103
1234	57	197	229
2876	826	897	616
41	0	0	46
784	18	254	230
2079	0	37	618
0	0	86	0
3063	266	508	439
2003	176	388	227
2248	418	381	86
2549	216	110	399
0	0	0	0
0	0	0	0
2058	224	875	328
325	272	124	114
1626	254	639	193
1594	108	18	129
2256	115	771	877
0	0	0	0
0	0	0	0
0	0	0	0
1343	0	0	64
146	0	0	0
26	0	13	0
5037	609	2242	1413
0	0	0	0
60459	6102	12095	11454
1694	114	782	103
0	17	0	0
5576	937	735	1221
1021	423	0	854
82	0	0	84
0	0	0	0
1002	0	306	423
2207	118	796	244
3488	622	629	370
49	15	0	147
0	0	0	0
0	0	0	0
2125	441	488	150
2312	21	12	293
826	0	25	25
6002	998	2190	842
0	0	0	0
18996	995	1175	814
0	0	0	0
0	0	0	0
7806	406	577	642
5967	922	876	418
58	0	38	26
351	80	80	0
371	106	67	127
9615	1025	2449	1580
2849	209	589	261
2995	255	944	568
3539	229	654	386
40806	5849	5369	1997
1048	244	619	0
967	0	0	148
0	0	0	0
285	58	184	60
9270	1113	1232	785
793	143	0	57
4750	452	522	1196
388	188	0	0
149	0	0	0
33520	2084	5239	7874
0	0	0	0
68	51	182	86
19927	1397	3797	2234
14	0	129	0
0	98	0	0
0	0	0	0
2827	0	0	609
0	0	0	0
871	293	0	121
947	165	425	135
288	36	342	184
584	0	514	35
0	0	0	0
0	0	0	0
2482	453	502	655
5295	162	1474	111
192	0	10	0
9310	627	2527	1529
4686	189	311	196
60	0	31	0
20901	1352	4996	3397
3372	427	392	379
1559	678	777	226
1478	0	341	258
2206	222	142	188
475	252	0	208
475	252	0	208
39053	4330	8269	3671
303	16	33	8
24302	3052	2628	3237
22403	416	2518	1292
0	0	0	0
894	0	221	0
6061	983	1745	1596
59366	8912	14943	9506
0	0	0	0
707	22	0	173
0	0	0	0
2670	760	1821	723
2670	98	53	163
8087	1633	2914	1871
217	0	63	0
1319	760	785	406
0	0	0	0
122	364	62	165
33324	2929	5944	4550
0	98	0	0
240	64	97	84
3382	466	127	1026
2202	0	777	235
0	0	0	0
0	0	0	0
3622	240	97	487
1989	203	324	140
839	44	377	47
53016	5452	11888	9264
0	0	0	0
0	0	0	0
1368	175	630	403
439	151	0	93
1176	355	363	0
0	0	0	0
825	263	279	60
1640	121	393	53
220	0	217	0
2418	179	345	165
42	16	0	0
0	0	0	0
0	0	0	0
1971	202	198	305
707	32	135	233
354	0	0	198
956	0	250	105
8	0	33	0
1065	33	0	116
166	0	0	24
75	20	0	41
0	2	0	1
471	36	33	62
2560	46	190	815
0	0	0	0
6754	777	1063	604
0	0	0	0
1626	155	763	224
0	0	0	0
468	98	0	0
292	51	0	0
846	296	162	151
0	0	0	0
44797	4106	11553	6964
0	0	0	0
152	48	103	0
4832	388	349	448
0	0	0	0
9607	1446	2324	1560
74	0	25	5
492	0	115	0
2835	126	442	368
8247	815	1836	1718
0	0	0	0
892	154	47	0
0	0	0	0
225	0	0	69
80	0	0	0
174	38	0	22
4229	661	1997	1154
27	0	0	0
34	0	0	24
4736	217	236	947
0	0	0	0
1311	151	305	50
2236	236	0	101
1247	293	100	63
1580	294	266	463
695	0	257	24
695	0	257	24
195	14	40	30
4024	571	1212	709
557	36	394	186
13042	1013	2873	1556
0	0	0	0
152	56	116	204
0	0	0	0
40	75	62	0
0	0	226	98
14399	507	599	754
0	0	0	0
0	0	0	0
1691	64	700	196
72	81	73	28
36445	5926	11026	2386
264	24	267	0
11423	1386	2023	1573
972	169	198	228
5295	162	1474	111
0	0	0	0
216	0	63	0
4278	435	691	226
3292	61	154	193
0	0	0	0
0	0	0	0
1981	418	791	107
5165	163	594	856
1343	282	356	134
0	0	0	0
566	259	103	201
19	0	0	0
287	86	0	196
76	38	0	0
133	0	14	72
1050	209	403	216
5452	1760	1476	389
89	0	45	0
286	0	0	0
508	132	218	86
4855	1255	2476	255
2411	282	208	141
1140	98	416	314
0	0	0	0
631	215	182	0
12939	217	2670	1345
63	22	245	92
0	0	0	0
638	0	156	215
0	47	0	0
0	0	0	0
670	71	97	73
0	0	0	0
155	0	0	40
84	0	0	0
0	0	0	0
291	0	74	0
17	0	0	0
27	20	111	17
0	0	0	0
0	32	133	0
318	0	324	22
8011	1243	2134	692
0	0	0	0
0	0	0	0
707	28	58	103
5833	508	919	662
7449	1116	1176	1084
1191	142	339	366
6115	229	1510	646
31	0	0	47
198	0	0	0
4782	297	277	383
386	155	101	87
1134	141	384	0
1520	300	140	149
2988	238	1245	205
0	0	0	0
0	0	0	0
598	92	275	127
507	283	365	65
0	0	0	0
0	0	0	0
0	0	0	0
3362	145	309	866
589	0	337	170
582	72	195	0
0	0	0	0
0	0	0	0
0	16	0	4
147	0	86	16
1118	176	154	116
7473	733	1811	1381
0	0	58	0
0	0	0	0
987	54	149	0
385	0	0	178
3292	61	154	193
100	0	0	11
0	37	0	0
135	14	0	0
274	20	40	21
0	0	0	0
0	23	31	47
40883	5849	5349	2010
100	0	0	55
0	0	0	0
147	14	131	14
0	19	76	0
342	75	0	0
0	0	0	0
86	0	11	0
809	45	0	69
1897	169	802	100
0	0	0	0
89	0	90	0
1340	166	113	343
200	0	62	8
1011	0	37	139
0	0	0	0
1023	72	370	97
97	0	0	0
943	172	303	102
0	0	0	0
743	0	172	16
0	0	0	0
0	29	37	19
0	0	0	0
52	0	0	47
569	246	187	183
643	113	385	116
502	71	0	36
1228	123	180	205
393	83	69	0
0	0	0	0
1409	357	227	301
2058	180	246	21
0	0	0	0
418	186	42	0
540	0	55	22
0	0	0	0
585	49	0	126
182	0	0	19
0	0	0	0
0	0	0	0
21595	1069	1874	2321
71	0	0	0
1580	73	62	157
883	245	119	45
0	0	0	0
0	0	0	0
237	58	222	180
660	131	589	397
0	0	0	0
14682	880	977	2725
138	62	14	0
45	0	0	0
13347	1618	4276	1585
0	0	0	0
1381	0	45	137
0	0	0	0
0	0	0	0
2515	313	198	606
0	0	0	0
90	0	0	0
0	0	0	0
3063	266	508	439
1219	93	705	330
10060	1682	3035	1478
0	0	0	0
0	0	0	0
308	0	0	0
588	53	14	43
2730	503	401	1601
0	0	0	0
1000	110	321	108
0	0	0	0
0	0	0	0
1706	0	302	370
4512	152	1354	1161
413	0	293	196
2080	146	800	1108
116	0	0	51
0	0	0	0
502	0	9	353
0	0	0	0
0	0	0	0
0	0	0	0
0	0	0	0
2044	81	367	242
3629	192	1583	635
0	0	0	0
3339	476	1518	655
469	0	119	255
545	0	1010	197
0	0	0	0
1663	19	0	461
94	0	36	0
0	0	0	0
4751	542	378	130
1791	333	75	149
190	33	189	72
0	0	0	0
0	0	0	0
244	0	165	187
0	0	0	0
554	66	0	70
1645	244	422	505
0	0	0	0
5855	804	1007	537
0	0	0	0
0	0	0	0
24142	2374	927	3554
1416	0	186	351
371	0	0	0
0	0	0	0
327	0	0	0
327	0	0	0
319	73	272	75
271	81	0	0
156	50	34	0
191	149	34	103
288	132	22	272
9836	374	2199	1638
1529	472	604	133
230	57	125	71
0	0	0	0
0	0	0	0
0	0	221	0
46	34	93	70
309	20	0	0
0	0	0	0
6780	1193	2139	1205
0	0	0	0
0	0	0	0
1777	181	424	616
775	107	62	158
2470	148	140	240
56	0	0	0
6503	1441	1759	819
0	0	0	0
12865	758	4443	1990
520	37	0	57
596	0	96	145
0	0	0	0
172	0	0	0
761	40	0	0
35	0	12	9
2054	0	553	372
3942	288	657	99
8118	2397	3939	2586
2029	52	427	376
0	0	0	0
287	167	0	59
3340	387	295	25
80	12	32	37
51	0	58	0
0	0	0	0
63	0	80	85
3369	338	573	439
414	0	0	0
41	0	84	0
5173	503	1326	968
6467	1026	1139	1192
843	0	395	299
729	54	0	93
0	0	0	0
0	0	0	0
16	0	0	3
0	0	87	0
906	0	209	0
1488	103	176	239
0	0	0	0
0	0	0	0
729	54	0	93
5508	1212	2150	1368
93	41	0	14
24142	2374	927	3554
47	0	145	0
510	24	0	90
1002	0	306	423
4076	210	961	446
0	0	0	374
3970	302	1407	176
0	0	0	0
1866	117	505	492
147	0	0	0
1698	367	154	180
203	0	0	31
0	0	0	0
99	0	0	0
204	12	96	0
985	168	333	30
0	0	0	0
355	170	0	0
905	21	86	0
339	83	263	102
1505	47	352	842
530	171	164	88
0	0	0	0
0	0	0	0
190	22	15	0
0	0	0	0
0	0	0	0
976	0	302	114
2477	16	617	76
0	0	0	0
0	0	0	0
1368	148	67	25
359	0	73	0
0	0	0	0
0	0	0	0
16205	1683	2300	1956
0	0	0	0
116	0	22	0
0	0	0	0
823	158	108	0
462	104	213	86
436	125	68	77
0	0	0	0
54	80	0	21
0	0	0	0
307	183	445	0
316	0	21	0
9796	2646	2159	676
114	119	209	70
0	0	0	0
0	0	0	0
948	18	214	40
4239	320	1277	696
0	0	0	0
473	12	100	50
249	39	67	0
0	55	50	0
0	0	0	0
80	0	54	0
439	0	0	75
0	0	0	0
679	34	253	17
611	0	1010	197
23746	2086	5243	2840
10014	1560	1995	916
60	0	0	0
147	284	0	0
0	0	0	0
16567	1019	4905	2496
0	0	0	0
599	0	0	0
0	0	0	0
0	0	0	0
0	0	0	0
314	58	53	80
305	0	266	0
0	0	0	0
87	0	0	83
1588	20	308	21
0	0	0	0
0	0	0	0
0	0	0	0
0	0	0	0
1770	172	752	538
0	0	0	0
520	48	124	81
0	0	0	0
0	0	0	0
15	11	45	34
11688	691	2029	1449
225	136	0	0
0	0	0	0
0	0	0	0
4657	1149	1118	625
198	0	83	36
0	0	0	0
0	0	0	0
0	0	0	0
217	32	164	67
0	0	0	0
1097	127	209	0
0	0	0	58
241	36	147	18
69	0	47	27
0	0	0	0
47	35	0	18
0	0	0	0
0	0	0	0
0	0	0	0
634	0	86	32
386	0	84	137
3315	661	1612	723
0	0	0	0
0	0	0	0
192	200	39	15
0	0	0	0
1279	351	612	1014
0	0	0	0
0	0	0	0
0	0	0	0
0	0	0	0
0	0	0	0
0	0	0	0
0	0	0	0
0	0	0	0
0	0	0	0
0	0	0	0
0	0	0	0
99	185	404	0
127	0	28	0
0	0	0	0
0	0	0	0
0	0	0	0
0	0	0	0
0	0	0	0
0	0	0	0
219	41	167	253
0	0	0	0
0	0	0	0
13	28	0	0
6028	389	1384	1003
0	0	0	0
243	0	0	0
0	0	0	0
0	0	0	0
2674	104	236	642
0	0	0	0
739	0	179	0
0	0	0	0
641	132	326	82
0	0	0	0
108	0	16	59
0	0	0	0
13034	694	2089	1029
943	286	213	308
5827	803	181	256
0	0	0	0
0	0	0	0
0	0	0	0
747	177	145	52
0	0	0	0
0	0	0	0
4082	322	440	570
278	0	45	162
286	0	97	55
1576	0	534	112
854	51	0	630
0	0	0	0
0	0	0	0
0	0	0	0
0	0	0	0
0	0	0	0
525	0	0	206
0	0	0	0
35	0	35	0
40	0	0	0
3117	239	1399	1438
4476	650	643	630
0	0	0	0
1832	458	287	522
0	0	0	0
0	0	0	0
0	0	0	0
0	0	0	0
0	0	0	0
1008	169	165	225
4397	1366	1230	655
1013	16	0	0
0	0	0	0
10320	1688	3092	1339
1572	0	58	176
0	0	0	0
0	0	0	0
0	0	0	0
1507	0	798	658
245	98	0	0
8143	2162	2512	1041
0	0	0	0
18047	451	1502	1542
1397	116	234	158
36445	5926	11026	2386
0	0	0	0
31	0	60	40
0	0	0	0
0	0	0	0
0	0	0	0
0	0	0	0
12	0	36	27
1715	114	233	234
1054	170	140	211
0	0	0	0
269	42	58	73
0	0	0	0
195	0	0	0
2584	214	389	419
390	249	189	71
60	32	17	12
711	51	111	409
1620	0	0	0
0	0	0	0
153	0	0	39
0	0	0	0
0	341	0	141
579	113	155	187
563	0	72	18
1478	0	341	258
0	0	0	0
0	0	0	0
0	0	0	0
38	14	0	0
832	0	85	96
216	0	63	0
0	0	0	0
782	0	68	69
3696	134	898	711
563	42	57	65
343	0	19	13
0	0	0	0
0	0	0	0
955	81	441	0
0	0	0	0
849	65	416	67
0	0	0	0
0	0	0	16
65	0	0	24
993	311	106	361
0	0	0	0
367	0	125	64
0	0	0	0
0	0	0	0
0	0	0	0
355	0	216	148
82851	8585	15698	14347
334	52	127	32
0	0	0	0
1336	48	0	0
0	0	0	0
0	0	0	0
9	0	0	0
16328	686	697	754
212	0	0	0
72	0	49	0
190	0	0	15
0	0	0	25
193	84	0	163
177	0	104	79
758	251	496	692
0	0	0	0
685	76	244	0
0	0	0	0
0	0	0	0
433	153	93	158
2575	0	1221	0
6990	914	443	1075
11540	3146	4724	1420
0	0	0	0
0	0	0	0
0	0	0	0
169	0	0	0
0	0	0	0
0	0	0	0
0	0	0	0
1928	154	0	106
0	0	0	0
327	0	0	18
45	0	0	12
203	0	83	0
0	0	0	0
0	0	0	0
226	0	0	0
0	0	0	0
4739	608	1435	736
0	0	0	0
565	0	140	86
6057	2395	2775	1037
0	0	0	45
889	0	253	80
0	0	0	0
0	0	0	0
713	66	236	178
0	0	0	0
1046	206	500	24
347	18	37	0
0	0	0	0
0	0	0	0
560	62	284	172
1928	154	0	106
0	0	0	0
0	0	0	0
657	0	0	0
16489	301	3635	4576
0	0	0	0
0	0	0	0
0	0	0	0
155	0	0	59
148	60	0	129
531	143	180	159
0	0	0	0
0	0	0	0
1945	252	172	77
0	0	0	0
12	0	0	0
0	0	0	0
19	0	0	0
0	0	0	0
0	0	0	0
1414	366	161	122
0	0	0	0
0	0	0	0
0	0	0	0
0	0	0	0
0	0	0	0
1389	56	0	0
0	0	0	0
0	0	0	0
455	19	77	0
95	0	0	41
29	32	0	0
0	0	0	0
0	0	0	0
0	0	0	0
0	0	0	0
292	166	122	53
4440	267	321	199
478	0	152	69
297	0	40	46
13	0	0	0
0	0	0	0
0	0	0	0
2394	157	143	243
2882	306	994	40
28	0	0	0
0	0	0	0
1101	108	55	330
1411	75	0	115
1356	95	734	392
0	0	0	73
370	0	0	74
4866	463	949	500
0	0	0	0
254	63	143	439
0	0	0	0
0	0	98	37
360	129	48	174
0	0	0	0
0	0	0	0
0	0	0	0
0	0	0	0
3063	266	508	439
0	0	0	0
0	0	0	0
0	0	0	0
651	129	117	0
69	0	47	27
976	0	302	114
561	14	132	85
8087	1633	2914	1871
8087	1633	2914	1871
6951	643	2800	757
1872	223	391	246
1872	223	391	246
1132	0	197	226
1132	0	197	226
2009	216	307	217
19473	1463	3797	2627
7282	832	952	393
38694	11286	10887	2918
9723	713	1615	915
9723	713	1615	915
2248	418	381	86
1274	133	421	110
1839	222	396	73
1589	451	808	494
11547	1022	2098	1053
9958	571	1290	559
0	0	0	0
6985	335	470	425
2124	329	893	119
555	150	359	39
4855	1255	2476	255
6010	426	2327	513
13232	572	2973	1318
1279	202	0	120
1975	444	458	262
10084	1690	3547	1365
5107	1027	840	216
0	0	0	0
0	0	0	0
54831	8912	13774	8672
55039	8912	13774	8672
35597	3341	6451	4763
670	71	97	73
670	71	97	73
51056	7740	7407	3252
10726	1044	722	2336
237	58	222	180
10084	738	809	1386
7666	1515	1643	828
0	0	0	0
373	330	242	403
520	37	0	57
16436	1487	3075	1641
2331	169	870	174
3012	585	765	865
3012	585	765	865
3012	585	765	865
5036	389	1325	911
1368	175	630	403
575	0	0	167
149	0	0	0
949	190	0	0
271	0	125	0
13640	659	901	2439
0	0	0	0
2645	289	229	928
1340	166	113	343
0	0	0	0
1102	0	185	198
8247	815	1836	1718
339	0	25	0
413	0	293	196
0	0	0	0
8253	1382	1405	671
1359	187	461	116
589	0	337	170
0	0	0	0
21683	3038	3834	6062
0	0	0	0
1369	131	1077	305
0	0	190	0
3489	349	496	886
0	0	0	0
182	0	46	70
0	0	0	0
0	0	0	0
2516	318	959	358
0	18	0	37
1488	103	176	239
345	71	0	162
0	0	0	0
7147	906	1710	401
0	0	0	0
491	0	88	155
192	57	137	124
3042	285	391	267
2784	0	428	126
2547	413	449	426
144	160	38	57
0	0	41	31
1018	135	159	195
0	0	0	0
0	0	0	0
697	0	69	13
0	0	0	0
0	0	0	0
1145	247	372	19
3292	61	154	193
1002	0	306	423
1002	0	306	423
0	0	0	0
8052	899	843	366
15569	880	1817	1662
36470	2232	6813	5059
2406	642	1317	1762
69	0	35	0
0	0	0	0
1572	49	185	292
2441	259	638	153
0	0	0	0
0	0	0	0
0	0	0	0
0	0	0	0
66	0	0	0
0	0	0	0
0	0	0	0
407	284	79	25
0	0	0	0
0	0	0	0
0	0	0	0
0	0	0	0
0	0	0	0
56	0	0	0
0	0	0	0
0	0	0	0
0	37	0	0
3023	647	1259	387
1815	472	338	232
0	0	0	0
461	0	0	0
0	0	0	0
0	0	0	0
0	0	0	0
548	77	120	258
3696	0	749	477
0	0	0	0
0	0	0	0
242	0	79	0
4505	414	1403	701
0	0	0	0
0	0	0	0
0	0	0	0
0	0	0	0
0	0	0	0
0	0	0	0
1230	0	225	24
0	0	0	0
0	0	0	0
0	0	0	0
0	0	0	0
0	0	0	0
597	0	213	55
0	0	0	0
0	0	0	0
0	0	0	0
4470	335	976	482
2202	0	777	235
436	125	68	77
540	0	55	22
0	0	0	0
0	0	0	0
0	0	0	0
0	0	0	0
351	0	204	86
0	0	0	0
0	0	0	0
2575	0	1221	0
784	18	254	230
371	138	94	0
3483	387	295	43
0	0	0	0
1799	669	61	276
0	0	0	0
0	0	0	0
0	0	0	0
2423	642	1317	1762
2406	642	1317	1762
1989	203	324	140
0	0	0	0
23016	1235	2569	2474
0	0	0	0
0	0	0	0
0	0	0	7
536	80	0	27
8337	1765	3262	2114
0	0	0	0
0	0	0	0
0	0	0	126
0	0	0	0
2212	77	158	245
0	0	0	0
0	0	0	0
0	0	0	0
0	0	0	0
0	0	0	0
1842	197	95	322
481	0	0	0
1109	268	100	106
0	0	0	0
0	0	0	0
0	0	0	0
3692	1747	1914	1236
0	0	0	0
0	0	0	0
0	0	0	0
0	0	0	0
22321	4121	13514	4741
0	0	0	0
1204	36	329	92
0	0	0	0
0	0	0	0
0	0	0	0
801	0	95	235
0	0	0	0
0	0	0	0
103	0	11	32
0	0	0	0
492	0	154	0
0	0	0	0
0	0	0	0
0	0	0	0
0	0	0	0
0	0	0	0
0	0	0	0
353	92	95	94
0	0	0	0
1337	430	1817	476
224	138	53	65
264	24	267	0
264	24	267	0
1543	221	181	258
2988	238	1245	205
2988	238	1245	205
393	0	61	0
937	21	0	102
0	0	0	0
464	0	157	89
0	0	0	0
5952	286	585	1069
1961	252	453	342
71	0	0	0
0	0	0	0
330	0	0	84
17063	907	4110	2865
0	0	0	0
0	0	0	0
0	0	0	0
0	0	0	0
0	0	0	0
94	53	0	92
527	0	30	112
0	0	0	0
0	0	67	0
2014	454	1817	404
825	263	279	60
0	0	0	0
0	0	0	0
109	135	185	56
175	29	20	15
0	0	0	63
0	0	0	0
28547	1761	2302	919
0	0	0	0
323	0	134	28
0	0	0	0
0	0	0	0
0	0	0	0
578	22	172	16
0	0	0	0
0	0	0	0
0	0	0	0
643	113	385	116
0	0	0	0
0	0	0	0
0	0	0	0
2057	466	132	162
135	0	20	45
0	0	0	0
0	0	0	0
0	0	0	0
0	0	0	0
0	0	0	0
1143	0	13	128
1459	222	17	179
1400	101	86	109
585	49	0	126
7325	85	1622	1005
1046	0	97	335
376	56	0	144
5196	410	1189	694
42	0	0	10
0	7	0	0
73	0	0	0
422	33	0	0
1208	164	753	166
0	0	0	0
3587	0	196	559
270	14	0	146
3774	622	708	478
52	13	0	0
230	96	186	75
0	0	0	0
23	0	0	0
0	0	0	0
0	0	0	0
1620	0	0	0
240	27	286	129
0	0	0	0
0	0	0	0
0	0	0	0
0	0	0	75
8606	1788	1978	920
163	0	0	0
0	0	0	0
0	0	0	0
0	0	0	0
0	0	0	0
0	0	0	0
724	17	11	77
0	0	0	0
106	0	0	0
848	202	172	0
0	0	0	0
671	0	0	22
491	0	88	155
579	113	155	187
0	0	0	0
169	0	0	0
0	0	0	0
767	143	334	147
0	0	0	0
2740	32	355	456
0	0	0	0
0	0	0	0
0	0	0	85
0	0	0	0
0	0	0	0
0	0	0	0
459	34	47	0
93	0	56	0
0	0	0	0
0	0	0	0
1410	91	151	90
0	0	0	0
0	0	0	0
81	0	0	0
0	0	0	0
0	0	0	0
0	0	0	0
0	0	0	0
0	0	0	0
0	0	0	0
0	0	32	0
0	0	0	0
0	0	0	0
0	0	0	0
250	0	0	0
0	0	0	0
0	0	0	0
622	60	407	188
0	0	0	0
0	0	0	0
149	0	341	0
0	0	0	0
0	0	0	0
515	0	0	196
0	0	0	0
7	0	0	0
0	0	0	0
0	0	0	0
2821	0	1344	642
870	0	0	0
0	0	0	0
259	0	16	0
0	0	0	0
0	0	0	0
0	0	0	0
469	20	114	0
0	0	0	0
0	0	35	0
15776	2253	2528	1563
3378	415	766	472
0	0	0	0
199	0	128	84
960	112	130	58
199	39	135	0
0	0	0	0
175	0	0	55
35	0	0	67
0	0	0	0
0	0	0	0
306	11	0	0
0	0	0	0
0	0	0	0
0	0	0	0
0	0	0	0
0	0	0	0
0	8	0	0
0	0	0	0
316	91	0	54
0	0	0	0
0	0	0	0
0	0	0	0
0	0	0	0
0	0	0	0
688	323	552	83
0	0	0	0
0	0	0	0
0	0	0	0
143	16	0	42
0	0	0	0
0	0	0	0
0	0	0	0
875	154	70	283
5055	944	1380	1276
20214	3008	3258	2419
5055	944	1380	1276
2295	34	513	317
955	166	710	0
0	0	0	0
18996	995	1175	814
18996	995	1175	814
18996	995	1175	814
18996	995	1175	814
0	0	0	0
0	0	0	0
0	0	0	0
6307	1075	2939	1029
96	0	24	64
211	0	42	176
2130	587	583	525
0	0	0	0
0	0	0	0
0	0	0	0
128	0	260	0
106	0	0	0
0	0	0	0
0	0	0	0
7584	1393	2767	1390
9546	405	931	1135
0	0	0	0
0	0	0	0
4298	0	1396	642
0	0	0	0
0	0	0	0
0	0	0	0
0	0	0	0
0	0	0	0
126	36	0	7
24142	2374	927	3554
0	0	0	0
0	0	0	0
0	123	168	0
0	0	0	0
2972	150	0	401
0	0	0	0
1412	211	398	292
955	166	710	0
0	0	0	0
0	0	0	0
0	0	0	0
29	0	22	0
19927	1397	3797	2234
0	0	0	0
0	0	0	0
287	0	0	0
0	0	0	0
0	0	0	0
19927	1397	3797	2234
19927	1397	3797	2234
19927	1397	3797	2234
0	0	0	0
0	0	0	0
0	0	0	0
0	0	0	0
0	0	0	0
3643	224	887	374
0	0	0	0
226	0	0	0
0	0	0	0
0	0	0	0
0	0	0	0
18830	1673	2164	974
2545	198	953	43
0	0	0	0
0	0	0	0
0	0	0	0
0	0	0	0
0	0	0	0
0	0	0	0
0	0	0	0
0	0	0	0
175	52	0	0
0	0	0	0
0	0	0	0
1979	299	553	372
0	0	0	0
282	0	110	83
0	0	0	0
0	0	0	0
4803	611	1606	1310
707	28	58	103
304	0	85	80
843	0	395	299
843	0	395	299
0	0	0	0
1440	68	580	299
9310	627	2527	1529
0	0	0	0
4848	716	1188	290
707	22	0	173
0	0	0	0
2482	453	502	655
0	0	0	0
0	0	0	0
0	0	0	0
0	0	0	0
0	0	0	0
14	0	51	11
471	194	159	123
39	0	40	15
0	0	0	0
0	0	0	0
4082	322	440	570
0	0	0	0
96	0	0	0
338	63	86	65
0	0	0	0
35	0	18	40
0	0	0	0
32	0	0	0
0	0	0	0
942	0	79	0
942	0	79	0
0	0	0	0
0	0	0	23
0	0	0	0
0	0	0	0
55	0	0	0
0	0	0	0
980	136	0	280
377	0	128	305
134	0	0	0
0	0	0	0
0	0	0	0
0	0	0	0
9261	1630	715	427
0	0	0	0
174	25	38	22
0	0	0	0
0	0	0	0
2044	81	367	242
400	99	37	84
0	0	0	0
0	0	0	0
2288	113	446	195
2288	113	446	195
0	0	0	0
0	0	0	0
0	0	0	0
0	0	0	0
1777	124	550	565
1503	151	0	427
0	0	0	0
0	0	0	0
0	0	0	0
0	0	0	0
0	0	0	0
0	0	0	0
0	0	0	0
0	0	0	0
0	0	0	0
1989	203	324	140
0	0	0	0
0	0	0	0
0	0	0	0
0	0	0	0
0	0	0	0
0	0	0	0
0	0	0	0
0	0	0	0
1855	271	584	233
0	0	0	0
0	0	0	0
0	0	0	0
412	0	139	0
0	0	0	0
1411	75	0	115
0	0	0	0
0	0	0	0
0	0	0	0
0	0	0	0
0	0	0	0
0	0	0	0
4	0	0	0
0	0	0	0
0	0	0	0
0	0	0	0
0	0	0	0
547	185	112	0
0	0	0	0
0	0	0	0
0	0	0	0
0	0	0	0
0	0	0	0
0	0	0	0
0	0	0	0
0	0	0	0
0	0	0	0
0	0	0	0
0	0	0	0
63	0	0	24
0	0	0	0
204	0	0	0
0	0	0	0
0	0	0	0
0	0	0	0
0	0	0	0
0	0	0	0
0	0	0	0
0	0	0	0
0	0	0	0
0	0	0	0
0	0	0	0
0	0	0	0
2926	433	927	742
0	0	0	0
0	0	0	0
980	177	27	102
1499	139	349	408
895	31	59	0
0	0	0	0
326	27	74	14
0	0	0	0
0	0	0	0
410	0	139	123
0	0	0	0
0	0	0	86
0	0	0	0
0	38	0	0
0	0	0	0
0	0	0	0
0	0	0	0
1365	367	154	87
0	0	0	0
1071	365	726	445
0	16	110	0
281	0	0	132
0	0	0	0
0	0	0	0
0	0	0	0
0	0	0	0
3339	476	1518	655
0	0	0	0
100	0	0	0
0	0	0	0
0	0	0	0
0	0	0	0
99	0	0	0
0	157	54	93
0	0	0	0
1500	0	0	0
0	0	0	0
0	0	0	0
0	0	0	0
0	0	0	0
1869	0	443	72
0	0	0	0
39	0	30	0
1944	304	962	157
0	0	0	0
0	0	0	0
0	0	0	0
66	0	0	0
0	0	0	0
0	0	0	0
0	0	0	0
0	0	0	0
0	0	0	0
0	0	0	0
0	0	0	0
0	0	0	0
3556	221	1191	356
0	0	0	0
507	283	365	65
119	0	121	91
153	0	0	0
0	0	0	0
0	0	0	0
0	0	0	0
0	0	0	0
0	0	0	0
300	149	51	384
85	0	0	26
0	0	0	0
0	0	0	0
0	0	0	0
0	0	0	0
0	0	0	0
204	0	0	0
0	0	0	0
0	0	0	0
0	0	0	0
0	0	0	0
0	0	0	0
0	0	0	0
0	0	0	0
99	185	658	0
0	0	0	0
484	136	402	0
670	0	0	0
0	0	0	0
782	0	0	77
0	0	0	0
0	0	0	0
89	0	0	0
0	0	0	0
88	109	208	22
0	0	0	0
0	0	0	0
0	0	0	0
0	0	0	0
0	0	0	0
0	0	0	0
352	0	0	0
0	0	0	0
0	0	0	0
0	0	0	0
0	0	0	0
4203	495	892	0
0	0	0	0
0	0	0	0
0	0	0	0
0	0	0	0
0	0	0	0
0	0	0	0
313	0	56	127
0	0	0	0
396	114	128	28
0	0	0	0
0	0	0	0
0	0	0	0
0	0	0	0
0	0	0	0
0	0	0	0
0	0	0	0
802	0	121	121
1363	231	326	360
0	0	0	0
0	0	0	0
0	0	0	0
0	0	0	0
0	0	0	0
34	0	0	0
850	62	432	64
0	0	0	0
0	0	0	0
439	0	0	75
0	19	76	0
0	0	0	0
0	0	0	0
49482	5594	9951	10472
40520	4980	8812	9710
1578	210	1145	173
1578	210	1145	173
45	0	0	0
0	0	0	0
0	0	0	0
0	0	0	0
0	0	0	0
0	0	0	0
4855	1255	2476	255
4855	1255	2476	255
0	0	0	0
0	0	0	0
0	0	0	49
0	0	0	0
0	0	0	0
0	0	0	0
18047	451	1502	1542
0	0	0	0
2273	412	507	213
0	0	0	0
0	0	0	0
0	0	0	0
0	0	0	0
506	55	75	76
0	0	0	0
0	0	0	0
1302	40	155	284
0	0	0	0
0	0	0	0
1886	104	0	114
0	0	0	0
677	121	193	24
46302	5424	14570	9260
0	0	0	0
0	0	0	0
1620	0	0	0
0	0	0	0
1620	0	0	0
3617	1720	2114	1606
0	0	0	0
184	0	23	0
0	0	0	0
0	0	0	0
6780	1193	2139	1205
7620	1394	1693	1473
0	0	0	0
118	47	304	0
623	348	106	80
623	348	106	80
0	0	0	0
19075	1997	4452	1736
192658	20107	53052	29625
367	0	37	56
0	0	0	0
12595	1044	1165	2408
1995	0	101	152
305	0	266	0
1411	364	344	303
0	0	0	0
6010	426	2327	513
0	0	0	0
4683	163	529	105
0	0	0	0
0	0	0	0
0	0	0	0
0	0	0	0
0	0	0	0
0	0	0	0
0	0	0	0
0	0	0	0
0	0	0	0
0	0	0	0
0	0	0	0
0	0	0	0
0	0	0	0
0	0	0	0
0	0	0	0
52	0	38	0
0	0	190	0
0	0	190	0
701	72	9	56
0	0	0	0
0	0	0	0
0	0	0	0
0	0	0	0
0	0	0	0
0	0	0	0
99	0	0	0
0	0	0	0
1209	0	609	38
0	0	0	0
0	0	0	0
0	0	0	0
77	0	0	39
2502	319	1090	329
0	0	0	0
0	0	0	0
1571	246	463	604
5857	761	1408	1525
548	77	120	258
46426	3988	13583	6832
1663	19	0	461
59331	8195	8429	4337
0	0	0	0
3970	302	1407	176
0	0	0	0
0	0	0	0
0	0	0	0
2296	202	277	30
0	0	0	0
43	0	520	393
0	0	0	0
0	0	87	0
74	28	0	57
718	0	52	522
1011	0	37	139
1675	643	824	332
386	155	101	87
1973	367	468	227
0	0	0	0
0	0	0	0
0	0	0	0
0	0	0	0
1136	523	275	291
63	62	21	64
772	0	0	0
392	0	0	0
3573	1837	2604	597
5559	215	1248	1046
15206	3073	4778	3400
0	0	0	0
948	0	214	40
0	0	0	0
0	0	0	0
15159	2064	1878	1151
2941	538	575	530
0	0	0	0
3299	26	288	65
0	0	0	0
0	0	0	0
0	0	0	0
0	0	0	0
693	59	348	118
206	100	206	36
0	0	0	0
1973	367	468	227
330	0	0	84
0	0	0	0
0	0	0	0
0	0	0	0
0	0	0	0
0	0	0	0
0	0	0	0
0	0	301	0
0	0	0	0
0	0	0	0
348	0	0	53
478	0	152	69
0	0	0	0
962	189	316	150
0	0	0	0
4005	206	427	592
0	0	121	0
0	0	0	0
0	0	0	0
46	34	93	70
542	0	620	208
0	0	0	0
0	0	0	0
0	0	0	0
0	0	0	0
134	0	34	0
373	104	0	36
280	111	0	0
3372	86	392	238
0	0	0	0
2083	94	285	692
1207	168	210	42
0	0	0	0
5092	1418	599	295
0	0	0	0
0	0	0	0
4864	552	744	850
449	37	128	155
952	35	313	73
4363	426	1498	904
449	37	128	155
433	153	93	158
0	0	0	0
0	0	0	0
[truncated: 1,185 more rows]

## Sheet: BACCAC_15days
2818	6832	20766	4384
945	2408	4280	1837
4019	6233	10206	5646
0	0	0	0
1481	4164	7688	2296
344	1304	512	250
0	0	0	0
49	84	134	86
0	26	174	0
71	38	25	39
60	59	210	221
0	0	0	0
12	0	1414	24
1545	2020	2338	1849
0	0	0	0
21437	12356	31296	13926
30	0	0	49
146	149	112	57
108	0	255	111
0	0	0	0
0	0	0	0
41106	29727	21299	13843
0	78	68	27
0	166	109	0
408	818	1392	333
0	0	0	0
156	174	197	26
179	766	670	359
221	192	605	120
51	20	0	21
187	79	221	296
61	0	70	0
443	134	618	91
1223	1605	2303	1328
897	537	1552	785
700	2215	5622	2086
379	365	511	310
523	166	1101	118
127	101	674	59
25180	14244	23210	16244
88	0	139	181
170	535	489	158
142	135	376	114
1622	689	1888	581
0	0	0	0
155	291	436	117
1479	1024	4964	1942
0	114	453	295
0	0	0	0
0	0	27	0
0	0	0	0
343	410	949	501
0	0	0	0
1422	1357	2208	1289
99	78	233	101
1443	1241	3495	1786
139	81	334	60
812	303	1093	652
20	16	36	0
415	210	1079	549
14	23	151	35
94	197	204	165
0	0	0	0
0	10	40	0
2138	915	3710	1954
389	174	415	182
68	0	0	0
11	9	12	84
1033	790	1544	1076
242	84	256	110
245	195	1374	378
67	61	326	74
240	251	331	114
0	0	0	0
0	0	0	0
47	62	224	39
97	253	282	319
0	0	0	0
233	232	409	184
0	0	54	5
2609	1627	2656	1115
1170	796	1427	540
1328	1848	1854	1059
4917	6529	9225	2898
4087	3297	8031	4626
33	0	137	27
691	585	1374	668
200	74	490	339
20	109	165	32
676	566	1756	576
0	0	0	0
0	0	0	0
70	111	146	57
2994	2708	3682	1617
568	593	596	226
128	170	651	315
0	0	0	0
30	2	226	48
17	14	18	0
0	0	0	0
267	106	70	55
0	0	0	0
97	115	127	0
131	454	412	215
21	0	76	90
11	0	60	35
50	231	506	566
0	0	0	21
166	0	315	117
57	0	30	0
537	839	1559	273
0	0	0	0
0	0	0	0
2366	1545	4853	1521
3292	2646	6696	2745
156	198	446	204
0	0	0	1
191	36	364	0
0	0	70	11
69	137	289	310
2566	2879	4510	2655
600	1028	1534	1414
469	545	720	414
0	58	0	45
472	568	914	113
52	234	340	157
199	342	618	217
0	133	234	226
29	47	62	84
11	0	259	257
36	85	93	58
2018	988	4998	1326
0	0	0	0
152	90	80	31
983	1742	2619	2789
0	80	244	221
248	507	774	203
435	0	114	178
0	0	0	0
139	93	620	284
0	0	0	0
0	0	0	0
60	95	71	59
2128	1817	3096	1690
1	0	17	0
0	0	0	0
114	60	319	93
7622	6029	13081	6138
0	0	0	0
12	20	75	14
55	278	151	100
0	35	8	18
639	381	771	157
245	243	514	60
74	288	653	444
114	60	319	93
0	22	57	0
69	240	269	229
58	46	30	0
0	0	0	0
0	0	0	0
153	687	1628	355
0	0	0	0
0	0	0	0
35	27	168	0
484	881	859	457
604	575	850	1241
0	0	40	0
0	0	0	0
153	119	492	0
0	0	0	0
56	0	207	69
0	0	0	0
0	47	227	16
28	104	141	38
0	0	0	0
416	331	649	120
0	0	0	0
0	0	0	0
732	949	1428	518
109	1218	402	314
3049	981	3663	1811
879	242	1399	617
845	1148	3253	549
0	30	80	23
0	0	0	0
7699	4483	6475	3630
946	847	2519	530
0	0	49	0
74	44	82	76
0	0	161	0
0	4	0	0
0	0	8	0
0	0	0	0
443	450	460	377
57	145	156	84
0	0	0	0
31	260	227	126
56	0	110	12
408	648	877	337
0	0	0	0
1719	2077	2471	1077
206	79	824	197
0	0	0	0
432	1144	383	507
326	138	709	63
0	0	0	0
31	287	677	225
82	261	489	247
99	51	163	20
25	6	59	64
841	844	2228	959
0	4	2	0
50	148	207	56
0	84	193	0
0	0	0	22
340	541	143	614
247	365	1226	671
1286	1647	1391	615
92	262	537	47
0	0	0	0
0	0	0	0
514	574	1524	416
284	164	244	159
480	279	267	136
252	297	406	590
706	653	1985	324
0	0	0	0
0	0	0	0
0	0	0	0
168	43	0	0
13	0	0	0
0	0	0	0
1002	877	1755	534
0	13	26	0
22324	12893	34563	15878
112	23	689	148
0	0	0	0
885	652	2289	1027
62	110	102	0
0	0	82	0
0	0	0	0
0	0	451	313
447	482	904	490
322	335	1029	260
58	4	51	40
0	0	0	0
0	0	0	0
252	371	1532	581
2	0	41	0
23	0	159	0
1406	1023	3399	1437
0	0	0	0
638	1086	2199	747
0	0	0	0
0	0	0	0
1254	750	3241	582
808	730	2593	1169
0	0	7	0
60	12	117	0
110	150	315	65
608	1678	2053	904
461	705	635	345
391	157	1800	386
930	419	2036	915
10333	16843	18379	11658
238	0	822	22
0	29	19	0
0	0	3	0
0	196	52	20
1099	1724	2300	498
91	48	83	60
492	718	2347	738
161	153	84	145
0	0	0	0
2898	6264	7223	3624
0	0	0	0
0	123	84	40
1229	407	3384	839
13	96	0	0
0	40	53	21
0	0	0	0
33	157	914	162
0	0	0	0
0	0	484	105
201	80	199	0
0	0	96	0
132	104	276	72
0	0	0	0
0	0	0	0
68	909	1190	244
1003	275	835	538
0	0	70	11
359	910	3941	1047
97	772	612	478
0	0	15	0
2128	2451	8094	2511
470	390	547	217
898	1226	1678	805
384	407	471	158
17	26	171	0
65	462	1153	530
65	462	1153	530
9465	14429	19501	8105
0	107	87	17
7289	5791	12767	5974
2307	1265	4000	1923
0	23	0	0
23	73	193	0
1684	1078	4197	1129
5678	7105	13518	6610
0	0	0	0
0	91	30	0
0	0	0	0
549	694	1373	828
252	886	769	364
4368	2132	8116	3211
17	0	18	14
148	751	528	112
0	0	0	0
263	116	337	144
3840	2779	9608	2737
0	40	53	21
28	10	76	30
358	95	125	65
175	93	245	48
0	0	0	0
0	0	0	0
161	198	926	443
260	345	273	71
177	180	330	154
7053	6389	37371	10668
0	16	61	32
0	0	0	0
804	553	1300	461
115	7	169	0
219	232	459	60
0	0	0	0
37	60	393	0
353	240	597	176
0	60	393	109
42	279	470	124
0	0	21	0
0	0	0	0
0	0	0	0
21	82	430	125
49	73	43	31
0	0	97	0
260	228	301	470
16	0	41	26
0	23	17	0
0	0	16	12
0	0	28	27
0	0	0	0
0	62	163	0
238	237	1000	293
0	0	0	0
1497	1060	1764	666
0	0	0	0
119	284	626	228
0	0	0	0
154	45	89	0
2	0	0	0
329	101	425	291
0	0	0	0
5488	8084	16412	6943
0	0	0	0
72	0	165	0
812	1508	1360	1084
0	0	0	0
1677	1508	3564	1240
0	9	12	0
35	10	59	0
71	245	609	367
1915	1454	5261	2840
0	0	0	0
22	208	207	90
0	0	0	0
0	0	108	0
0	0	40	0
0	21	28	16
580	532	1454	1058
0	0	0	0
0	0	0	0
279	256	645	745
160	0	0	33
131	130	237	0
126	0	352	172
203	462	164	205
252	778	1013	339
30	48	32	25
30	48	32	25
0	15	117	61
837	354	1041	892
0	165	339	0
1529	1623	4590	668
0	0	0	0
0	29	114	0
0	0	0	0
39	0	20	0
0	0	0	0
838	171	1332	587
0	0	0	0
0	0	0	0
61	0	70	0
0	0	0	0
22307	9590	21657	10024
0	50	99	52
2609	1627	2656	1115
39	301	162	148
1003	275	835	538
0	0	0	0
0	0	0	0
295	607	1314	294
0	0	224	27
0	0	0	0
0	0	0	0
275	563	787	138
296	350	1748	456
223	243	204	205
0	0	0	0
263	539	668	216
0	0	0	15
0	105	186	36
0	0	0	0
0	0	13	10
350	269	717	125
2922	3442	3815	1457
0	0	22	0
0	0	29	67
236	109	471	131
809	831	1639	1105
1006	697	653	537
283	265	503	308
0	0	0	0
31	219	347	25
835	590	3602	608
0	0	30	12
0	0	0	0
365	271	536	339
0	0	0	61
0	0	0	0
152	73	32	25
0	0	0	0
49	196	155	121
0	0	0	0
0	0	0	0
69	28	0	0
16	0	67	131
0	26	20	27
0	0	0	0
83	198	110	188
0	0	116	0
958	1026	3389	1502
0	0	0	0
0	0	0	0
0	29	210	45
58	670	1189	575
1549	1831	1911	784
136	256	658	208
1137	519	1947	870
0	0	0	0
236	62	181	90
164	686	659	511
40	21	255	44
180	179	95	148
87	0	208	0
51	605	320	250
0	0	0	0
0	0	0	0
265	187	431	161
383	304	381	264
0	0	0	0
0	0	78	81
0	0	0	0
349	364	1100	390
70	418	479	115
61	0	96	0
0	0	0	0
0	0	0	0
0	0	0	0
0	0	0	0
233	167	389	569
1479	3276	4699	2131
0	0	0	0
0	0	0	0
174	249	256	57
0	0	8	0
0	0	224	27
0	0	0	0
0	28	12	29
0	0	76	0
264	229	337	62
0	0	0	0
101	161	61	71
10406	16872	18461	11697
0	0	0	39
0	0	0	0
88	0	37	14
24	132	150	0
169	0	152	0
0	0	0	0
0	8	0	0
228	0	509	0
401	347	587	167
0	0	0	0
0	0	0	0
0	423	0	305
19	52	265	15
241	109	434	85
0	0	0	0
46	226	365	133
0	0	78	0
300	251	447	168
0	0	0	0
76	100	40	28
0	0	0	0
0	0	0	0
0	0	0	0
0	0	87	0
298	236	551	115
361	315	1023	118
72	29	28	74
23	179	416	0
551	355	1469	190
0	0	0	0
455	353	477	29
899	286	1078	253
0	0	0	0
199	0	627	163
13	60	212	52
0	0	0	0
11	34	266	29
0	32	36	0
0	0	0	0
0	0	0	0
952	1278	4536	1941
0	36	24	0
102	47	599	268
279	177	256	124
0	0	0	0
0	0	0	0
84	0	0	28
293	400	594	381
0	0	0	0
3049	981	4035	1869
0	31	28	11
0	0	30	0
1968	2514	5740	1811
0	0	0	0
85	0	45	244
0	0	0	0
0	0	0	0
21	139	397	531
0	0	0	0
0	0	15	0
0	0	0	0
340	541	143	614
714	515	1111	518
1739	2190	4310	1629
0	0	0	0
0	0	0	0
29	0	91	0
82	11	92	44
0	82	113	132
0	0	0	0
112	179	354	127
0	0	0	0
0	0	0	0
0	84	223	58
3809	4124	9734	2800
49	236	153	0
313	587	0	51
32	38	50	0
0	0	0	0
0	0	71	0
0	0	0	0
0	0	0	0
18	73	58	0
0	0	0	0
246	196	1395	403
494	1018	1240	566
0	0	0	0
224	364	374	208
0	15	157	16
710	1263	641	526
0	0	0	0
0	0	26	20
0	0	23	0
0	0	0	0
852	631	1768	1273
215	101	179	44
0	20	83	53
0	0	0	0
0	0	0	0
0	82	108	127
0	0	0	0
86	0	134	18
43	129	506	184
0	0	0	0
1175	972	1311	584
0	0	0	0
0	0	0	0
435	0	114	178
87	346	457	178
0	0	23	0
0	0	0	0
0	0	15	0
0	0	15	0
0	66	241	0
17	164	72	0
32	110	235	70
396	51	0	0
21	67	133	86
692	1661	1047	696
113	352	653	235
293	93	169	72
0	0	0	0
0	0	0	0
0	0	131	17
262	69	46	0
0	20	0	0
0	0	0	0
1422	1657	3498	1545
0	0	0	0
0	0	0	0
114	299	460	237
138	78	261	118
0	0	169	186
0	48	0	0
2994	2708	3682	1617
29	0	46	0
2177	3031	4036	2307
47	113	520	39
30	214	377	25
0	0	0	0
0	39	69	67
78	123	299	64
0	9	23	9
461	46	61	142
62	147	259	152
3172	2156	3309	1315
133	159	630	383
0	0	0	0
272	175	257	0
369	365	770	345
30	0	16	0
18	14	43	0
0	0	0	0
32	0	32	0
401	541	207	664
0	0	135	10
0	109	0	0
914	1152	3010	727
2138	915	3710	1954
309	295	844	253
93	221	316	209
0	0	0	0
0	0	0	0
0	0	0	0
0	0	0	0
108	41	82	89
10	8	80	0
41	0	0	0
0	0	0	0
93	221	316	209
1282	2289	4029	2220
0	14	0	0
435	0	114	178
0	60	0	0
0	0	0	0
0	0	451	313
1334	1400	2082	1626
0	0	0	0
486	900	278	535
0	0	0	0
321	944	589	548
0	0	0	9
123	167	273	113
0	0	0	0
0	0	0	0
47	0	173	0
30	0	0	49
170	454	132	0
0	0	0	0
24	154	152	20
54	0	85	0
194	14	445	101
180	333	771	0
22	70	159	72
0	0	0	0
0	0	0	0
111	0	0	23
0	0	0	0
0	0	0	0
40	177	871	17
187	189	703	367
0	0	0	0
160	0	37	33
190	318	177	291
0	0	72	56
0	0	0	0
0	0	0	0
2773	2313	3315	1626
0	0	0	0
0	0	29	0
0	0	0	0
101	121	213	42
187	297	258	98
192	0	168	0
0	0	0	0
0	20	54	0
0	0	0	0
18	106	274	43
121	0	21	0
3175	3390	5259	2781
87	87	46	0
0	0	0	0
0	0	0	0
151	297	316	247
444	529	1441	780
0	0	0	0
47	37	245	26
37	30	26	10
0	84	0	19
0	0	0	0
0	60	53	0
46	18	24	0
0	0	0	0
43	34	181	159
742	1263	641	526
4188	4736	9021	2201
1384	1164	2326	400
0	0	0	0
0	67	88	46
0	0	0	0
2677	3411	5508	2991
0	0	0	0
0	0	35	0
0	25	49	0
0	0	0	0
0	0	0	0
325	198	393	102
166	0	0	0
0	0	0	0
0	33	174	16
131	298	551	239
0	0	0	0
0	0	0	0
0	0	0	0
0	0	0	0
324	322	978	199
0	0	0	0
310	135	545	51
0	0	0	0
0	0	0	0
0	0	88	0
1499	1395	4118	373
0	21	42	0
0	0	0	0
0	0	0	0
597	1005	2233	825
44	62	0	36
0	0	0	0
0	0	0	0
0	0	0	0
0	88	130	11
0	0	0	0
131	156	480	27
0	0	0	0
46	36	145	56
22	0	58	9
0	0	0	0
22	0	23	0
0	0	0	0
0	0	0	0
21	84	24	19
0	0	169	198
92	83	234	86
434	848	495	440
0	0	0	0
0	0	0	0
165	15	77	105
0	0	0	0
470	180	435	340
0	0	0	0
0	0	0	0
0	0	0	0
0	0	0	0
0	0	0	0
0	0	0	0
0	0	0	0
0	0	0	0
0	0	0	0
0	0	0	0
0	0	0	0
0	0	99	155
113	0	146	36
0	0	0	0
0	0	0	0
16	0	0	0
0	0	0	0
0	0	0	0
0	0	0	0
209	291	494	86
0	0	0	0
0	0	0	0
0	0	0	0
589	821	1599	765
0	0	0	0
0	0	0	0
0	0	0	0
0	0	0	0
177	0	511	0
0	0	0	0
168	534	317	358
0	0	0	0
0	54	71	167
0	0	0	0
0	70	0	0
0	0	0	0
407	1476	2433	1017
666	370	978	246
441	618	1230	925
9	7	39	15
18	0	0	0
0	0	0	0
32	154	204	0
0	0	0	0
0	0	0	0
531	94	619	290
42	34	371	98
182	199	310	67
807	376	497	433
16	52	68	67
0	0	0	0
0	0	0	0
0	0	0	0
0	0	0	0
0	0	0	0
0	91	17	94
0	0	0	0
0	0	0	0
8	0	0	0
1027	1102	1085	569
1541	1665	2120	745
0	0	0	0
774	315	1346	508
0	0	0	0
0	0	0	0
0	0	0	0
0	0	0	0
0	0	0	0
93	222	390	102
646	1243	2729	1487
208	33	353	52
0	0	0	0
1640	1397	3740	1700
27	0	343	89
0	0	0	0
0	0	0	0
0	0	0	0
681	1028	1572	893
0	0	94	44
4245	3910	3743	1995
0	0	0	0
1878	390	2320	900
79	86	205	188
22307	9590	21657	10024
0	0	0	0
0	8	31	32
0	0	0	0
0	0	0	0
0	0	0	0
0	0	0	0
11	0	35	0
249	63	343	238
175	139	138	107
0	0	0	0
0	0	19	15
269	0	31	13
41	148	22	34
61	408	383	199
142	197	186	131
0	0	5	0
222	124	562	150
119	0	62	195
0	0	0	0
0	58	0	0
0	0	0	0
175	243	276	36
203	115	366	214
45	107	164	73
384	407	471	158
0	0	0	0
0	0	0	0
0	0	0	0
0	0	19	0
159	158	83	98
0	0	0	0
0	0	0	0
0	51	89	0
298	278	1697	647
27	21	141	132
0	0	0	0
0	0	0	0
0	0	0	0
35	219	706	113
0	0	0	0
28	22	59	0
0	0	0	0
0	16	43	0
0	66	43	38
648	554	210	82
0	0	0	0
28	107	0	0
0	0	0	0
0	0	0	0
0	0	0	0
0	34	22	0
25910	15545	38879	17344
173	53	251	0
10	16	21	0
0	73	129	0
0	0	0	0
0	0	0	0
0	0	0	0
838	354	1525	625
45	0	47	0
0	0	48	0
0	0	19	15
0	12	16	0
0	0	114	0
0	0	0	0
143	256	676	352
0	0	0	0
33	78	0	0
0	0	0	0
0	0	0	0
500	17	205	196
491	260	687	738
908	970	2657	848
7316	4851	5272	850
0	55	18	0
0	0	0	0
0	0	0	0
0	64	0	17
0	0	0	0
0	0	0	0
0	0	0	0
0	0	344	108
0	0	0	0
78	18	117	64
29	11	136	12
39	0	20	0
0	0	0	0
0	17	11	0
29	0	30	0
0	0	0	0
1189	2831	3829	1797
0	0	0	0
21	118	134	0
1603	4826	3042	1927
0	0	0	0
59	236	0	80
65	0	17	0
0	0	0	0
238	311	375	251
0	0	0	0
411	140	677	409
0	56	12	10
0	0	0	0
0	0	0	0
53	106	560	87
0	0	344	108
0	0	0	0
0	0	0	0
109	174	38	30
1277	1209	11860	750
0	0	0	0
0	0	0	0
0	0	0	0
0	0	26	0
13	0	67	0
98	11	89	115
0	0	0	0
0	0	0	0
23	92	1013	227
0	0	0	0
0	0	12	0
0	0	0	0
0	0	0	0
0	0	0	0
0	0	0	0
152	405	239	31
0	0	0	0
0	0	0	0
0	0	0	0
0	93	0	0
0	0	0	0
72	284	301	293
0	0	0	0
0	0	0	0
0	153	253	99
0	0	32	33
42	0	15	0
0	0	0	0
0	0	0	0
0	0	0	0
0	0	0	0
16	13	86	40
685	272	546	449
114	45	209	23
0	0	40	0
38	10	0	0
0	0	0	0
0	0	0	0
201	387	1004	399
49	468	1957	724
0	0	28	22
0	0	0	0
191	180	388	0
468	0	995	326
324	322	978	199
0	0	48	0
0	12	40	0
620	407	538	1105
0	0	0	0
27	43	57	0
0	0	0	0
0	0	248	109
67	61	326	74
0	0	0	0
0	0	0	0
0	0	0	0
0	0	0	0
340	541	143	614
0	0	0	0
0	0	0	0
0	0	0	0
0	44	0	23
22	0	58	9
40	177	871	17
106	224	93	29
4368	2132	8116	3211
4368	2132	8116	3211
1277	2506	2673	1149
408	648	877	337
408	648	877	337
31	260	227	126
31	260	227	126
0	283	49	134
3323	3718	4761	2631
1210	891	1690	809
41106	29727	21299	13843
934	2027	1521	1061
934	2027	1521	1061
1286	1647	1391	615
153	119	492	0
191	36	364	0
469	545	720	414
600	1782	2006	881
131	1237	1140	467
0	0	0	0
12	0	1414	24
187	79	221	296
48	497	303	158
809	831	1639	1105
546	1187	3532	522
4087	3297	8031	4626
97	253	282	319
616	845	1421	672
2664	2916	4484	1573
732	949	1428	518
0	0	0	0
0	0	0	0
5130	6718	12431	4906
5130	6718	12570	5013
4157	3073	10662	3170
152	73	32	25
152	73	32	25
14490	19543	21806	14305
2033	5988	19582	3886
84	0	0	28
1545	2020	2338	1849
914	862	2277	749
0	0	0	0
204	99	138	152
47	113	520	39
3804	6020	9755	5316
401	347	620	167
946	847	2519	530
946	847	2519	530
946	847	2519	530
1719	2077	2471	1077
804	553	1300	461
137	82	575	267
0	0	0	0
70	111	146	57
141	56	99	0
3049	981	3663	1811
0	0	0	0
292	301	1608	482
0	423	0	305
0	0	0	0
35	0	184	86
1915	1454	5261	2840
23	0	145	0
49	236	153	0
0	0	0	0
4972	4562	5508	3471
48	535	404	158
70	418	479	115
0	0	0	0
1464	5785	7895	2971
0	0	0	0
253	268	442	345
0	303	285	0
812	303	1093	652
0	0	0	0
0	0	23	0
0	0	0	0
0	0	0	0
1673	1731	2087	983
0	0	0	0
10	8	80	0
37	15	269	0
0	0	0	0
1438	1494	3233	1392
0	0	0	0
0	0	29	23
307	123	688	771
353	431	908	322
179	177	328	238
402	581	674	553
0	0	0	0
0	31	81	0
173	248	582	483
0	0	0	0
0	0	0	0
147	65	139	0
0	0	0	0
0	0	0	0
31	38	167	30
0	0	224	27
0	0	451	313
0	0	451	313
0	0	0	0
1103	1420	1985	299
899	1119	3616	1902
3027	3570	11710	4413
882	650	1315	916
0	26	174	0
0	0	0	0
174	314	182	168
617	264	399	506
0	0	0	0
0	0	0	0
0	0	0	0
0	0	0	0
0	0	66	0
0	0	0	0
0	0	0	0
0	67	102	46
0	0	0	0
0	0	0	0
0	0	0	0
0	0	0	0
0	0	0	0
0	84	28	0
0	0	23	0
0	0	0	0
16	0	33	0
1291	1329	2409	1102
1067	1100	999	473
0	0	0	0
23	0	48	93
0	0	0	0
0	0	0	0
0	0	0	0
364	0	396	244
408	797	809	437
0	0	0	0
0	0	0	0
0	0	13	0
448	618	1324	421
0	0	0	0
0	0	0	0
0	0	0	0
0	0	0	0
0	0	0	0
0	0	0	0
60	0	95	0
0	0	0	0
0	0	0	0
0	0	0	0
0	0	72	0
0	0	0	0
0	23	257	93
0	0	0	0
0	0	0	0
0	0	0	0
845	1148	3253	549
175	93	245	48
192	0	168	0
13	60	212	52
0	0	0	0
0	0	0	0
0	0	0	0
0	0	0	0
223	197	160	113
0	0	0	0
0	0	0	0
491	260	687	738
50	148	207	56
88	0	139	181
369	365	794	345
0	0	0	0
0	0	0	0
0	0	0	0
0	0	0	0
0	0	0	0
882	650	1315	916
882	650	1315	916
260	345	273	71
0	0	0	0
2927	2256	8234	2425
0	0	0	0
0	0	0	0
0	0	19	0
34	0	0	0
4064	1969	6495	1846
0	0	0	0
0	0	0	0
0	0	0	32
0	0	0	0
0	59	78	20
0	0	0	0
0	0	0	0
0	0	0	0
0	0	0	0
0	0	0	0
133	370	552	582
123	0	207	0
260	380	174	108
0	0	0	0
0	0	0	0
0	0	0	0
4915	2258	3614	2192
0	0	0	0
0	0	0	0
0	0	0	0
0	0	0	0
5510	5637	12190	4083
0	0	0	0
160	159	48	38
0	0	0	0
0	0	0	0
0	0	0	0
157	131	347	117
0	0	0	0
0	25	17	0
0	8	73	0
0	0	0	0
108	0	0	89
0	0	0	0
0	0	0	0
0	0	0	0
0	0	0	0
0	0	0	0
0	0	0	0
136	145	424	110
0	0	0	0
301	359	988	452
12	20	75	14
0	50	99	52
0	50	99	52
189	270	990	495
51	605	320	250
51	605	320	250
58	46	30	0
301	113	200	156
0	0	9	0
0	88	77	30
0	0	0	0
687	109	4083	863
272	432	749	237
0	0	0	0
0	0	0	0
21	17	220	0
1657	1758	5903	1922
0	0	0	0
0	0	0	0
0	0	0	0
0	0	0	0
0	0	0	0
0	36	94	0
0	222	322	23
0	0	0	0
0	0	0	0
332	359	944	516
37	60	393	0
0	0	0	0
0	0	0	0
104	28	73	0
258	176	214	92
0	0	62	0
0	0	0	0
3545	1910	5004	4242
0	0	0	0
46	47	150	22
0	0	0	0
0	0	0	0
0	0	0	0
47	143	199	116
0	0	0	0
0	0	0	0
0	0	0	0
361	315	1023	118
0	0	0	0
0	0	0	0
0	0	0	0
350	61	628	127
0	0	58	15
0	0	0	0
0	0	0	0
0	0	0	0
0	0	0	0
0	14	0	15
51	30	337	0
11	0	259	257
242	84	256	110
11	34	266	29
109	1218	402	314
125	198	436	443
0	0	113	118
1223	1605	2303	1328
0	35	62	36
0	0	0	0
0	14	28	0
0	0	155	17
0	95	147	411
0	0	0	0
0	49	896	302
55	0	154	30
531	879	1115	726
50	13	0	0
69	141	269	34
0	0	0	0
89	71	23	128
0	0	0	0
0	0	0	0
119	0	62	195
59	198	0	27
0	0	0	0
0	0	0	0
0	0	0	0
0	18	122	19
2964	1862	3387	1715
278	291	361	106
0	0	0	0
0	0	0	0
0	0	0	0
0	0	0	0
0	0	0	0
0	0	89	0
0	0	0	0
0	0	0	0
0	26	407	133
0	0	0	0
0	221	263	91
0	0	29	23
203	115	366	214
0	0	0	0
12	19	0	20
0	0	0	0
157	21	274	64
0	0	0	0
215	342	680	194
0	0	0	0
0	0	0	0
0	34	89	69
0	0	0	0
0	0	0	0
0	0	0	0
0	0	92	0
51	55	162	0
0	0	0	0
0	11	44	0
154	291	337	180
0	0	0	0
0	0	0	0
0	0	0	0
0	0	0	0
0	0	0	0
0	44	0	0
0	0	0	0
0	0	0	0
0	0	0	0
10	16	0	17
0	0	0	0
0	0	0	0
0	0	0	0
0	0	0	0
0	0	0	0
0	0	0	0
0	165	339	0
0	0	0	0
0	0	0	0
214	113	620	93
0	0	0	0
0	0	0	0
44	348	575	145
0	62	0	0
0	0	0	0
23	0	0	0
0	0	0	0
129	462	215	0
81	0	64	0
0	0	0	0
46	12	146	13
0	0	0	0
0	0	0	0
0	0	0	0
0	62	99	21
0	0	0	0
16	0	0	0
1831	4111	6900	5037
1943	994	4916	1113
0	0	0	0
17	69	109	0
72	0	151	20
51	20	50	0
0	0	0	0
54	0	78	0
33	0	35	0
0	0	0	0
0	0	0	0
0	0	0	0
0	0	0	0
0	0	0	0
0	0	0	0
0	0	0	0
0	0	0	0
0	0	0	0
0	0	0	0
17	120	158	55
0	0	0	0
0	0	0	0
0	0	0	0
0	0	0	0
0	0	0	0
138	466	290	57
0	0	0	0
0	0	0	0
0	0	0	0
0	0	66	0
0	0	0	0
0	0	0	0
0	0	0	0
417	52	484	108
1479	1024	4964	1942
6625	6014	12788	4777
1479	1024	4964	1942
175	278	597	215
248	507	774	203
0	0	0	0
638	1086	2199	747
638	1086	2199	747
638	1086	2199	747
638	1086	2199	747
0	0	0	0
0	0	0	0
0	0	0	0
2015	2106	3219	1307
0	9	0	0
0	118	261	81
0	225	284	203
0	0	0	0
0	0	0	0
0	0	0	0
244	340	256	0
0	0	0	0
0	0	0	0
0	0	0	0
2753	2707	5161	1768
3063	1480	4301	2782
0	0	0	0
0	0	0	0
178	732	419	119
0	0	0	0
0	0	0	0
0	0	0	0
0	0	0	0
0	0	0	0
0	0	19	0
435	0	114	178
0	0	0	0
0	0	0	0
0	137	0	0
0	0	0	0
48	0	114	102
0	0	0	0
286	739	743	300
248	507	774	203
0	0	0	0
0	0	0	0
0	0	0	0
0	6	15	6
1229	407	3384	839
0	0	0	0
0	0	0	0
21	0	106	0
0	0	0	0
0	0	0	0
1229	407	3384	839
1229	407	3384	839
1229	407	3384	839
0	0	0	0
0	0	0	0
0	0	0	0
0	0	0	0
0	0	0	0
444	407	869	461
0	0	0	0
0	0	62	0
0	0	0	0
0	0	0	0
0	0	0	0
1780	2212	4645	1103
787	210	945	767
0	0	0	0
0	0	0	0
0	0	0	0
0	0	0	0
0	0	0	0
0	0	0	0
0	0	0	0
0	0	0	0
0	0	0	0
0	0	0	0
0	0	0	0
461	46	61	142
0	0	0	0
69	27	58	73
0	0	0	0
0	0	0	0
1748	1149	2973	1185
0	29	210	45
0	0	0	63
309	295	844	253
309	295	844	253
0	0	0	0
526	320	1294	324
359	910	3941	1047
0	0	0	0
1075	547	2546	994
0	91	30	0
0	0	0	0
68	909	1190	244
0	0	0	0
0	0	0	0
0	0	0	0
0	0	0	0
0	0	0	0
0	0	0	0
151	436	995	114
0	0	10	0
0	0	0	0
0	0	0	0
531	94	619	290
0	0	0	0
0	7	0	7
81	149	310	176
0	0	0	0
50	0	0	41
0	0	0	0
6	0	25	0
0	0	0	0
49	20	41	61
49	20	41	61
0	0	0	0
0	0	0	0
0	0	0	0
0	0	0	0
0	0	0	0
0	0	0	0
65	397	433	89
0	34	498	212
0	0	0	0
0	0	0	0
0	0	0	0
0	0	0	0
720	417	0	0
0	0	0	0
301	57	65	84
0	0	0	0
0	0	0	0
246	196	1395	403
104	9	109	0
0	0	0	0
0	0	0	0
438	311	1395	192
438	311	1395	192
0	0	0	0
0	0	0	0
0	0	0	0
0	0	0	0
0	0	100	0
129	51	238	212
0	0	0	0
0	0	0	0
0	0	0	0
0	0	0	0
0	0	0	0
0	0	0	0
0	0	0	0
0	0	0	0
0	0	0	0
260	345	273	71
0	0	0	0
0	0	0	0
0	0	0	0
0	0	0	0
0	0	0	0
0	0	0	0
0	0	0	0
0	0	0	0
341	256	406	422
0	0	0	0
0	0	0	0
0	0	0	0
0	26	309	27
0	0	0	0
468	0	995	326
0	0	0	0
0	0	0	0
0	0	0	0
0	0	0	0
0	0	0	0
0	0	0	0
0	3	0	0
0	0	0	0
0	0	0	0
0	0	0	0
0	0	0	0
53	10	55	129
0	0	0	0
0	0	0	0
0	0	0	0
0	0	0	0
0	0	0	0
0	0	0	0
0	0	0	0
0	0	0	0
0	0	0	0
0	0	0	0
0	0	0	0
90	24	252	0
0	0	0	0
0	116	26	80
0	0	0	0
0	0	0	0
0	0	0	0
0	0	0	0
0	0	0	0
0	0	0	0
0	0	0	0
0	0	0	0
0	0	0	0
0	0	0	0
0	0	0	0
1041	1030	1816	466
0	0	0	0
0	0	0	0
0	40	186	166
417	189	937	171
246	203	279	76
0	0	0	0
0	14	91	28
0	0	0	0
0	0	0	0
0	0	68	0
0	0	0	0
0	0	0	0
0	0	0	0
24	58	51	0
0	0	0	0
0	0	0	0
0	0	0	0
36	144	152	89
0	0	0	0
170	270	982	244
1707	1942	4041	727
20	0	64	17
0	0	0	0
0	0	0	0
0	0	0	0
0	0	0	0
224	364	374	208
0	0	0	0
0	0	0	0
0	0	0	0
0	0	0	0
0	0	0	0
47	0	173	0
0	80	0	28
0	0	0	0
0	0	0	0
0	0	0	0
0	0	0	0
0	0	0	0
0	0	0	0
89	165	561	268
0	0	0	0
0	30	20	8
268	504	691	180
0	0	0	0
0	0	0	0
0	0	0	0
0	0	0	0
0	0	0	0
0	0	0	0
0	0	0	0
0	0	0	0
0	0	0	0
0	0	0	0
0	0	0	0
0	0	0	0
761	633	831	329
0	0	0	0
383	304	381	264
57	0	0	0
0	0	15	12
0	0	0	0
0	0	0	0
0	0	0	0
0	0	0	0
0	0	0	0
0	0	200	0
16	0	17	0
0	0	0	0
0	0	0	0
0	0	0	0
0	0	0	0
0	0	0	0
0	0	14	0
0	0	0	0
0	0	0	0
0	0	0	0
0	0	0	0
0	0	0	0
0	0	0	0
0	0	0	0
119	0	99	155
0	0	0	0
233	475	184	96
0	0	25	20
0	0	0	0
0	0	189	0
0	0	0	0
0	0	0	0
17	0	18	14
0	0	0	0
0	288	88	46
0	0	0	87
0	0	0	0
0	0	0	0
0	0	0	0
0	0	0	0
0	0	0	0
0	0	0	0
0	0	0	0
0	0	0	0
0	0	0	0
0	0	0	0
63	101	666	156
0	0	0	0
0	0	0	0
0	0	0	0
0	0	0	0
0	0	0	0
0	0	0	0
88	56	480	58
0	0	0	0
176	157	220	66
0	0	0	0
0	0	0	0
0	0	0	0
0	0	0	0
0	0	0	0
0	0	0	0
0	0	0	0
248	293	283	23
132	148	366	107
0	0	0	0
0	0	0	0
0	0	0	0
0	0	0	0
0	0	0	0
0	0	0	0
0	365	85	113
0	0	0	0
0	0	0	0
46	18	24	0
24	132	150	0
0	0	0	0
0	0	0	0
20044	11206	30026	12388
19377	11206	28434	12234
215	213	451	330
215	213	451	330
0	0	30	0
0	0	0	0
0	0	0	0
0	0	0	0
0	0	0	0
0	0	0	0
809	831	1639	1105
809	831	1639	1105
0	0	0	0
0	0	0	0
0	0	0	0
0	0	0	0
0	0	0	0
0	0	0	0
1878	390	2320	900
0	0	0	0
317	294	1054	433
0	0	0	0
0	0	0	0
0	0	0	0
0	0	0	0
47	0	26	0
0	0	0	0
0	0	0	0
51	136	181	77
0	0	0	0
0	0	0	0
0	28	198	52
0	0	0	0
207	144	114	74
11484	11626	64412	22260
0	0	0	0
0	0	0	0
119	0	62	195
0	0	0	0
119	0	62	195
2945	1278	5924	1500
0	0	0	0
0	0	35	0
0	0	0	0
0	0	0	0
1422	1657	3498	1545
1611	1704	6005	2021
0	0	0	0
0	332	0	0
99	79	0	243
99	79	0	243
0	0	0	0
3503	4282	6504	1546
32655	40776	113321	37921
245	278	110	86
0	0	0	0
2122	6153	20143	4154
94	226	346	172
166	0	0	0
879	242	1299	559
0	0	0	0
546	1157	3532	522
0	0	0	0
78	62	356	171
0	0	0	0
0	0	0	0
0	0	0	0
0	0	0	65
0	0	0	0
0	0	0	0
0	0	0	0
0	0	0	0
0	0	0	0
0	0	0	0
0	0	0	0
0	0	0	0
0	0	0	0
0	0	0	0
0	0	0	0
0	102	22	47
0	303	285	0
0	303	285	0
90	100	150	48
0	0	0	0
0	0	0	0
0	0	0	0
0	0	0	0
0	0	0	0
0	0	0	0
0	21	28	11
0	0	0	0
373	425	277	223
0	0	0	0
0	0	0	0
0	0	0	0
0	0	0	0
477	596	1216	894
0	0	0	0
0	0	0	0
687	421	446	217
962	1397	1265	317
364	0	396	244
10760	9680	30106	8081
0	0	26	20
16105	20874	24811	15822
0	0	0	0
486	900	278	535
0	0	0	0
0	0	0	0
0	0	0	0
372	59	857	518
0	0	0	0
0	0	0	0
0	0	0	0
0	0	0	0
0	14	19	15
196	82	308	42
241	109	434	85
258	778	1297	549
40	21	255	44
1160	897	855	668
0	0	0	0
0	0	0	0
0	0	0	0
0	0	0	0
0	533	541	634
0	0	0	49
51	20	0	21
0	134	284	0
131	454	412	215
780	809	2325	489
3912	2195	3882	980
0	0	0	0
151	279	316	247
0	0	0	0
0	0	0	0
5146	4990	7824	2835
600	627	960	553
0	0	0	0
0	80	244	221
0	0	0	0
0	0	0	0
0	0	0	0
0	0	0	0
40	111	305	0
96	26	34	0
22	18	23	0
1160	897	855	668
21	17	220	0
0	0	0	0
0	0	0	0
0	0	0	0
0	0	0	0
0	0	0	0
0	0	0	0
0	0	0	0
0	0	0	0
0	0	0	0
33	53	35	0
114	45	209	23
0	0	0	0
229	279	708	354
0	0	0	0
396	577	1069	966
0	0	0	0
0	0	0	0
0	0	0	0
262	69	46	0
129	462	68	0
0	0	0	0
0	0	0	0
0	0	0	0
0	0	0	0
96	0	0	0
0	0	93	109
18	170	37	102
295	147	271	181
0	0	0	0
426	427	964	215
503	328	728	498
0	0	0	0
284	201	0	0
0	0	0	0
0	0	0	0
677	800	1948	712
31	134	164	142
156	86	158	307
600	1028	1534	1414
31	134	164	142
500	17	205	196
0	0	0	0
0	0	0	0
[truncated: 1,185 more rows]

## Sheet: BACCAC_16days
3817	4222	14780	13164
1011	535	1815	6654
5787	3923	7626	16864
0	0	0	0
1185	1321	7095	6199
345	385	333	4067
0	0	0	232
105	0	102	101
80	0	0	0
0	17	47	368
176	35	62	409
0	0	0	0
0	75	225	163
2393	1750	5594	19978
0	0	0	0
14052	8086	14668	41826
36	0	30	16
579	141	71	239
262	58	107	561
0	0	0	0
0	0	0	0
28412	15645	13879	29906
184	46	65	203
84	0	23	0
622	438	703	875
0	0	0	0
227	45	180	976
679	611	833	983
195	157	319	460
0	72	34	79
195	180	743	2150
123	195	60	348
205	60	112	702
2993	1631	2304	7025
205	188	992	1380
853	982	5720	5246
393	231	376	1069
0	149	162	1083
44	51	38	980
12457	9623	15086	51085
161	189	73	529
349	0	284	1884
40	185	174	839
850	464	1282	5860
0	0	0	0
152	115	294	571
1315	731	2043	3916
407	0	286	449
0	0	0	0
21	37	17	534
0	0	0	0
595	233	421	2253
0	0	0	0
1354	932	1512	5400
179	70	49	565
1426	955	1895	5741
145	87	166	621
655	282	677	4079
32	0	13	62
384	79	962	3005
12	113	29	45
31	12	101	344
0	0	0	0
0	0	0	0
1461	585	926	6670
919	247	328	1601
0	0	45	0
27	16	98	424
1381	676	1481	3188
8	151	319	1501
661	25	356	415
109	0	150	840
71	9	25	171
0	0	0	0
0	0	0	0
114	11	31	343
52	69	215	708
0	0	0	0
387	367	376	1062
0	0	0	18
1151	619	969	4327
1011	751	1156	2032
1958	970	1960	3842
4436	2692	7787	26949
3534	2204	4315	11721
0	140	65	68
603	455	936	1589
129	47	265	680
0	0	26	245
495	446	401	1760
0	0	0	0
0	0	0	0
112	0	0	181
2414	1725	2690	7499
252	115	430	892
259	213	354	356
0	0	0	0
28	10	0	91
14	0	67	141
0	0	0	0
97	221	111	313
0	0	0	0
0	93	0	226
141	93	838	1906
125	35	29	215
23	0	2	96
574	87	491	1720
10	0	51	107
23	50	210	385
35	0	0	0
313	564	269	2293
0	0	0	0
0	0	0	0
1165	986	2087	7190
2721	2483	4566	12370
74	43	161	1004
0	0	0	0
169	39	182	619
0	0	0	0
0	98	198	0
3265	1666	3266	4970
1468	309	1095	3735
816	436	741	3153
30	0	0	172
470	365	729	3262
129	104	184	353
77	456	462	355
0	0	51	201
119	42	164	260
9	15	173	328
288	89	424	426
1672	819	942	1817
0	53	20	0
77	81	151	0
1375	700	1929	5034
191	120	89	631
86	504	282	1113
439	77	0	0
0	0	0	0
41	82	157	458
0	0	0	0
0	0	0	0
0	0	7	68
1778	1151	1848	9526
2	0	10	13
0	0	0	0
0	27	76	514
6927	4900	9314	13077
0	0	0	0
0	0	25	116
125	102	381	1011
0	0	14	98
310	363	804	1660
198	87	365	1147
111	80	106	567
0	27	76	514
0	0	18	0
188	132	446	291
0	0	0	0
0	0	0	0
0	0	0	0
267	126	505	554
0	0	0	0
0	0	0	0
28	0	258	1633
593	371	582	2557
562	361	830	3789
0	0	0	0
0	0	0	0
123	77	0	992
0	0	0	0
250	0	19	293
0	0	0	0
143	70	156	429
15	24	45	129
0	0	0	0
299	129	147	867
0	0	0	0
0	0	0	0
959	501	920	3150
265	156	1055	3302
1471	509	2093	7362
994	689	558	2630
2106	602	2077	3297
0	0	0	40
0	0	0	0
7030	4052	4437	8775
430	219	805	650
0	0	25	127
52	0	33	0
41	73	0	0
0	0	0	0
0	0	0	0
0	0	0	0
378	280	865	1321
46	73	68	142
0	0	0	0
199	66	450	0
0	21	0	272
428	290	540	848
0	0	0	0
1935	1339	2350	5514
188	95	83	762
0	0	0	0
1047	762	1463	2846
77	136	127	757
0	0	0	0
49	28	476	1049
355	97	381	542
0	35	0	0
6	37	44	248
934	547	664	1856
0	0	0	9
117	51	261	526
0	100	25	277
0	0	0	112
605	484	496	1912
257	151	257	734
606	407	1988	5351
266	66	428	637
0	0	0	0
0	0	0	0
374	331	853	3717
83	74	154	215
179	256	100	627
297	95	35	266
1318	214	440	322
0	0	0	0
0	0	0	0
0	0	0	0
0	72	53	76
71	0	0	13
0	0	0	0
1344	484	663	4902
0	0	0	0
14747	8768	16151	44798
148	158	195	955
17	0	42	0
306	360	1510	3844
34	142	0	217
0	0	52	298
0	0	0	0
0	136	32	50
408	324	235	1504
278	160	251	1178
4	0	15	398
0	0	0	0
0	0	0	0
547	296	648	1326
1	0	4	45
123	33	122	1325
1294	332	1018	5771
0	0	0	0
883	130	984	3127
0	0	0	0
0	0	0	0
547	512	1329	2674
431	282	930	1466
0	0	9	28
0	5	10	124
140	179	157	525
1618	292	1094	4087
585	225	621	1507
361	118	567	1707
758	459	361	2977
12595	8735	9081	21679
169	0	207	705
30	0	26	21
0	0	1	0
20	18	82	616
1458	1167	2159	2781
131	91	23	57
501	393	362	665
273	126	160	284
0	0	0	99
2593	2225	7240	27115
0	0	0	0
82	12	75	0
1034	73	1492	5963
22	58	18	0
0	54	50	79
0	0	0	0
107	47	396	1324
0	0	0	0
61	0	135	178
0	48	118	1251
0	0	121	809
248	0	116	46
0	0	0	0
0	0	0	0
577	326	819	3875
56	98	733	2554
0	0	0	0
597	429	1064	2602
275	104	998	1162
0	0	0	0
1557	1286	3610	8326
344	262	199	836
1111	938	1561	4960
569	410	42	333
148	0	127	511
104	460	557	1614
104	460	557	1614
11985	8051	15507	19335
17	0	14	118
6712	4805	9160	12765
449	1442	1144	5830
0	0	20	0
56	131	168	599
831	636	1592	3813
4712	4003	6728	31738
0	0	0	0
23	50	67	90
0	0	0	0
456	302	838	3204
355	280	756	893
4466	2310	2506	8875
46	48	13	0
76	119	523	1590
0	0	0	0
283	104	213	456
3076	685	4859	11755
0	54	50	79
78	86	110	0
257	28	0	0
0	125	193	1274
0	0	0	0
0	0	0	0
418	136	1025	1433
0	31	288	497
118	41	250	805
6150	2946	10135	40648
16	28	13	142
0	0	0	0
632	418	461	1899
0	0	32	120
138	121	353	658
0	0	0	0
91	187	149	896
262	47	280	1089
41	14	50	738
152	194	278	622
49	0	13	105
0	0	0	0
0	0	0	0
106	93	367	407
66	17	144	317
74	22	20	0
210	167	190	271
13	6	0	8
9	0	4	0
0	0	115	31
10	2	12	83
0	2	0	0
13	66	31	226
144	508	789	2477
0	0	0	0
1247	780	968	5231
0	0	0	0
0	170	500	1033
0	0	0	0
51	0	62	496
3	0	11	0
225	18	375	1076
0	0	0	0
5223	3471	9819	34660
0	0	0	0
273	0	8	364
1682	886	1182	2559
0	0	0	0
1530	441	1704	4100
0	8	8	0
97	28	77	0
178	126	369	443
2564	807	1631	6052
0	0	0	0
283	80	159	821
0	0	0	0
15	0	13	0
0	0	13	0
36	13	65	121
1738	487	649	3322
0	0	0	0
0	0	0	0
1500	342	298	4734
0	0	0	0
233	70	108	1887
102	90	306	131
366	56	477	813
241	358	502	1157
97	129	60	282
97	129	60	282
0	0	12	19
502	405	1151	4585
19	0	168	264
1410	631	1449	6587
0	0	0	0
0	0	0	0
0	0	0	0
62	14	13	201
0	0	20	142
101	119	743	974
0	0	0	0
0	0	0	0
123	195	60	348
0	0	0	0
5355	8281	6532	27123
25	0	21	391
1151	619	969	4327
104	55	222	321
56	98	733	2554
0	0	0	0
24	63	39	0
729	242	797	3277
38	0	5	37
0	0	0	0
0	0	0	0
214	306	911	1491
236	283	499	1430
90	79	148	376
0	0	0	0
224	325	890	807
0	0	86	0
0	0	44	184
0	0	0	0
0	9	0	0
176	236	160	310
3412	2166	3149	6262
0	61	0	199
110	0	18	567
187	152	83	324
1281	1393	2048	4321
875	568	659	1434
171	52	518	1186
0	0	0	0
123	43	101	1017
1424	264	1229	5596
23	51	48	433
0	0	0	0
138	52	290	632
36	0	21	0
0	0	0	0
98	108	242	886
0	0	0	0
179	123	114	179
0	23	0	0
0	0	0	0
0	0	0	36
64	0	53	0
5	32	47	195
0	0	0	0
119	59	212	742
82	20	37	144
1113	674	991	5737
0	0	0	0
0	0	0	0
15	0	48	171
207	162	419	927
1330	855	1628	3098
220	162	211	2503
734	313	1447	3021
0	0	10	0
165	45	52	686
213	111	284	1598
65	58	54	463
328	289	328	656
139	137	148	771
197	72	236	2694
0	0	0	0
0	0	0	0
313	112	562	399
358	459	454	608
0	0	0	0
0	0	0	129
0	0	0	0
208	621	1042	3312
57	0	46	73
148	0	61	159
0	0	0	0
0	0	0	0
0	0	0	0
0	0	0	0
113	199	232	364
2229	897	3759	6708
0	0	24	0
0	0	0	0
197	50	208	1342
0	0	11	0
38	0	5	37
0	0	18	99
10	17	39	0
0	0	6	0
152	80	123	52
0	0	0	0
12	10	10	30
12616	8754	9110	21853
0	17	0	247
0	0	0	0
28	25	151	37
38	0	47	642
137	52	85	754
0	0	0	0
0	0	13	0
0	0	76	416
502	132	423	398
0	0	0	0
0	0	0	0
0	0	106	1440
83	40	49	343
0	0	274	143
0	0	0	0
19	148	161	916
0	10	18	125
357	180	209	246
0	0	0	0
7	24	139	313
0	0	0	0
0	0	0	0
0	0	0	0
40	6	22	0
85	100	104	1548
262	180	622	525
51	26	36	75
146	112	176	1008
305	0	322	570
0	0	0	0
523	56	709	2177
249	256	306	1309
0	0	0	0
32	57	53	1118
37	18	67	144
0	0	0	0
0	15	42	121
0	0	14	27
0	0	0	0
0	0	0	0
592	429	1803	4699
91	16	15	0
153	115	249	412
239	0	74	0
0	0	0	0
0	0	0	0
64	0	7	398
181	99	194	1470
0	0	0	0
1471	660	2375	7362
11	9	17	96
12	10	0	0
2677	1515	2717	7576
0	0	0	0
69	0	310	530
0	0	0	0
0	0	0	0
343	53	371	1549
0	0	0	0
0	0	10	0
0	0	0	0
605	484	496	1912
434	307	264	2659
1572	1404	1925	6203
0	0	0	0
0	0	0	0
12	10	48	62
128	43	145	406
87	0	36	0
0	0	0	0
182	80	270	687
0	0	0	0
0	0	0	0
200	252	164	1140
3179	2366	4238	10114
118	156	258	379
152	0	580	1822
38	0	0	0
0	0	0	0
16	0	32	204
0	0	0	0
0	0	0	0
0	0	0	326
0	0	0	0
318	140	359	665
638	280	755	1761
0	0	0	0
863	217	573	1376
92	13	62	97
1358	435	911	1049
0	0	0	0
60	0	16	337
54	16	15	0
0	0	0	0
1696	514	1667	3398
75	72	46	99
9	20	35	0
0	0	0	0
0	0	0	0
0	0	68	0
0	0	0	0
8	2	2	0
365	31	222	980
0	0	0	0
954	819	896	4000
0	0	0	0
0	0	0	0
439	77	0	0
246	186	58	1178
0	0	0	0
0	0	0	0
24	0	0	0
24	0	0	0
0	0	76	0
56	25	57	197
17	99	77	200
74	0	21	493
51	60	98	570
785	435	1927	4407
207	216	442	1148
130	167	48	350
0	0	0	0
0	0	0	0
0	0	0	323
35	0	0	0
20	143	150	0
0	0	0	0
1918	970	1825	9498
0	0	0	0
0	0	0	0
152	97	214	942
61	61	137	439
68	87	228	405
0	0	0	0
2414	1725	2690	7499
0	0	29	76
3253	1133	4143	11981
19	101	78	319
145	85	238	529
0	0	0	0
0	0	11	68
21	0	0	216
18	0	7	0
326	164	38	1260
199	175	490	1090
1758	1117	2389	8413
270	0	663	1388
0	0	0	0
287	70	99	483
174	131	507	288
0	11	30	0
0	0	6	47
0	0	0	0
0	0	0	76
642	517	516	1912
0	0	9	0
0	0	0	0
1022	453	1465	3603
1461	585	926	6670
799	0	164	322
37	0	46	651
0	0	0	0
0	0	0	0
0	0	1	2
0	0	0	0
0	26	106	1389
0	0	50	0
0	0	0	0
0	0	0	0
37	0	46	651
1529	1417	3426	11242
0	0	0	0
439	77	0	0
0	0	10	0
0	0	0	0
0	136	32	50
1105	620	1804	3954
0	83	0	0
430	353	867	4021
0	0	0	0
629	177	695	2151
0	0	0	0
88	21	192	436
0	0	0	0
0	0	0	0
0	0	109	0
36	0	30	16
113	40	380	591
0	0	0	0
39	155	96	780
0	19	71	168
128	0	175	441
290	85	215	0
35	15	29	228
0	0	0	0
0	0	0	0
45	0	9	0
0	0	0	0
0	0	0	0
196	14	121	968
316	283	571	461
0	0	0	0
0	0	0	0
222	300	643	1426
55	0	0	534
0	0	0	0
0	0	0	0
1364	730	1253	5925
0	0	0	0
0	59	0	21
0	0	0	0
20	72	67	79
108	123	221	305
0	0	21	266
0	0	0	0
0	0	17	200
0	0	0	0
148	20	311	924
0	0	67	0
2791	2395	2491	4992
176	0	29	386
0	0	0	0
0	0	0	0
0	107	133	992
602	139	615	1304
0	0	0	0
38	66	31	518
71	0	26	52
10	25	13	0
0	0	0	0
41	0	50	738
56	0	92	0
0	0	0	0
140	31	57	854
1358	435	995	1049
3368	2199	6807	20410
1335	446	726	3711
0	0	0	0
158	40	56	87
0	0	0	0
3845	1517	5123	13241
0	0	0	0
41	0	0	0
0	22	0	80
0	0	0	0
0	0	0	0
182	89	50	286
34	0	83	346
0	0	0	0
16	0	55	22
212	0	191	410
0	0	0	0
0	0	0	0
0	0	0	0
0	0	0	0
36	115	242	1518
0	0	0	0
213	165	236	250
0	0	0	0
0	0	0	0
0	10	85	0
993	631	1135	6138
11	76	9	98
0	0	0	0
0	0	0	0
352	343	784	2352
45	32	29	46
0	0	0	0
0	0	0	0
0	0	0	0
45	3	27	0
0	0	0	0
238	117	152	1053
0	0	0	372
56	0	15	478
0	0	7	183
0	0	0	0
18	0	7	0
0	0	0	0
0	0	0	0
37	0	58	468
0	57	134	587
170	131	87	655
313	476	370	2725
0	0	0	0
0	0	0	0
15	26	36	38
0	0	0	0
219	199	254	1249
0	0	0	0
0	0	0	0
0	0	0	0
0	0	0	0
0	0	0	0
0	0	0	0
0	0	0	0
0	0	0	0
0	0	0	0
0	0	0	0
35	0	0	0
0	67	125	345
105	111	52	0
0	0	0	0
0	0	0	0
0	0	0	0
0	0	0	0
0	0	0	0
0	0	0	0
85	0	243	163
0	0	0	0
0	0	0	0
0	0	0	25
877	405	1219	3439
0	0	0	0
140	0	0	0
0	0	0	0
0	0	0	0
143	0	411	783
0	0	0	0
244	96	267	524
0	0	0	0
0	0	22	212
0	0	0	0
0	31	0	0
0	0	0	0
850	433	1056	4573
565	284	176	900
566	535	1729	2371
0	13	19	19
0	0	37	0
0	0	0	0
26	253	43	606
0	0	0	0
0	0	0	0
191	210	781	1349
206	0	239	1038
239	16	151	308
810	337	369	3127
66	0	11	864
0	0	0	0
0	0	0	0
0	0	0	0
0	0	0	0
0	0	0	0
91	0	119	0
0	0	0	0
0	0	0	0
27	6	56	26
586	237	795	4481
2232	1111	1004	1340
0	0	0	0
0	70	553	1474
0	0	0	0
0	0	0	0
0	0	0	0
0	0	0	0
0	0	0	0
175	132	308	870
1092	896	2259	6755
68	45	41	265
0	0	0	0
1175	605	3377	9521
88	19	144	312
0	0	0	0
0	0	0	0
0	50	0	0
495	194	1398	4815
58	0	59	280
2846	1990	2677	16753
0	0	0	0
525	668	1771	4283
196	191	131	569
5355	8281	6532	27123
0	0	0	0
8	21	13	164
0	0	0	0
0	0	0	0
0	0	0	0
0	0	0	0
27	0	74	0
154	60	24	592
600	529	637	752
0	0	0	0
58	0	48	207
54	24	10	16
100	132	110	86
123	303	202	0
172	151	188	461
4	0	7	0
210	84	198	1438
48	0	39	0
0	0	0	0
0	0	0	378
0	0	0	0
106	0	32	683
47	62	154	423
145	16	148	233
569	410	42	333
0	0	0	0
0	0	0	0
0	0	0	0
0	0	36	38
64	141	131	371
24	63	39	0
0	0	0	0
34	0	71	66
276	311	735	2511
43	95	0	0
6	20	0	22
0	0	0	0
0	0	0	0
84	172	320	1019
0	0	0	0
0	0	203	319
0	0	0	0
0	0	40	0
0	44	137	258
685	319	660	1348
0	0	0	0
46	0	81	826
0	0	0	0
0	0	0	0
0	0	0	0
0	0	81	38
16447	9675	18218	52768
32	47	70	97
0	0	26	218
0	22	143	0
0	0	0	0
0	0	0	0
0	0	0	0
138	283	895	1596
0	0	0	93
37	0	38	36
0	0	0	132
0	33	62	64
0	0	69	0
0	56	117	224
231	255	308	3277
0	0	0	0
158	23	151	441
0	0	0	0
0	0	0	0
88	77	187	203
0	58	54	937
901	382	1834	2067
4747	3361	3189	4273
70	37	12	0
0	0	0	0
0	0	0	0
0	0	40	0
0	0	0	0
0	0	0	0
0	0	0	0
106	93	217	0
0	0	0	0
27	0	37	208
46	0	19	0
0	0	0	0
0	0	0	0
0	31	0	0
0	19	0	96
0	0	0	0
1938	659	3252	6352
0	0	0	0
120	15	112	88
2281	2472	3524	8951
0	0	0	0
24	99	147	783
0	12	0	51
0	0	0	0
165	218	282	283
0	0	0	0
261	167	156	0
47	0	15	61
0	0	0	0
0	0	0	0
216	114	35	0
106	93	217	0
0	0	0	0
0	0	0	0
118	26	72	265
858	1044	2792	1415
0	0	0	0
0	0	0	0
0	0	0	0
0	0	0	0
10	9	17	0
68	60	47	278
0	0	0	0
0	0	0	0
373	214	312	1348
0	0	0	0
9	25	15	119
0	0	0	0
0	0	0	0
0	0	0	0
0	0	0	0
576	54	174	946
0	0	0	0
0	0	0	0
0	0	0	0
0	0	0	428
0	0	0	0
289	127	213	447
0	0	0	0
0	0	0	0
58	51	48	451
0	0	0	0
0	0	18	0
0	0	0	0
0	0	0	0
0	0	0	0
0	0	0	0
26	35	54	119
255	127	372	2010
138	20	264	355
15	0	100	0
0	9	25	26
0	0	0	0
0	0	0	0
529	358	712	1275
555	349	683	561
44	19	198	226
0	0	0	0
134	44	234	1494
39	0	152	628
36	115	242	1518
0	0	0	0
0	0	0	0
65	211	357	2609
0	0	0	0
0	179	54	601
0	0	0	0
186	82	0	1258
109	0	150	840
0	0	0	0
0	0	0	0
0	0	0	0
0	0	0	0
605	484	496	1912
0	0	0	0
0	0	0	0
0	0	0	0
155	0	55	86
0	0	7	183
196	14	121	968
114	163	152	294
4466	2310	2506	8875
4466	2310	2506	8875
1465	1308	2045	10322
428	290	540	848
428	290	540	848
199	66	450	0
199	66	450	0
136	0	126	800
3663	1772	4360	12290
1077	836	1398	3809
28412	15645	13879	29906
1762	899	2553	6036
1762	899	2553	6036
606	407	1988	5351
123	77	0	992
169	39	182	619
816	436	741	3153
1519	820	1405	7395
703	384	664	4039
0	0	0	0
0	75	225	163
195	180	743	2150
39	0	96	550
1281	1393	2048	4321
1353	610	1205	2176
3534	2204	4315	11721
52	69	215	708
840	372	766	1082
3174	2191	3012	7250
959	501	920	3150
0	0	0	0
0	0	0	0
4269	3136	6324	30154
4269	3136	6324	30154
3247	911	5700	13735
98	108	242	886
98	108	242	886
14863	10860	10867	26452
2444	3687	13124	9681
64	0	7	398
2393	1750	5594	19978
185	325	832	713
0	0	0	0
61	13	147	506
19	101	78	319
5787	3808	7484	16864
553	132	486	531
430	219	805	650
430	219	805	650
430	219	805	650
1935	1339	2350	5514
632	418	461	1899
0	0	261	251
0	0	0	99
112	0	0	181
190	0	16	538
1471	509	2093	7362
0	0	0	0
224	179	157	437
0	0	106	1440
0	0	0	0
57	0	46	255
2564	807	1631	6052
112	33	122	985
118	156	258	379
0	0	0	0
4959	3448	5881	9941
349	0	96	999
57	0	46	73
0	0	0	0
2762	2446	5642	25632
0	0	0	0
510	60	363	2177
41	60	28	573
655	282	677	4079
0	0	0	0
0	0	14	608
0	0	0	0
0	0	0	0
1732	1078	1880	4728
19	0	15	276
0	0	50	0
0	26	133	171
0	0	0	0
1922	551	1319	4200
0	0	0	0
0	0	0	0
266	233	223	3128
439	272	347	1311
90	191	207	859
662	258	568	3518
58	49	24	0
0	0	26	0
140	74	597	1153
0	0	0	0
0	0	0	0
171	162	97	220
0	0	0	0
0	0	0	0
23	10	191	132
38	0	5	37
0	136	32	50
0	136	32	50
0	0	0	0
1335	864	1979	2815
788	324	1326	9052
2345	1610	4936	17378
380	670	1130	3549
80	0	0	0
0	0	0	0
217	112	261	1444
115	507	126	296
0	0	0	0
0	0	0	0
0	0	0	0
0	0	0	0
0	11	52	98
0	0	0	0
0	0	0	0
158	40	56	87
0	0	0	0
0	0	0	0
0	0	0	0
0	0	0	0
0	0	0	0
0	39	0	250
0	0	0	0
0	0	0	0
9	0	11	0
779	1327	992	5312
443	985	822	4380
0	0	0	0
67	32	104	197
0	0	0	0
0	0	0	0
0	0	0	0
107	71	131	2477
405	223	498	3225
0	0	0	0
0	0	0	0
21	0	43	109
794	233	697	2789
0	0	0	0
0	0	0	0
0	0	0	0
0	0	0	0
0	0	0	0
0	0	0	0
24	21	20	0
0	0	0	0
0	0	0	0
0	0	0	0
0	0	0	0
0	0	0	0
0	67	72	385
0	0	0	0
0	0	0	0
0	0	0	0
2106	602	2077	3297
0	125	193	1274
0	0	21	266
37	18	67	144
0	0	0	0
0	0	0	0
0	0	0	0
0	0	0	0
177	22	243	525
0	0	0	0
0	0	0	0
0	58	54	937
117	51	261	526
161	189	73	529
174	131	567	288
0	0	0	0
0	81	0	238
0	0	0	0
0	0	0	0
0	0	0	0
380	670	1130	3549
380	670	1130	3549
0	31	288	497
0	0	0	0
3745	1982	3584	10165
0	0	0	0
0	0	0	0
0	6	0	0
50	24	0	258
2749	1056	1695	5705
0	0	0	0
0	0	0	0
0	0	26	204
0	0	0	0
0	35	82	0
0	0	0	0
0	0	0	0
0	0	0	0
0	0	0	0
0	0	0	0
287	158	696	1103
137	34	130	1635
399	712	526	1041
0	0	0	0
0	0	0	0
0	0	0	0
3890	1641	1285	4451
0	0	0	0
0	0	0	0
0	0	0	0
0	0	0	0
5210	2739	6350	14130
0	0	0	0
185	71	362	95
0	0	0	0
0	0	0	0
0	0	0	0
135	101	198	270
0	0	0	0
0	0	0	215
0	28	0	134
0	0	0	0
0	26	72	1389
0	0	0	0
0	0	0	0
0	0	0	0
0	0	0	0
0	0	0	0
0	0	0	0
0	17	149	0
0	0	0	0
527	250	465	939
0	0	25	116
25	0	21	391
25	0	21	391
473	269	625	1158
197	72	236	2694
197	72	236	2694
0	0	0	0
141	34	63	768
0	0	0	0
119	0	122	0
0	0	0	0
333	0	455	619
151	181	642	2883
0	0	0	0
0	0	0	0
85	0	83	109
1208	711	2779	6014
61	0	0	0
0	0	0	0
0	0	0	0
0	0	0	0
0	0	0	0
37	49	104	71
90	0	351	290
0	0	0	0
0	0	0	0
527	250	475	939
91	187	149	896
0	0	0	0
0	0	0	0
56	49	0	0
195	92	159	328
0	0	0	346
0	0	0	0
1745	1769	2214	13733
0	0	0	0
49	86	41	254
0	0	0	0
0	0	0	0
0	0	0	0
92	20	88	384
0	0	0	0
0	0	0	0
0	0	0	0
262	180	622	525
0	0	0	0
0	0	0	0
0	0	0	0
225	68	230	1607
15	13	24	115
0	0	0	0
0	0	0	0
0	0	0	0
0	0	0	0
29	38	48	0
20	49	49	407
9	15	173	328
8	151	319	1501
0	15	42	121
265	156	1055	3302
403	59	413	691
0	0	48	485
2993	1631	2304	7025
5	0	19	0
20	0	22	61
7	0	0	9
34	15	98	0
134	24	307	0
0	0	0	0
0	0	924	1214
0	33	85	86
1574	409	792	4190
94	24	0	0
110	86	224	728
0	0	0	0
126	159	222	255
0	0	0	0
0	0	0	0
48	0	39	0
86	113	496	684
0	0	0	0
0	0	0	0
0	0	0	0
0	0	0	0
2998	1841	2752	7597
122	184	171	515
0	0	0	0
0	0	0	0
0	0	0	0
0	0	0	0
0	0	0	0
0	0	7	0
0	0	0	0
0	0	0	0
0	46	64	168
0	0	0	0
135	20	184	116
0	0	0	0
47	62	154	423
0	0	0	0
0	0	11	0
0	0	0	0
84	56	208	1059
0	0	0	0
494	368	695	732
0	0	0	0
0	0	0	0
0	0	0	0
0	0	0	0
0	0	0	0
0	0	0	0
18	0	29	91
43	25	23	110
0	0	0	0
101	0	18	115
99	43	242	742
0	0	0	0
0	0	0	0
21	0	0	0
0	0	0	0
0	0	0	0
0	0	0	0
0	12	0	0
0	0	0	0
0	0	0	0
0	0	20	0
0	0	0	0
0	0	0	0
0	0	0	0
12	0	0	62
0	0	0	0
0	0	0	0
19	18	168	264
0	0	0	0
0	0	0	0
546	243	248	296
0	0	0	0
0	0	0	0
366	321	711	944
0	0	0	0
0	0	0	0
0	0	0	0
0	0	0	0
418	0	139	1311
82	14	27	0
0	0	0	0
0	33	0	0
0	0	0	0
0	0	0	0
0	0	0	0
28	43	57	36
0	0	0	0
0	23	0	0
2527	1764	3072	6729
1247	758	1993	3654
0	0	0	0
14	12	0	0
99	0	0	0
31	0	59	223
0	0	0	0
0	41	0	0
14	0	0	35
0	0	0	0
0	0	0	0
0	145	58	0
0	0	0	0
0	0	0	0
0	0	0	0
0	0	0	0
0	0	0	0
0	0	0	0
0	0	0	0
14	48	78	104
0	0	0	0
0	0	0	0
0	0	0	0
0	0	0	0
0	0	0	0
418	393	297	1364
0	0	0	0
0	0	0	0
0	0	0	0
0	0	28	76
0	0	0	0
0	0	0	0
0	0	0	0
319	187	102	776
1315	731	2043	3916
6638	5739	8630	15227
1315	731	2043	3916
248	31	377	910
86	504	282	1113
0	0	0	0
883	130	984	3127
883	130	984	3127
883	130	984	3127
883	130	984	3127
0	0	0	0
0	0	0	0
0	0	0	0
2313	1432	1815	5081
46	0	45	0
0	159	66	387
0	65	302	758
0	0	0	0
0	0	0	0
0	0	0	0
0	0	121	0
0	0	0	0
0	0	0	0
0	0	0	0
2705	1572	2637	9665
1902	1467	1916	5111
0	0	0	0
0	0	0	0
693	104	525	2170
0	0	0	0
0	0	0	0
0	0	0	0
0	0	0	0
0	0	0	0
0	0	12	10
439	77	0	0
0	0	0	0
0	0	0	0
0	0	0	0
0	0	0	0
0	17	32	52
0	0	0	0
278	154	489	1202
86	504	282	1113
0	0	0	0
0	0	0	0
0	0	0	0
0	0	5	0
1034	73	1492	5963
0	0	0	0
0	0	0	0
0	0	14	0
0	0	0	0
0	0	0	0
1034	73	1492	5963
1034	73	1492	5963
1034	73	1492	5963
0	0	0	0
0	0	0	0
0	0	0	0
0	0	0	0
0	0	0	0
227	278	470	1645
0	0	0	0
0	0	26	122
0	0	0	0
0	0	0	0
0	0	0	0
2009	682	2071	5719
252	108	341	3504
0	0	0	0
0	0	0	0
0	0	0	0
0	0	0	0
0	0	0	0
0	0	0	0
0	0	0	0
0	0	0	0
0	0	0	0
0	0	0	0
0	0	0	0
376	164	38	1260
0	0	0	0
83	39	41	93
0	0	0	0
0	0	0	0
1509	901	1996	5704
15	0	48	171
0	0	0	0
799	0	164	322
799	0	164	322
0	0	0	0
1028	129	242	322
597	429	1064	2602
0	0	0	0
1113	233	652	4024
23	50	67	90
0	0	0	0
577	326	819	3875
0	0	0	0
0	0	0	0
0	0	0	0
0	0	0	0
0	0	0	0
0	5	0	0
203	391	330	2126
0	0	0	0
0	0	0	0
0	0	0	0
191	210	781	1349
0	0	0	0
0	0	0	0
87	19	249	558
0	0	0	0
0	0	22	17
0	0	0	0
15	30	16	50
0	0	0	0
179	53	82	205
179	53	82	205
0	0	0	0
0	0	0	0
0	0	0	0
0	0	0	0
0	0	0	0
0	0	0	0
141	170	317	136
46	0	367	627
0	0	17	0
0	0	0	0
0	0	0	0
0	0	0	0
709	155	114	884
0	0	181	0
71	48	18	58
0	0	0	0
0	0	0	0
318	140	359	665
47	8	77	0
0	0	0	0
0	0	0	0
452	556	368	2867
452	556	368	2867
0	0	0	0
0	0	0	0
0	0	0	0
0	0	0	0
0	56	47	41
131	46	86	404
0	0	0	0
0	0	0	0
0	0	0	0
0	0	0	0
0	0	0	0
0	0	0	0
0	0	0	0
0	0	0	0
0	0	0	0
0	31	288	497
0	0	0	0
0	0	0	0
0	0	0	0
0	0	0	0
0	0	0	0
0	0	0	0
0	0	0	0
0	0	0	0
234	92	277	395
0	0	0	0
0	0	0	0
0	0	0	0
132	47	65	442
0	0	0	0
39	0	152	628
0	0	0	0
0	0	0	0
0	0	0	0
0	0	0	0
0	0	0	0
0	0	0	0
0	0	0	0
0	0	0	0
0	0	0	0
0	0	0	0
0	0	0	0
0	0	70	0
0	0	0	0
0	0	0	0
0	0	0	0
0	0	0	0
0	0	0	0
0	0	0	0
0	0	0	0
0	0	0	0
0	0	0	0
0	0	0	0
0	0	0	0
97	64	0	405
0	0	0	0
79	0	64	202
0	0	0	0
0	0	0	0
0	0	0	0
0	0	0	0
0	0	0	0
0	0	0	0
0	0	0	0
0	0	0	0
0	0	0	0
0	0	0	0
0	0	0	0
299	415	720	2926
0	0	0	0
0	0	0	0
41	54	33	79
48	64	256	372
50	8	87	804
0	0	0	0
70	62	57	162
0	0	0	0
0	0	0	0
0	0	0	0
0	0	0	0
0	0	0	0
0	0	0	0
0	17	0	0
0	0	0	0
0	0	0	0
0	0	0	0
88	0	96	376
0	0	0	0
137	575	282	1615
1822	834	1615	3566
33	83	27	191
0	0	0	0
0	0	0	0
0	0	0	0
0	0	0	0
863	217	573	1376
0	0	0	0
0	0	0	0
0	0	0	0
0	0	0	0
0	0	0	0
0	0	109	0
61	0	17	340
0	0	0	0
0	0	0	0
0	0	0	0
0	0	0	0
0	0	0	0
0	0	0	0
24	0	59	124
0	0	0	0
23	7	19	107
177	17	242	178
0	0	0	0
0	0	0	0
0	0	0	0
0	0	63	0
0	0	0	0
0	0	0	0
0	0	0	0
0	0	0	0
0	0	0	0
0	0	0	0
0	0	0	0
0	0	0	0
783	481	1200	1943
0	0	0	0
358	459	454	608
0	0	0	708
47	0	10	0
0	0	0	0
0	0	0	0
0	0	0	0
0	0	0	0
0	0	0	0
154	102	0	0
0	0	11	0
0	0	0	0
0	0	0	0
0	0	0	0
0	0	0	0
0	0	0	0
0	0	9	0
0	0	0	0
0	0	0	0
0	0	0	0
0	0	0	0
0	0	0	0
0	0	0	0
0	0	0	0
0	67	204	345
0	0	0	0
258	310	360	975
25	0	0	0
0	0	0	0
0	33	21	387
0	0	0	0
0	0	0	0
14	48	0	0
0	0	0	0
0	20	92	29
0	0	0	0
0	0	0	0
0	0	0	0
0	0	0	0
0	0	0	0
0	0	0	0
0	0	0	0
0	0	0	0
0	0	0	0
0	0	0	0
0	0	0	0
205	90	168	2705
0	0	0	0
0	0	0	0
0	0	0	0
0	0	0	0
0	0	0	0
0	0	0	0
43	38	70	201
0	0	0	0
223	184	131	412
0	0	0	0
0	0	0	0
0	0	0	0
0	0	0	0
0	0	0	0
0	0	0	0
0	0	0	0
236	282	461	1523
225	143	262	981
0	0	0	0
0	0	0	0
0	0	0	0
0	0	0	0
0	0	0	0
0	0	0	0
136	69	194	865
0	0	0	0
0	0	0	0
56	0	92	0
38	0	47	642
0	0	0	0
0	0	0	0
12183	7450	13593	39028
12183	7312	13341	39028
0	115	142	0
0	115	142	0
12	10	0	0
0	0	0	0
0	0	0	0
0	0	0	0
0	0	0	0
0	0	0	0
1281	1393	2048	4321
1281	1393	2048	4321
0	0	0	0
0	0	0	0
0	0	0	0
0	0	0	0
0	0	0	0
0	0	0	0
525	668	1771	4283
0	0	0	0
171	226	841	1980
0	0	0	0
0	0	0	0
0	0	0	0
0	0	0	0
77	50	49	26
0	0	0	0
0	0	0	0
149	13	104	559
0	0	0	0
0	0	0	0
28	15	96	181
0	0	0	0
52	83	159	255
9407	4199	7716	54155
0	0	0	0
0	0	0	0
48	0	39	0
0	0	0	0
96	0	58	0
2299	1084	841	3002
0	0	0	0
18	0	7	0
0	0	0	0
0	0	0	0
1918	970	1825	9498
1746	1364	2531	6539
0	0	0	0
0	42	0	0
0	35	230	0
0	35	230	0
0	0	0	0
2722	1630	5445	15836
29712	18615	48484	125231
226	0	216	182
0	0	0	0
2468	3687	13183	9805
94	0	329	392
34	0	83	346
956	689	558	2630
0	0	0	0
1323	583	1205	2176
0	0	0	0
42	74	0	0
0	0	0	0
0	0	0	0
0	0	0	0
0	0	0	0
0	0	0	0
0	0	0	0
0	0	0	0
0	0	0	0
0	0	0	0
0	0	0	0
0	0	0	0
0	0	0	0
0	0	0	0
0	0	0	0
0	0	0	0
29	25	33	89
41	60	28	573
41	60	28	573
161	40	168	470
0	0	0	0
0	0	0	0
0	0	0	0
0	0	0	0
0	0	0	0
0	0	0	0
0	0	0	0
0	0	0	0
0	50	434	618
0	0	0	0
0	0	0	98
0	0	0	0
0	0	0	0
1156	194	768	1701
0	0	0	0
0	0	0	0
255	301	209	2083
1013	759	1777	3991
107	71	131	2477
9085	4590	12440	28444
60	0	16	337
17918	12004	12928	29576
0	0	0	0
430	353	867	4021
0	0	0	0
0	0	0	0
0	0	0	0
329	291	295	851
0	0	0	0
131	0	189	423
0	0	0	0
0	0	0	0
72	25	23	0
0	70	131	108
0	0	274	143
999	220	341	1125
65	58	54	463
684	870	893	2446
0	0	0	0
0	0	0	0
0	0	0	0
0	0	0	0
83	37	239	1019
0	0	0	0
0	72	34	79
55	12	22	0
141	93	838	1906
697	716	1392	3781
2228	911	2541	10724
0	0	0	0
0	107	133	992
0	0	0	0
0	0	0	0
5323	5008	6587	11311
906	407	762	3558
0	0	0	0
191	120	89	631
0	0	0	0
0	0	0	0
0	0	0	0
0	0	0	0
259	171	160	375
78	23	149	735
0	0	15	0
684	870	893	2446
85	0	83	109
0	0	0	0
0	0	0	0
0	0	0	0
0	0	0	0
0	0	0	0
0	0	0	0
0	0	0	0
0	0	0	0
0	0	0	0
0	47	66	0
138	20	264	355
0	0	0	0
174	115	357	365
0	0	0	0
678	313	911	2324
0	0	19	0
0	0	0	0
0	0	0	0
35	0	0	0
418	0	0	874
0	0	0	0
0	0	0	0
0	0	0	0
0	0	0	0
0	0	0	0
0	63	88	0
101	38	141	241
238	262	167	153
0	0	0	0
117	120	577	2087
356	220	401	1669
0	0	0	0
357	0	42	657
0	0	0	0
0	0	0	0
810	645	722	3071
78	51	64	725
348	44	261	423
1468	309	1095	3735
78	51	64	725
88	77	187	203
0	0	0	0
0	0	0	0
[truncated: 1,185 more rows]

## Sheet: BACCAC_27days
24515	8290	24402	7521
9317	3295	9872	9749
31103	8107	26436	19857
0	0	0	0
10772	4474	11432	5499
2738	1877	5203	1762
0	0	0	0
153	77	359	162
385	0	309	165
59	16	171	0
582	121	610	442
0	0	0	0
486	547	645	723
29058	10478	28876	23550
0	0	0	0
50670	19730	57299	42401
12	0	0	0
639	333	777	671
314	148	336	431
0	0	0	0
0	0	0	0
29210	14032	25671	12297
271	134	405	553
137	23	180	205
1941	1133	1250	837
0	0	0	0
1468	129	584	866
955	379	855	2522
1675	748	1208	702
63	0	0	508
4301	897	5234	3864
894	109	1009	152
164	57	718	731
12111	5999	11195	7545
2076	523	2772	1250
12569	4475	13151	2697
1911	911	1374	1054
1324	755	1056	937
462	153	238	416
40165	9610	34620	11519
533	76	412	265
1032	941	1577	1007
769	254	1349	703
4879	3095	7407	7041
0	0	0	0
885	303	1019	446
5122	2223	10723	5037
419	198	820	360
0	0	0	0
192	0	852	26
0	0	0	0
1490	592	1364	830
0	0	0	0
7366	3682	10832	6900
894	271	1432	617
11379	4523	8329	7436
441	159	321	106
3805	891	3690	1906
367	330	311	120
3405	909	2514	2160
144	476	628	404
446	105	727	513
0	0	0	0
32	0	13	0
3901	2543	7158	7807
1867	335	3472	1303
736	0	0	544
245	70	282	306
7048	2952	3630	2080
1333	473	2113	920
1059	182	2435	1097
603	234	1024	1334
242	113	419	227
0	0	0	0
0	0	0	0
144	50	144	141
1236	981	1983	389
0	0	0	0
973	0	1327	875
0	7	9	0
5845	1860	8005	3962
5395	3036	5564	1900
9605	5054	8262	3307
25713	8271	26795	17964
13312	5944	16280	9318
365	202	305	425
3556	936	1848	1842
1655	504	1093	667
295	135	285	0
1091	509	1747	940
0	0	39	0
0	0	0	0
203	335	829	70
8849	4121	8302	5096
2038	591	1412	1280
1192	911	332	1389
0	0	0	0
232	0	414	15
212	72	70	139
0	0	0	0
557	115	173	234
0	0	0	0
443	100	333	333
1125	330	2080	1003
302	174	278	116
166	83	37	0
1898	1110	905	963
140	0	0	0
691	254	1134	499
0	0	59	100
2798	1205	5063	2898
0	0	0	0
0	0	0	0
9237	3593	11799	7084
18783	6248	29820	14981
1286	341	2155	425
23	0	0	14
972	445	422	978
130	0	0	13
1307	355	321	551
11077	6128	10105	6988
4468	1329	5051	6281
4896	2381	5015	2633
0	0	57	0
1137	876	3304	2733
1034	248	959	367
1320	396	1408	1227
0	362	173	0
1159	344	742	412
386	225	359	488
1303	526	1641	711
1345	447	795	484
37	0	0	0
268	338	491	341
13312	3196	10071	6802
225	116	315	169
1121	655	1506	2055
0	0	0	0
0	0	0	0
233	176	338	51
54	0	0	0
0	0	0	0
573	174	1172	403
7502	2912	11167	9293
0	2	59	0
0	0	0	0
696	0	434	456
25189	13672	20796	16192
0	0	0	0
442	0	166	49
984	258	1031	596
94	50	128	65
2870	1821	6916	2106
2111	716	2477	3797
1038	824	1350	1942
696	0	434	456
240	0	152	0
967	304	1229	767
0	79	30	0
0	0	0	0
0	0	0	0
361	175	237	813
0	0	0	0
0	0	0	0
1306	190	2093	1297
3311	1647	3296	2780
3842	1089	5174	2705
0	0	31	70
0	0	0	0
530	0	493	218
0	0	0	0
0	19	87	84
0	0	0	0
769	257	978	589
202	15	429	215
0	0	0	0
614	183	1149	393
0	0	0	0
0	0	0	0
5825	1615	4524	2601
2233	1430	6684	1811
9522	3127	10645	7406
1332	579	576	1594
5776	1961	4235	3098
79	39	59	95
0	0	0	0
15625	6777	16561	6904
4858	1276	3976	2759
12	32	49	0
346	83	277	324
0	0	26	128
124	0	0	57
0	0	23	0
0	0	0	0
3005	749	2545	1885
237	39	154	11
0	0	0	0
783	278	1263	999
153	0	80	15
4291	1905	6458	3364
0	0	0	0
2614	1921	4743	3145
201	47	311	200
0	0	0	0
3911	990	3283	4126
548	118	159	232
0	0	0	0
1867	1063	1815	1173
1547	1468	2524	851
247	144	0	185
384	76	275	310
890	190	713	586
0	3	14	22
445	240	1587	1330
361	127	749	682
0	0	196	0
3003	94	1411	476
3379	968	1976	1870
8148	2014	6036	4253
1235	476	1873	1160
0	0	0	0
0	0	0	0
1849	353	2329	824
279	133	80	65
753	165	767	867
629	255	415	573
2327	389	1195	1496
0	0	0	0
0	0	0	0
0	0	0	0
0	92	567	235
0	0	0	0
41	0	38	0
4047	1300	5255	4825
0	0	35	0
53808	20795	65809	43517
2255	1065	1152	1271
0	117	44	128
5685	1798	7136	5159
188	109	59	55
347	0	162	0
0	0	0	0
318	0	99	0
2164	487	2248	1377
1759	687	3032	1647
312	73	235	160
0	0	0	0
0	0	0	0
1828	1078	1968	1694
47	27	13	2
154	457	575	151
5427	1901	5504	3207
0	0	0	0
8979	2348	8226	2887
0	0	0	0
0	0	0	0
3956	1585	5853	2956
6579	2479	5931	3067
0	12	41	4
446	43	402	116
486	358	425	237
4072	2841	8876	4920
3387	1072	2530	1290
1706	978	2717	2135
1319	645	1696	234
17310	10835	22472	13739
594	110	473	521
89	140	202	387
38	0	0	2
370	102	640	419
7259	2790	4754	4559
456	135	382	58
1713	821	1805	1445
843	453	833	643
0	0	0	0
24944	14145	37529	14012
0	0	0	0
81	56	194	61
11470	4785	13094	10796
22	0	182	189
21	22	196	0
0	0	0	0
1033	467	787	1748
0	0	0	0
775	206	783	0
388	69	562	566
762	0	380	229
2226	512	1727	1884
83	0	311	0
0	0	0	0
2732	913	2297	2864
1727	48	1183	0
130	0	0	13
5163	1026	6722	2610
3315	1536	1158	1311
0	0	0	0
13900	2750	19178	11837
1238	323	2178	2483
4063	2063	4507	2495
1546	925	1062	1281
1085	117	243	438
4681	1733	4757	3295
4681	1733	4757	3295
51258	21834	43753	18224
172	21	128	361
24849	13280	19830	15499
3662	587	2909	3014
0	0	15	0
77	127	573	184
2909	858	2962	2000
36443	11490	41305	30272
0	0	0	0
394	118	521	258
0	0	0	0
3334	1156	2073	3097
5596	2909	6053	1815
5047	1641	4422	3218
0	101	221	0
1085	367	1313	148
0	0	0	0
462	80	696	759
18117	4150	19698	23241
21	22	196	0
504	13	759	199
0	0	41	0
1068	361	786	1463
0	0	0	0
0	0	0	0
1652	1335	2458	1681
434	239	180	434
974	263	1632	980
47979	14580	57049	58217
16	13	243	20
0	0	0	0
1520	463	1915	587
365	0	374	1000
1526	786	2445	1215
0	0	0	0
767	463	722	1086
823	162	223	480
365	127	534	735
1463	854	646	352
0	97	189	81
0	0	0	0
0	0	0	0
1230	835	2348	1050
537	84	186	82
153	169	732	0
564	72	324	156
7	0	0	0
78	0	66	180
119	5	47	0
41	13	77	83
0	0	22	0
219	96	241	139
2577	1064	1913	2678
0	0	0	0
4995	2338	7589	5672
0	0	0	0
165	82	618	715
0	0	0	0
24	19	195	251
15	0	76	28
632	104	883	411
0	0	0	0
46708	20766	52200	33773
0	0	0	0
281	109	101	0
5371	1954	3273	2603
0	0	0	0
5289	1888	6090	3330
69	0	49	0
463	244	359	184
1092	163	2312	568
7115	2227	9953	8218
0	0	0	0
602	106	568	172
0	0	0	0
301	0	0	102
0	0	0	0
152	68	37	64
2681	2087	3862	3648
0	0	0	0
0	0	0	0
2602	2084	2986	2854
200	83	0	80
456	289	2000	1071
559	606	218	294
2291	1505	1994	1297
2311	999	1709	285
226	290	906	873
226	290	906	873
387	0	19	576
4061	931	5825	4436
904	143	96	231
8679	5967	8425	7624
0	0	0	0
0	298	300	108
0	0	0	0
257	106	0	444
0	62	0	30
1597	372	1746	1003
0	0	0	0
0	0	0	0
894	109	1009	152
14	36	0	224
5381	0	949	215
183	0	0	471
5845	1860	8005	3962
309	53	667	247
1727	48	1183	0
0	0	0	0
73	263	122	0
3052	1248	3254	2155
502	0	567	144
0	0	0	0
0	0	0	0
3202	1301	5233	2825
996	323	616	437
857	306	1212	779
0	0	0	0
1671	514	1249	526
154	64	513	130
74	0	92	0
0	0	0	0
38	9	79	51
448	302	434	696
12672	5018	11320	8958
0	234	0	0
22	18	0	163
67	98	83	98
7516	2555	16762	7013
1410	488	867	619
2611	1082	2325	1598
0	0	0	0
865	252	982	733
4631	1339	6730	4914
131	10	208	387
0	0	0	0
891	134	529	719
151	62	171	45
0	0	0	0
1342	92	1422	1611
0	0	0	0
246	85	179	517
0	0	0	0
0	0	0	0
145	0	0	243
0	0	0	0
225	124	213	194
0	0	0	0
37	114	159	320
322	67	317	138
7564	3272	9488	4690
0	0	0	0
0	0	0	0
288	13	113	474
2503	741	3855	1799
4992	2261	4745	3715
1550	936	3107	862
4232	1765	4421	6160
0	0	121	0
445	76	212	298
1940	1255	2744	2841
157	0	168	189
1046	186	607	0
1479	265	282	1618
1945	1222	3949	1066
0	0	0	0
0	0	0	0
1890	351	1752	1454
755	291	1212	887
0	0	0	0
0	0	0	0
0	0	0	0
3306	1479	2677	3363
642	530	545	771
44	0	32	0
0	0	0	0
0	0	0	0
0	0	75	0
117	0	0	0
1281	367	2125	1066
13986	4897	13083	8399
0	0	0	0
0	0	0	0
1393	264	687	871
0	0	0	0
502	0	567	144
0	0	98	0
315	0	294	95
25	0	25	9
627	198	213	125
0	0	0	0
217	10	330	290
17331	10907	22640	13812
40	0	295	248
0	0	0	0
604	12	461	316
1127	98	1772	617
543	17	200	145
0	0	0	0
42	41	52	0
309	98	410	143
1601	794	694	724
0	0	0	0
0	0	146	99
753	805	0	213
326	135	58	323
172	0	250	0
0	0	0	0
907	495	1561	579
108	13	144	111
867	662	556	300
0	0	0	0
307	81	790	76
0	0	0	0
82	0	8	8
78	0	0	0
0	0	9	33
845	217	581	717
601	446	1272	1154
38	37	206	9
86	305	911	203
873	273	1059	341
0	0	0	0
2864	774	3148	2205
1368	441	1863	1155
0	0	0	0
928	137	660	597
477	43	234	252
0	0	0	0
386	130	30	264
7	6	254	191
0	0	0	0
0	0	0	0
4393	1306	4050	3633
357	78	422	0
1498	170	924	1174
1653	575	578	446
0	0	0	0
0	0	0	0
47	52	54	0
1528	752	2262	333
0	0	0	0
10467	3127	13513	7477
11	82	137	79
72	20	0	187
14029	5520	17809	11174
0	0	0	0
460	467	1101	1061
0	0	0	0
0	0	0	0
1254	861	423	784
0	0	0	0
12	0	0	29
0	0	0	0
3003	94	1411	476
765	1464	1861	2363
9153	4289	10519	6147
0	0	0	0
0	0	0	0
192	50	284	605
310	72	582	215
222	100	460	107
0	0	0	0
915	29	845	1096
0	0	0	0
0	0	0	0
1737	97	1272	424
8501	2060	11245	11748
352	421	749	194
2197	430	2464	1000
79	0	82	79
0	0	0	0
173	118	60	98
0	0	0	0
0	0	0	0
92	0	0	74
0	0	0	0
1106	744	1785	2460
2308	1057	4666	1343
0	0	0	0
2075	1573	4534	1830
95	27	181	205
3358	2290	6652	5560
0	0	0	0
601	205	129	124
65	62	81	89
0	0	0	0
4182	2091	6253	3541
316	605	842	752
126	30	107	170
0	0	0	0
0	0	0	0
43	53	134	0
0	0	0	0
147	134	0	45
1139	503	1213	983
0	0	0	0
4678	2692	7768	6049
0	0	0	0
0	0	0	0
0	0	0	0
1305	599	2934	1175
18	0	92	0
0	0	23	0
0	60	30	0
0	60	30	0
18	348	344	187
387	0	178	620
285	59	177	288
403	285	799	96
246	29	306	211
3867	1571	9194	3104
1227	825	1405	588
280	262	364	146
0	0	0	0
0	0	0	0
52	0	0	0
182	300	543	306
211	86	677	0
56	0	0	0
9527	3304	10208	7864
0	0	0	0
0	0	0	0
1543	245	1766	966
594	343	330	256
1512	424	678	706
274	0	0	0
8849	4121	8302	5096
134	0	121	88
21942	8015	30063	22409
452	292	147	0
1245	473	1705	718
0	0	0	0
0	0	289	16
151	0	403	207
28	0	0	0
624	79	120	439
1939	1355	1852	1109
10658	2240	12557	7840
1555	504	4841	1534
0	0	0	0
1775	225	883	734
2228	1136	2503	914
13	0	0	0
38	99	94	18
0	0	0	0
26	0	47	0
3195	168	1522	645
105	36	80	271
49	0	0	215
6783	1751	7719	6998
3901	2543	7158	7807
875	0	0	680
424	96	264	162
0	0	0	0
0	0	0	0
0	11	0	0
152	0	0	0
1105	250	135	1124
63	0	0	0
0	0	0	0
0	0	0	0
424	96	264	162
15049	3762	17585	13522
59	0	147	0
0	0	0	0
113	0	125	0
0	0	0	6
318	0	99	0
7584	2892	9436	6821
449	0	0	58
4160	1271	5567	4574
0	0	0	0
1557	1409	2084	997
0	0	11	0
1040	238	734	432
0	0	0	0
0	0	0	0
215	453	244	0
12	0	0	0
1352	693	1462	965
0	0	0	0
684	183	501	338
135	111	140	0
19	335	238	194
1185	329	1113	255
146	45	159	304
0	0	0	0
0	0	0	0
151	0	0	42
0	0	0	0
0	0	0	0
337	83	965	121
2532	153	1780	204
0	0	0	0
258	83	36	80
1571	689	1454	854
513	0	142	274
27	0	84	0
0	0	0	0
7785	3115	10749	6803
0	0	0	0
277	57	0	272
0	0	0	0
611	244	682	582
777	83	650	654
186	0	763	192
0	0	0	0
0	0	0	0
0	0	0	0
850	215	460	0
201	0	83	241
8144	3994	8368	3840
18	15	316	523
0	0	0	0
0	0	0	0
1199	16	188	1054
2858	599	1325	1412
0	0	0	0
233	21	468	296
62	31	155	125
25	49	233	118
0	0	0	0
63	35	0	430
387	128	48	70
0	0	0	0
503	193	403	324
3463	2290	6816	5560
18483	6915	19901	15671
3000	811	3161	2082
0	79	0	0
23	462	464	447
0	0	0	0
25040	8464	32132	24424
0	0	0	0
0	0	174	0
77	0	48	108
0	0	0	0
0	0	0	0
145	120	362	75
35	0	0	83
0	0	0	0
261	27	437	0
1470	235	971	236
0	0	0	0
0	0	0	0
0	0	0	0
0	0	0	0
1788	446	2269	1224
0	0	0	0
310	91	225	263
0	0	0	0
0	0	0	0
117	10	58	0
8155	5769	7605	7204
100	111	0	67
0	0	0	0
0	0	0	0
2346	1292	3156	2673
56	15	115	122
0	0	0	0
0	0	0	0
0	0	0	0
39	9	178	149
0	0	0	0
626	202	1693	1109
0	98	0	0
96	0	24	257
27	45	125	11
0	0	0	0
28	23	70	56
0	0	0	0
0	0	0	0
153	252	428	220
436	0	167	363
372	144	898	656
2465	729	2209	1765
0	0	0	0
0	0	0	0
213	75	417	238
0	0	0	0
2084	521	1334	1464
0	0	0	0
0	0	0	0
0	0	0	0
0	0	0	0
0	0	0	0
0	0	0	0
0	0	0	0
0	0	0	0
0	0	0	0
0	0	0	0
54	0	0	0
39	0	49	0
7	0	9	104
0	0	0	0
0	0	0	0
0	0	0	0
0	0	0	0
0	0	0	0
0	0	0	0
740	0	163	314
0	0	0	0
0	0	0	0
61	0	0	0
4841	2423	4699	1859
0	0	0	0
0	45	0	22
0	0	0	0
0	0	0	0
1658	487	1331	398
0	0	0	0
782	438	418	772
0	0	0	0
480	0	211	0
0	0	0	0
0	20	274	59
0	0	0	0
6978	916	5700	4016
457	149	311	433
5875	1540	5155	1380
31	0	0	0
138	0	191	0
0	0	0	0
1266	311	738	679
0	0	0	0
0	0	0	0
2012	527	2066	1120
623	525	1009	748
473	109	613	364
1019	421	1125	668
203	302	338	277
0	0	0	0
0	0	0	0
0	0	0	0
0	0	0	0
0	0	0	0
977	0	435	114
0	0	0	0
27	0	137	0
126	0	165	34
2962	1758	3991	3190
4731	3001	3261	1454
0	0	0	0
2855	350	1808	2042
0	0	0	0
0	0	0	0
0	0	0	0
0	0	0	0
0	0	0	0
1058	618	610	465
9811	2908	13257	9320
0	188	106	127
0	0	0	0
12224	4253	13324	10826
703	487	212	490
0	0	0	0
0	0	0	0
0	0	220	0
10512	3510	10303	6261
164	0	93	0
11420	2474	7970	5281
0	0	0	0
6807	1639	8731	7221
1273	406	1854	580
5381	0	949	215
0	0	0	0
65	34	0	88
0	0	0	0
0	0	0	0
0	0	0	0
0	0	0	0
0	0	104	0
1189	263	1615	1047
1271	480	833	760
0	0	0	0
83	99	375	217
131	0	446	106
86	57	150	0
785	355	536	1034
295	329	257	514
30	0	0	0
499	198	418	222
0	286	0	594
0	0	0	0
81	133	126	0
0	0	0	0
291	120	363	1618
605	260	1807	871
37	31	557	89
1546	925	1062	1281
0	0	0	0
0	0	0	0
0	0	0	0
61	63	57	0
991	682	370	317
73	263	122	0
0	0	0	0
372	0	707	511
2739	797	2782	2743
45	0	56	134
118	0	0	0
0	0	0	0
0	0	0	0
689	142	1381	931
0	0	0	0
70	0	29	195
0	0	0	0
0	0	0	0
576	142	795	103
2117	514	2687	1445
0	0	0	0
241	206	448	0
0	0	0	0
587	0	0	0
0	0	0	0
156	0	451	0
62526	23163	75853	50577
530	73	124	279
50	82	0	30
461	233	223	215
0	0	0	0
0	0	0	0
0	0	0	0
2937	878	2223	1003
75	0	93	0
172	0	369	23
136	0	94	0
142	85	0	139
407	359	930	151
82	202	102	0
2056	369	3785	1932
0	0	0	0
571	202	643	946
0	0	0	0
0	0	0	0
651	194	541	196
2044	844	255	573
4449	2574	5373	3734
15601	7751	17954	10984
72	95	180	87
0	0	0	0
0	0	0	0
0	0	0	0
0	0	0	0
0	0	0	0
0	0	0	0
1093	722	2177	1050
0	0	0	0
127	46	23	133
96	108	193	72
0	0	181	58
0	0	0	0
9	0	22	0
33	0	130	0
0	0	0	0
12946	4413	12276	7718
0	0	0	0
177	0	111	467
9655	4358	8375	3950
0	0	0	0
396	367	862	594
67	0	67	0
0	0	0	0
509	152	546	833
32	16	25	0
342	20	547	939
0	12	61	175
0	0	0	0
0	0	0	0
378	459	111	213
1093	722	2177	1050
0	0	0	0
0	0	0	0
364	50	756	36
1595	0	625	948
0	0	0	0
0	0	0	0
0	0	0	0
0	0	0	0
417	44	240	295
293	29	87	295
0	0	0	0
0	0	0	0
1335	450	1358	877
0	0	0	0
0	0	107	0
0	0	0	0
0	0	0	90
0	0	0	0
0	0	0	0
1148	837	1900	1167
0	0	0	0
0	0	0	0
0	0	0	0
294	0	0	59
0	0	0	0
1698	787	482	1109
0	0	0	0
0	0	0	0
401	116	225	482
59	0	0	0
138	38	0	14
0	0	0	0
0	0	0	0
0	0	0	0
0	0	0	0
136	0	186	213
1255	0	1406	0
925	489	797	626
47	169	313	358
74	0	0	0
0	0	0	0
0	0	0	0
2361	1281	2210	1275
2287	675	3001	1962
316	56	337	27
0	0	0	0
2087	39	1844	1645
40	259	693	860
1788	446	2269	1224
25	0	0	0
96	37	16	0
1145	93	1482	0
0	0	0	0
811	75	113	116
0	0	0	0
24	0	0	875
603	234	1024	1334
0	0	0	0
0	0	0	0
0	0	0	0
0	0	0	0
3003	94	1411	476
0	0	0	0
0	0	0	0
0	0	0	0
274	104	655	121
27	45	125	11
337	83	965	121
1234	728	860	229
5047	1641	4422	3218
5047	1641	4422	3218
11201	5365	13201	10083
4291	1905	6458	3364
4291	1905	6458	3364
783	278	1263	999
783	278	1263	999
1064	330	1228	1039
23868	9144	29906	22437
8350	3693	7215	3731
29210	14032	25671	12297
8486	2859	5259	7657
8486	2859	5259	7657
8148	2014	6036	4253
530	0	493	218
972	445	422	978
4896	2381	5015	2633
9650	3017	9408	5730
4754	636	4393	3097
0	0	0	0
486	547	645	723
4301	897	5234	3864
400	231	1046	480
7516	2555	16762	7013
6773	1903	7036	4274
13312	5944	16280	9318
1236	981	1983	389
1214	571	1048	941
12103	6239	8912	6347
5825	1615	4524	2601
0	0	0	0
0	0	0	0
32742	11113	39853	28994
32742	11113	39853	28994
20141	4659	21616	24615
1342	92	1422	1611
1342	92	1422	1611
24225	13547	28526	16499
19670	5710	15946	3873
47	52	54	0
29058	10478	28876	23550
1331	864	533	1427
0	0	0	0
404	77	468	56
452	292	147	0
29806	7664	24258	18729
2184	1057	2213	724
4858	1276	3976	2759
4858	1276	3976	2759
4858	1276	3976	2759
2614	1921	4743	3145
1520	463	1915	587
1815	283	768	1577
0	0	0	0
203	335	829	70
627	243	512	94
9522	3127	10645	7406
0	0	0	0
848	607	1060	756
753	805	0	213
0	0	0	0
582	121	610	245
7115	2227	9953	8218
154	429	575	69
352	421	749	194
0	0	0	0
21340	6980	19163	14121
998	857	1493	1007
642	530	545	771
0	0	0	0
28775	8052	33478	24333
0	0	0	0
2489	926	3536	3115
526	0	0	381
3805	891	3690	1906
0	0	0	0
307	283	22	433
0	0	0	0
0	0	0	0
2023	1779	4221	2619
144	0	12	219
63	0	0	0
122	75	398	128
0	0	0	0
4558	1521	3956	4147
0	0	0	0
69	0	171	0
178	154	204	1049
1197	394	2186	1181
1337	598	1064	535
2961	1675	4677	1731
267	147	0	0
0	480	282	427
2913	1215	2335	2424
0	0	0	0
0	0	0	0
385	0	203	130
0	0	0	0
0	0	0	0
872	491	1832	284
502	0	567	144
318	0	99	0
318	0	99	0
0	0	0	0
6908	2547	4657	3525
10032	1725	9885	9761
23932	4475	29063	21598
6855	1537	5488	1705
385	0	309	165
0	0	0	0
683	282	671	394
593	392	2166	380
0	0	0	0
0	0	0	0
0	0	0	0
0	0	0	0
65	22	212	0
0	0	0	0
0	0	0	0
23	462	464	447
0	0	0	0
0	0	0	0
0	0	0	0
0	0	59	0
0	0	0	0
183	0	137	53
0	0	0	22
0	0	0	0
0	0	0	0
3837	2519	3251	3189
3145	1903	3019	2421
0	0	0	0
129	330	776	204
0	0	0	0
0	0	0	0
0	0	0	0
1184	455	1515	1322
1540	280	1657	1661
0	0	0	0
0	0	0	0
53	0	0	0
3269	2022	2933	2171
0	0	0	0
0	0	0	0
0	0	0	0
0	0	0	0
0	0	0	0
0	0	0	0
200	62	0	30
0	0	0	0
0	0	0	0
0	0	0	0
0	165	0	0
0	0	0	0
488	176	915	564
0	0	0	0
0	0	0	0
0	0	0	0
5776	1961	4235	3098
1068	361	786	1463
186	0	763	192
477	43	234	252
0	0	0	0
0	0	0	0
0	0	0	0
0	0	0	0
700	242	665	92
0	0	0	0
0	0	0	0
2044	844	255	573
445	240	1587	1330
533	76	412	265
2228	1245	2526	1005
0	0	0	0
143	0	0	0
0	0	0	0
0	0	0	0
0	0	0	0
7040	1537	5636	1737
6855	1537	5488	1705
434	239	180	434
0	0	0	0
12662	3565	16367	8711
0	0	0	0
0	0	0	0
0	0	0	81
194	0	451	124
6052	2672	6951	11020
0	0	0	0
0	0	0	0
0	0	41	0
0	0	0	0
52	51	154	0
0	0	0	0
0	0	0	0
0	0	0	0
0	0	0	0
0	0	0	0
2313	1353	1951	1312
883	469	512	1227
2020	1193	2107	532
0	0	0	0
0	0	0	0
0	0	0	0
1336	1287	2738	2072
0	0	0	0
0	0	0	0
0	0	0	0
0	0	0	0
26447	8559	23547	21424
0	0	0	0
286	283	572	91
0	0	0	0
0	0	0	0
0	0	0	0
185	88	410	132
0	0	0	0
0	0	0	0
8	48	0	158
0	0	0	0
240	0	0	397
0	0	0	0
0	0	0	0
0	0	0	0
0	0	0	0
0	0	0	0
0	0	0	0
286	0	0	94
0	0	0	0
597	214	1247	1058
442	0	166	49
183	0	0	471
183	0	0	471
1618	610	2034	1188
1945	1222	3949	1066
1945	1222	3949	1066
0	79	30	0
718	268	879	185
0	0	0	53
276	127	0	442
0	0	0	0
1165	220	949	686
1118	479	881	731
0	78	29	291
0	0	0	0
366	0	174	565
11823	2194	16505	9887
0	0	118	0
0	0	0	0
0	0	0	0
0	0	0	0
0	0	0	0
151	63	210	315
976	403	1128	354
0	0	0	0
35	0	0	0
81	96	1504	826
767	463	722	1086
0	0	0	0
0	0	0	0
231	0	72	208
482	89	595	370
65	0	0	176
0	0	0	0
6410	0	3801	0
0	0	0	0
346	80	531	188
0	0	0	0
0	0	0	0
0	0	0	0
293	111	550	133
0	0	0	0
0	0	0	0
0	0	0	0
601	446	1272	1154
0	0	0	0
0	0	0	0
0	0	0	0
583	66	604	1223
184	51	0	0
0	0	0	0
0	0	0	0
0	0	0	0
0	0	0	0
15	148	74	90
399	17	402	392
386	225	359	488
1333	473	2113	920
386	130	30	264
2233	1430	6684	1811
1224	511	603	747
149	0	297	466
12111	5999	11195	7545
0	0	25	145
21	0	113	0
14	0	0	0
264	15	0	0
2223	600	2316	1488
0	0	0	0
2055	929	2616	737
61	44	295	37
2211	1278	2982	3186
0	34	103	33
628	440	1577	904
0	0	0	0
520	261	578	45
0	0	0	0
0	0	0	0
0	286	0	594
977	381	708	396
0	0	0	0
0	0	0	0
0	0	0	0
290	0	119	0
5834	3669	7942	4752
878	59	1294	688
0	0	0	0
0	0	0	0
0	0	0	0
0	0	0	0
0	0	0	0
9	0	99	0
0	0	0	0
17	69	125	0
539	89	235	356
0	0	0	0
324	306	490	278
69	0	171	0
605	260	1807	871
0	0	0	0
49	0	37	0
0	0	0	0
1478	1059	541	1383
0	0	0	0
3220	2723	3468	1249
0	0	0	0
0	0	0	0
0	44	0	0
0	0	0	0
0	0	0	0
0	0	0	0
36	0	0	0
29	205	272	70
0	0	0	0
23	0	43	42
822	264	889	108
0	0	0	0
0	0	0	0
0	15	116	67
0	0	0	0
94	0	0	0
0	0	29	112
0	0	0	0
0	0	0	0
0	0	0	0
109	0	157	71
0	0	0	0
0	0	0	0
0	0	0	0
0	0	0	30
0	0	0	0
0	0	0	0
925	160	147	231
0	0	0	0
0	0	0	0
1155	98	885	107
0	0	0	0
0	0	0	0
1246	1098	1514	567
0	0	0	0
0	9	0	51
19	0	166	0
0	0	0	0
2375	222	1212	560
67	83	159	142
0	0	0	0
0	0	0	249
0	0	0	0
0	0	0	0
0	0	0	0
201	157	241	9
0	0	0	0
68	0	84	49
17142	6448	17435	6898
4586	1482	3559	2607
0	0	0	0
0	59	0	17
223	50	350	98
263	35	275	126
0	0	0	0
248	223	52	444
0	0	0	0
0	0	0	0
0	0	0	0
0	140	212	263
0	0	0	0
0	0	0	0
0	0	0	0
0	0	0	0
0	0	0	0
0	0	0	0
0	0	0	0
209	276	121	184
0	0	0	0
0	0	0	0
0	0	0	0
0	0	0	0
0	0	0	0
603	569	1145	1414
0	0	0	0
0	0	0	0
0	0	0	0
80	7	0	163
0	0	0	0
0	0	0	0
0	0	0	0
1115	739	478	900
5122	2223	10723	5037
15797	7930	24490	12320
5122	2223	10723	5037
2477	722	2812	1356
1121	655	1506	2055
0	0	0	0
8979	2348	8226	2887
8979	2348	8226	2887
8979	2348	8226	2887
8979	2348	8226	2887
0	0	0	0
0	0	0	0
0	0	0	0
7875	4774	6942	4401
294	102	307	262
438	17	736	298
455	290	809	1401
0	0	0	0
0	0	0	0
0	0	0	0
966	0	570	610
0	0	0	0
0	0	0	0
0	0	0	0
10552	5921	12955	9154
3219	941	3915	3153
0	0	0	0
0	0	0	0
3669	322	2471	900
0	0	0	0
0	0	0	0
0	0	0	0
0	0	0	0
0	0	0	0
62	13	67	102
0	0	0	0
0	0	0	0
0	0	0	0
0	0	0	0
0	0	0	0
300	314	939	601
0	0	0	0
1054	795	1250	570
1121	655	1506	2055
0	0	0	0
0	0	0	0
0	0	0	0
6	0	0	0
11470	4785	13094	10796
0	0	0	0
0	0	0	0
103	0	85	120
0	0	0	0
0	0	0	0
11470	4785	13094	10796
11470	4785	13094	10796
11470	4785	13094	10796
0	0	0	0
0	0	0	0
0	0	0	0
0	0	0	0
0	0	0	0
884	438	1384	1487
0	0	0	0
33	94	0	0
0	0	0	0
0	0	0	0
0	0	0	0
15343	8264	11563	6385
1296	512	3385	2534
0	0	0	0
0	0	0	0
0	0	0	0
0	0	0	0
0	0	0	0
0	0	0	0
0	0	0	0
0	0	0	0
0	0	0	0
0	0	0	0
0	0	0	0
624	140	120	596
0	0	0	0
149	47	150	131
0	0	0	0
0	0	0	0
7925	1988	7683	6807
288	13	113	474
0	12	186	0
875	0	0	680
875	0	0	680
0	0	0	0
1331	60	265	1317
5163	1026	6722	2610
0	0	0	0
3684	969	2719	2458
394	118	521	258
0	0	0	0
2732	913	2297	2864
0	0	0	0
0	0	0	0
0	0	0	0
0	0	0	0
0	0	0	0
11	0	35	27
1245	275	931	1098
47	0	0	9
0	0	0	0
0	0	0	0
2012	527	2066	1120
0	0	0	0
28	0	0	0
558	166	0	80
0	0	0	0
0	34	259	133
0	0	0	0
30	0	25	0
0	0	0	0
264	85	128	325
264	85	128	325
0	0	0	0
0	0	0	0
0	0	0	0
0	0	0	0
0	0	0	0
0	0	0	0
543	433	428	111
413	0	1290	780
233	70	185	0
0	0	0	0
0	0	0	0
0	0	0	0
1951	0	0	1623
0	0	0	0
0	31	33	63
0	0	0	0
0	0	0	0
1106	744	1785	2460
77	0	132	46
0	0	0	0
0	0	0	0
1933	1021	2513	1032
1933	1021	2513	1032
0	0	0	0
0	0	0	0
0	0	0	0
0	0	0	0
373	0	411	0
592	200	470	356
0	0	0	0
0	0	0	0
0	0	0	0
0	0	0	0
0	0	0	0
0	0	0	0
0	0	0	0
0	0	0	0
0	0	0	0
434	239	180	434
0	0	0	0
0	0	0	0
0	0	0	0
0	0	0	0
0	0	0	0
0	0	0	0
0	0	0	0
0	0	0	0
1480	753	1068	695
0	0	0	0
0	0	0	0
0	0	0	0
300	0	509	163
0	0	0	0
40	259	693	860
55	0	0	0
0	0	0	0
0	0	0	0
0	0	0	0
0	0	0	0
0	0	0	0
0	0	0	27
0	0	0	0
0	0	0	0
0	0	0	0
0	0	0	0
131	199	519	684
0	0	0	0
0	0	0	0
0	0	0	0
0	0	0	0
0	0	0	0
0	0	0	0
0	0	0	0
0	0	0	0
0	0	0	0
0	0	0	0
0	0	0	0
324	0	78	60
0	0	0	0
20	67	378	438
0	0	0	0
0	0	0	0
0	0	0	0
0	0	0	0
0	0	0	0
0	0	0	0
0	0	0	0
0	0	0	0
0	0	0	0
0	0	0	0
0	0	0	0
2850	254	3837	680
0	0	0	0
0	0	0	0
252	0	52	0
471	61	617	893
275	0	340	243
0	0	0	0
86	0	108	17
0	0	0	0
0	0	0	0
0	0	23	0
0	0	0	0
0	0	0	0
0	0	0	0
0	134	0	0
0	0	0	0
0	0	0	0
0	0	0	0
752	99	525	0
0	0	0	0
1204	497	1764	850
2689	722	4292	2984
102	28	127	0
0	0	0	0
0	0	0	0
0	0	0	0
0	0	0	0
2075	1573	4534	1830
0	0	0	0
0	0	0	0
0	0	0	0
0	0	0	0
0	0	0	0
215	453	244	0
336	190	287	201
0	0	0	0
0	0	0	0
0	0	0	0
0	0	0	0
0	0	0	0
0	0	0	0
1483	61	431	327
0	0	0	0
0	0	29	0
447	469	556	1097
0	0	0	0
0	0	0	0
0	0	0	0
105	0	164	0
0	0	0	0
0	0	0	0
0	0	0	0
0	0	0	0
0	0	0	0
0	0	0	0
0	0	0	0
0	0	0	0
4662	3479	6003	1203
0	0	0	0
755	291	1212	887
331	390	118	681
171	0	0	44
0	0	0	0
0	0	0	0
0	0	0	0
0	0	0	0
0	0	0	0
119	164	49	95
0	55	100	0
0	0	0	0
0	0	0	0
0	0	0	0
0	0	0	0
0	0	0	0
43	27	15	0
0	0	0	0
0	0	0	0
0	0	0	0
0	0	0	0
0	0	0	0
0	0	0	0
0	0	0	0
39	0	481	0
0	0	0	0
1190	47	1268	623
272	63	50	30
0	0	0	0
181	21	257	46
0	0	0	0
0	0	0	0
0	47	159	0
0	0	0	0
348	57	462	362
0	0	0	0
73	0	0	0
0	0	0	0
0	0	0	0
0	0	0	0
0	0	0	0
0	0	0	192
0	0	0	0
0	0	0	0
0	0	0	0
0	0	0	0
2312	1517	4864	2028
0	0	0	0
0	0	0	0
0	0	0	0
0	0	0	0
0	0	0	0
0	0	0	0
117	0	146	88
0	0	0	0
1168	243	402	508
0	0	0	0
0	0	0	0
0	0	0	0
0	0	0	0
0	0	0	0
0	0	0	0
0	0	0	0
2771	1539	2986	1277
977	271	707	608
0	0	0	0
0	0	0	0
0	0	0	0
0	0	0	0
0	0	0	0
0	0	0	0
830	55	2383	1091
0	0	0	0
0	0	0	0
387	128	48	70
1127	98	1772	617
0	0	0	0
0	0	0	0
44298	15517	49696	37209
43051	15453	48296	37209
1297	443	2178	1128
1297	443	2178	1128
72	20	0	187
0	0	0	0
0	0	0	0
0	0	0	0
0	0	0	0
0	0	0	0
7516	2555	16762	7013
7516	2555	16762	7013
0	0	0	0
0	0	0	0
0	0	0	0
0	0	0	0
0	0	0	0
0	0	0	0
6807	1639	8731	7221
0	0	0	0
2024	509	1918	1374
0	0	0	0
0	0	0	0
0	0	0	0
0	0	0	0
590	17	173	244
0	0	0	0
0	0	0	0
999	41	713	313
0	0	0	0
0	0	0	0
356	156	396	138
0	0	0	0
139	0	94	21
59731	15017	67055	57231
0	0	0	0
0	0	0	0
0	286	0	594
0	0	0	0
24	286	0	623
5599	2587	4922	9163
0	0	0	0
219	15	11	0
0	0	0	0
0	0	0	0
9527	3304	10208	7864
7187	2914	8001	7230
0	0	0	0
172	0	0	0
865	0	462	247
865	0	462	247
0	0	0	0
15251	4167	13686	11447
174701	58475	208804	140074
525	241	581	0
0	0	0	0
21153	5771	16377	4200
332	242	532	232
35	0	0	83
1194	579	576	1309
0	0	0	0
6663	1838	6977	4274
0	0	0	0
0	90	0	0
0	0	0	0
0	0	0	0
0	0	0	0
0	0	0	0
0	0	0	0
0	0	0	0
0	0	0	0
0	0	0	0
0	0	0	0
0	0	0	0
0	0	0	0
0	0	0	0
0	0	0	0
0	0	0	0
0	0	0	0
154	142	44	50
526	0	0	381
526	0	0	381
199	40	473	269
0	0	0	0
0	0	0	0
0	0	0	0
0	0	0	0
0	0	0	0
0	0	0	0
55	0	206	133
0	0	0	0
1347	0	1680	651
0	0	0	0
0	0	0	0
0	0	0	0
20	0	0	49
1588	609	1272	2452
0	0	0	0
0	0	0	0
2604	396	3519	2393
6425	1895	4434	2946
1184	455	1515	1322
43685	13845	47774	35640
601	205	129	124
35148	17525	38699	22036
0	0	0	0
4160	1271	5567	4574
0	0	0	0
0	0	0	0
0	0	0	0
775	103	770	369
0	0	0	0
914	252	843	0
0	0	0	0
152	0	0	0
236	122	147	0
927	67	1356	452
172	0	250	0
900	850	1709	1905
157	0	168	189
5558	2887	5037	2632
0	0	0	0
0	0	0	0
0	0	0	0
0	0	0	0
1417	745	855	876
132	0	0	0
63	0	0	508
411	223	123	325
1125	330	2080	1003
5880	2510	4126	4003
8682	3798	14476	13176
0	0	0	0
1170	0	104	1054
0	0	0	0
0	0	0	0
10675	5707	13796	7283
3127	1961	5388	1865
0	0	0	0
225	116	315	169
0	0	0	0
0	0	0	0
0	0	0	0
0	0	0	0
700	165	954	720
1097	287	1133	707
0	76	297	132
5558	2887	5037	2632
366	0	174	565
0	0	0	0
0	0	0	0
0	0	0	0
0	0	0	0
0	0	0	0
0	0	0	0
0	0	0	0
0	0	0	0
0	0	0	0
0	46	0	365
925	489	797	626
0	0	0	0
674	649	867	863
0	0	0	0
4851	1996	8359	2961
95	0	177	0
0	0	0	0
0	0	0	0
182	300	543	306
1775	222	1139	0
0	0	0	0
0	0	0	0
0	0	0	0
0	0	0	0
0	0	232	0
370	92	1059	0
429	318	627	391
947	203	1815	865
0	0	0	0
2159	700	1831	1459
1764	577	3258	1280
0	0	0	0
1860	0	0	1514
0	0	0	0
0	0	0	0
2161	1769	3671	1952
846	215	1320	937
931	264	492	518
4468	1329	5051	6281
846	215	1320	937
651	194	541	196
0	0	0	0
0	0	0	0
[truncated: 1,185 more rows]

## Sheet: BACCAC_29days
17293	11364	13999	15876
12525	10767	9627	14050
22867	18635	18157	21111
0	0	0	0
9154	9423	6253	9999
4924	5912	4787	3466
131	0	0	47
631	566	457	660
105	312	99	220
50	405	165	179
795	982	284	1000
0	0	0	0
2670	1787	2468	3378
14037	12060	18078	17049
0	0	0	0
57214	45815	40876	51771
222	154	120	28
1392	867	744	929
313	324	0	179
0	0	0	0
0	0	0	0
56343	38985	42292	26561
268	251	228	927
0	85	0	219
2152	1280	1757	1472
0	0	0	0
885	1491	344	1531
469	314	1799	1920
1165	1122	1022	852
268	174	127	48
4623	6992	3709	10795
964	1046	517	1644
713	886	1973	1795
6251	5321	7344	5941
4826	3635	2445	5122
5747	7095	4739	8012
1437	1020	1379	949
1535	3229	2085	3222
1319	341	362	348
26595	20499	36275	21942
280	265	177	754
2656	2415	1057	3347
1877	978	1735	1531
12041	12103	6907	9658
0	0	0	0
954	573	668	872
8351	6441	7758	10361
988	2220	792	1842
0	0	0	0
54	66	0	97
0	0	0	0
3194	3430	2464	2761
0	0	0	0
9402	8722	7359	13637
1050	402	1357	1030
14356	13568	7346	12134
616	790	90	362
3550	5089	4104	5888
338	34	0	304
4228	3705	3872	5222
541	528	572	838
651	694	536	664
0	0	0	0
0	0	0	0
4515	8104	9783	9512
4147	3676	2507	4569
718	0	68	129
359	291	181	548
3813	4442	3915	2739
2557	1769	1415	2716
1219	2061	1336	2494
1310	1825	408	1153
307	541	543	539
0	0	0	0
0	0	0	0
181	411	120	314
767	545	681	861
0	0	0	0
2388	1790	2854	1947
40	9	115	12
9967	8647	4625	7240
4265	2556	2528	4168
4472	4695	3802	5219
33536	26403	20497	34371
11113	11657	8522	17228
1002	589	818	1489
2341	1789	1760	2294
733	332	841	860
228	303	315	112
1124	1902	2118	1227
0	0	0	0
0	0	0	0
331	865	174	528
5262	5914	4010	4965
1437	1701	1005	1796
948	332	1304	1218
0	0	0	0
754	206	360	258
218	47	165	438
0	0	0	0
741	774	936	1458
0	0	0	0
281	496	402	589
2257	2169	1352	3438
1095	411	558	811
336	152	71	59
3194	3167	2847	2528
27	44	0	0
970	431	580	1172
30	73	100	149
2679	3021	1243	4179
0	0	0	0
0	0	0	0
11364	11270	11216	17216
23913	19900	18666	27866
2239	1441	1106	1371
55	0	0	37
1440	1801	138	1892
207	23	272	117
3156	3147	999	2547
7623	7216	7408	10674
5976	7575	4561	5003
2553	2784	2273	4161
97	47	55	157
3534	4524	1862	4478
1267	1110	458	1316
1080	1709	696	1449
1202	1071	232	485
741	1003	603	1381
1015	681	342	1078
545	549	872	51
2763	1288	983	888
94	25	89	14
440	536	530	395
6887	5574	6344	6332
605	1569	583	799
1546	1905	1053	1687
689	7174	869	928
0	0	0	0
1154	486	534	509
0	0	0	0
0	0	0	0
1426	364	708	942
12583	12188	10510	15796
20	50	58	179
0	0	0	0
602	1304	418	829
24478	15683	17212	15499
0	0	0	0
218	325	49	362
1105	918	1337	985
237	137	7	340
3506	2682	1149	4904
3636	2447	1532	3254
1764	1160	1273	2381
602	1304	418	829
136	105	190	46
1350	1913	2533	2359
61	173	231	137
0	0	0	0
0	0	0	0
268	262	585	434
0	0	0	0
0	0	0	0
896	3340	1340	2076
2871	3585	2454	5860
7056	7098	6772	9376
0	0	77	0
0	0	0	0
2157	1290	856	1323
0	0	0	0
624	337	0	560
0	0	0	0
457	708	491	1081
113	594	392	629
0	0	0	0
1345	1251	246	1504
0	0	0	0
0	0	0	0
4641	3768	3294	3757
11838	11571	8895	15510
9863	9628	5063	16525
2233	838	2242	957
5483	3140	2888	2772
141	252	0	163
0	0	0	0
14589	9853	11442	8901
4924	6146	4935	7871
69	56	94	18
202	517	44	958
81	287	0	0
19	21	0	0
0	44	0	0
284	0	269	96
1194	1332	2971	1714
217	430	639	487
0	0	0	0
668	870	956	1038
427	313	15	116
5895	4226	3178	5893
0	0	0	0
5637	4524	5287	4062
830	778	358	610
0	0	0	0
2331	5677	3791	6417
653	381	675	476
0	0	0	0
3624	4367	2182	2556
2665	3216	1122	3255
478	548	56	610
972	531	684	1007
4117	1904	3215	2211
0	23	27	63
827	1054	970	821
1777	809	1541	1039
57	370	0	205
2301	1634	2111	2195
1920	2051	918	2725
2377	2021	3251	2771
2769	3073	1420	2836
0	0	0	0
0	0	0	0
4267	2893	2911	3654
532	365	374	429
1834	2234	719	1987
1107	631	1701	1563
2765	2627	4964	2370
0	0	0	0
0	0	0	0
0	0	0	0
148	258	168	70
0	43	0	48
90	10	110	0
7356	8543	6972	8888
0	36	42	0
59554	43670	44136	52022
2001	1363	1196	2400
68	37	0	0
7010	4951	4112	9393
0	344	18	57
110	0	26	173
0	0	0	0
1312	369	0	634
2252	2278	2138	3609
2645	2691	2318	3481
768	309	196	790
0	0	0	0
0	0	0	0
2196	1352	670	1607
25	3	179	106
612	395	185	436
7650	5008	6105	7486
0	0	0	0
9699	12933	4820	15880
0	0	0	0
0	0	0	0
5927	3650	4074	8734
4896	3994	3733	5642
14	22	0	0
355	295	15	368
400	1123	1199	599
10648	10516	7069	9083
2932	2972	2225	3486
3080	2995	2399	3168
1416	1416	1757	1965
23238	7355	13421	13433
582	1043	241	1865
0	462	404	450
3	34	54	7
808	762	518	655
10066	10895	6812	9751
290	257	0	161
2006	1983	2738	2388
373	399	583	632
0	0	0	45
23552	26641	11340	23136
0	0	0	0
729	270	423	637
17330	15813	9418	24649
100	116	67	192
209	166	417	284
0	0	0	0
3128	731	1130	1561
0	0	0	0
719	436	498	554
702	704	838	705
387	1334	961	477
2037	751	1052	1164
0	0	0	0
0	0	0	0
4342	2936	1800	4226
511	178	2006	623
207	23	272	117
9869	5501	5876	7317
1641	1790	874	829
15	0	7	150
21136	19746	13356	29100
3242	2981	1692	6345
3851	3703	2076	2740
2774	1757	128	2126
1009	1345	388	1301
2526	3103	3296	2636
2526	3103	3296	2636
35980	31163	30401	34710
338	248	62	167
23629	14884	16613	14385
4511	4452	2245	4645
0	0	0	0
924	474	438	459
7724	6449	5621	8013
111496	110223	66435	121212
0	0	0	0
106	197	316	503
0	0	0	0
4313	4302	3717	3986
1838	1978	1763	1906
10356	6244	8363	5954
335	160	292	67
966	769	1057	1093
0	0	0	0
648	826	788	665
37285	32217	22357	40421
209	166	417	284
428	656	386	404
210	1331	80	0
1109	1250	700	1604
0	0	0	0
0	0	0	0
3970	2760	3308	4468
1238	1637	304	2264
1797	1392	657	2397
82793	73378	56117	83345
268	268	254	204
0	0	0	0
2211	2609	2211	2298
1261	1372	1644	1903
2345	1774	1150	1714
0	0	0	0
1242	1361	1214	1087
1285	875	676	1232
348	478	261	397
1623	853	772	888
85	52	40	249
0	0	0	0
0	0	0	0
1328	1572	1807	1974
780	610	427	348
357	342	553	466
660	1339	807	1037
41	67	55	52
59	133	390	372
103	43	60	157
169	78	154	32
0	5	9	4
376	252	201	279
2201	1623	1131	3800
0	0	0	0
8504	7636	7644	8639
0	0	0	0
2602	1737	1391	2638
0	0	0	0
580	536	157	494
40	0	0	48
495	1057	1209	943
0	0	0	0
51417	46766	33841	62801
0	0	0	0
128	93	0	207
2855	3217	3421	3607
0	0	0	0
8060	7840	6442	9647
16	30	47	45
340	625	382	1238
1833	1471	994	2537
13853	12900	10782	16007
0	0	0	0
162	593	283	541
0	0	0	0
397	105	273	210
0	0	77	0
220	54	185	77
6962	6581	2658	5369
28	0	0	12
9	5	0	0
3681	4238	1333	4029
0	172	0	0
1222	1672	131	1744
2039	2410	462	3821
915	1274	1126	845
1294	1820	2276	1808
732	542	572	1229
732	542	572	1229
118	207	130	335
5654	3790	4542	5711
756	1247	1109	1402
7826	11493	6868	9093
0	0	0	0
38	248	0	69
0	0	0	0
143	116	135	55
0	52	0	172
2976	1770	1384	3263
0	0	0	0
0	0	0	0
964	1046	517	1644
382	88	69	315
1252	970	8459	1431
166	0	157	343
9967	8647	4625	7240
490	1400	726	1180
511	178	2006	623
0	0	0	0
280	202	0	0
3100	2069	2817	5537
1025	473	843	604
0	0	0	0
0	0	0	0
3802	3814	3617	4285
2615	942	2186	1682
1264	1575	1420	2059
0	0	0	0
643	783	1135	853
352	63	56	386
397	189	265	585
384	208	0	46
94	70	0	39
1330	969	668	1411
9712	11531	5716	11509
23	73	0	323
202	0	0	180
545	500	245	558
10138	7672	6556	9277
1803	1377	1444	1430
1972	1412	1134	3695
0	0	0	0
1065	1993	1834	2588
8033	11706	7702	11735
361	359	0	271
0	0	0	0
1618	1251	486	2476
32	146	0	43
0	0	0	0
1471	2467	949	2440
0	0	0	0
494	506	0	490
0	0	0	0
0	0	0	0
73	203	0	0
50	68	0	0
199	367	312	296
0	0	0	0
320	75	0	62
354	714	331	367
6006	4103	8137	6541
0	0	0	0
0	0	0	0
462	359	583	363
4056	3714	2121	4960
7282	8251	6025	7093
3649	3219	2770	4216
7920	5560	4120	9288
15	0	73	208
232	431	94	313
2117	3168	3805	3833
399	382	0	691
1189	1217	360	1453
1749	1300	123	1057
3422	3583	2225	1551
0	0	0	0
0	0	0	0
2439	2045	1848	3235
1086	1227	1149	1051
0	0	0	0
0	43	0	24
0	0	0	4
2576	2065	1625	4652
1037	1022	1929	1231
323	214	214	377
0	0	0	0
0	0	0	0
0	0	0	59
64	0	0	19
1742	1349	933	1560
10754	9800	7728	10883
0	0	90	0
0	0	0	0
1620	867	593	1521
17	34	0	9
1025	473	843	604
43	70	0	154
216	301	59	409
45	0	19	9
671	249	628	298
0	0	0	0
184	161	116	220
23338	7442	13360	13485
0	139	285	404
0	0	0	0
353	777	211	717
752	916	831	676
388	663	0	367
0	0	0	0
11	0	20	133
513	196	228	569
1442	2540	548	1861
0	0	0	0
104	242	0	0
675	548	0	2711
246	308	410	451
109	0	0	65
0	0	0	0
1556	904	765	1989
88	32	0	18
1067	704	442	374
0	0	0	0
360	538	445	673
0	0	0	0
14	14	11	4
0	0	0	30
9	0	0	47
1664	960	1295	880
1143	1175	938	958
105	70	118	343
623	1085	518	1273
424	232	168	222
0	0	0	0
1980	2319	1523	3509
1817	1277	719	1534
0	0	0	0
505	683	438	1133
347	282	355	256
0	0	0	0
71	216	134	380
0	80	79	85
0	0	0	0
0	0	0	0
11397	14795	5845	12793
286	97	452	86
1461	1032	816	1744
1586	760	340	650
0	0	0	0
0	0	0	0
282	315	36	289
1278	1336	1637	1923
0	0	0	0
10912	11878	5347	17938
84	91	106	350
198	0	58	68
16799	14804	10270	20538
0	0	0	0
673	364	382	886
0	0	0	0
0	0	0	0
2790	2787	2367	1976
0	0	0	0
0	61	0	14
0	0	0	0
2301	1634	2111	2195
4210	2765	1810	3764
8142	9210	6560	10587
0	0	0	0
0	0	0	0
158	190	144	325
519	803	822	816
267	375	234	51
0	0	0	0
664	566	591	1359
0	0	0	0
0	0	0	0
691	1346	1885	2415
5854	6270	4118	11610
961	592	533	1667
3766	3759	688	2895
67	95	0	135
0	0	0	0
400	52	89	175
0	0	0	0
0	0	0	0
19	63	0	122
0	0	0	0
2287	2573	2707	2847
3293	4537	4885	4126
0	0	0	0
2417	2790	3001	3598
374	544	0	620
3356	4663	3606	4753
0	0	0	0
1782	1899	1294	1291
213	115	22	287
0	0	0	0
3206	4918	3667	3815
582	784	415	739
295	43	57	241
0	0	0	0
0	0	0	0
464	199	26	318
0	0	0	0
79	38	0	154
1321	2438	1394	2585
0	0	0	0
7882	7424	7327	8163
0	0	0	0
0	0	0	0
689	7174	869	928
2943	2240	1045	2028
47	303	0	42
0	0	0	0
123	100	29	41
123	100	29	41
160	263	22	556
364	162	258	343
225	193	438	263
298	1052	607	1162
401	380	148	200
13291	13414	10946	17455
1133	1311	1413	1276
155	226	454	541
0	0	0	0
0	0	0	0
0	18	0	0
738	412	393	663
212	65	0	221
0	0	0	0
12188	9558	9093	12662
0	0	0	0
0	0	0	0
2648	1443	1738	1352
1163	647	421	801
869	1372	194	739
63	205	30	109
5262	5914	4010	4965
185	38	102	0
24252	29400	16612	40798
349	364	425	537
979	898	568	766
0	0	0	0
243	141	476	47
520	200	52	737
23	57	44	31
1604	989	577	729
2929	2536	1972	3799
12330	13331	12419	16027
1409	801	1935	1772
0	0	0	0
900	429	499	536
1793	1191	1754	1613
161	91	228	173
69	93	0	163
0	0	0	0
12	0	12	0
2479	1871	2126	2501
299	66	25	292
83	0	0	19
9688	10112	4763	13555
4515	8104	9783	9512
1437	1225	2041	997
489	397	324	0
0	0	0	0
0	0	0	0
6	7	5	6
0	209	0	58
1129	1193	876	933
199	76	33	116
35	35	0	0
0	0	0	0
489	397	324	0
9973	8397	10560	17878
262	410	0	101
689	7174	869	928
32	0	45	57
0	18	0	11
1312	369	0	634
4939	4199	6318	5830
123	99	0	220
6091	4437	3718	7635
0	0	0	0
1854	1834	1591	2521
0	5	0	10
1290	1678	397	2645
82	33	0	0
0	0	0	0
149	0	0	112
222	154	120	28
903	1289	623	1532
0	0	0	0
153	560	24	367
513	231	459	998
581	635	311	676
505	732	2214	567
162	151	22	142
0	0	0	0
0	0	0	0
44	119	181	132
0	0	0	0
0	0	0	0
1068	780	607	326
1974	991	1513	1275
0	0	0	140
0	172	0	0
535	768	654	1320
650	176	411	649
51	0	0	0
0	0	0	0
12084	11815	8430	11073
0	0	0	0
769	212	0	150
0	0	0	0
904	608	279	480
831	1064	494	1341
574	329	608	728
0	0	0	0
176	33	51	97
0	0	0	0
910	672	880	446
106	275	80	171
7147	6121	6059	5011
322	598	0	724
0	0	0	0
0	0	0	0
795	732	1205	429
3221	3641	2804	2966
0	0	0	0
427	334	241	546
211	187	175	59
108	212	141	167
0	29	0	0
187	282	127	144
245	139	163	198
0	0	0	0
593	1259	518	717
3356	4663	3606	4873
25954	21601	16111	24826
5058	3297	4541	4966
0	0	0	68
325	96	56	159
0	0	0	0
27779	32317	20029	43637
0	0	0	0
0	86	0	64
98	0	0	0
0	0	0	0
0	0	0	0
870	743	75	923
264	0	250	79
0	0	0	0
860	519	415	686
709	758	709	868
0	0	0	0
0	0	0	0
0	0	0	0
0	0	0	0
2444	2015	527	2498
0	0	0	0
401	146	194	257
0	0	0	0
0	0	0	0
163	60	14	53
6813	9273	6076	7001
57	172	241	127
0	0	0	0
0	0	0	0
4804	4214	3335	5542
117	133	156	148
0	0	0	0
0	0	0	0
0	0	0	0
233	195	110	185
0	0	0	0
869	1595	458	1796
109	0	0	0
242	315	161	261
46	85	55	177
0	0	0	0
35	38	78	21
0	0	0	0
0	0	0	0
558	210	777	354
85	276	40	535
541	608	578	809
3404	3969	4345	4572
0	0	0	0
0	0	0	0
270	486	366	347
0	0	0	0
1407	2805	1599	2879
0	0	0	0
0	0	0	0
0	0	0	0
0	0	0	0
0	0	0	0
0	0	0	0
0	0	0	0
0	0	0	0
0	0	0	0
0	0	0	0
69	74	0	103
700	487	0	629
303	112	43	107
0	0	0	0
0	0	0	0
25	14	71	0
0	0	0	0
0	0	0	0
0	0	0	0
2375	1255	314	1438
0	0	0	0
0	0	0	0
64	42	0	23
5261	2995	2747	3962
0	0	0	0
0	124	53	61
0	0	0	0
0	0	0	0
2664	2352	1284	2854
0	0	0	0
780	604	1142	1019
0	0	0	0
627	436	305	483
42	0	0	0
93	13	0	98
0	0	0	0
5171	12393	3983	8603
1722	870	932	505
4426	2727	2818	3687
167	0	37	230
58	32	184	210
0	0	0	0
444	1109	97	920
0	0	0	0
0	0	0	0
2055	1314	2359	2349
677	1001	1062	1369
480	487	569	518
1822	1599	1058	1610
292	447	407	139
0	0	0	0
0	0	0	0
0	0	0	0
0	0	0	0
0	0	0	0
246	331	468	139
0	0	0	0
35	339	0	125
71	50	17	48
7506	6439	1780	6471
3707	2946	1101	2467
0	0	0	0
2651	1797	2003	3914
0	0	0	0
0	0	0	0
0	0	0	0
0	0	0	0
0	0	0	0
785	850	465	794
6808	7121	7150	13302
220	266	0	19
0	0	0	0
12190	11297	16264	17328
345	608	245	646
0	0	0	0
0	0	0	0
247	30	212	302
6320	9104	4221	10201
57	231	215	187
8505	9255	10049	8851
0	0	0	0
10604	13494	6141	13441
1733	1075	1294	1599
1252	970	8459	1431
0	0	0	0
114	0	128	47
0	0	0	0
0	0	0	0
0	0	0	0
0	0	0	0
118	96	90	96
1464	1000	503	2138
277	1091	1038	1183
0	0	0	0
630	418	163	137
95	0	78	170
327	124	62	294
1285	1591	1369	1413
711	577	602	655
38	22	46	49
1156	916	1406	929
627	509	0	676
0	0	0	0
0	42	0	23
0	0	0	0
1340	2101	788	4150
1074	772	1337	1102
567	230	448	594
2774	1757	128	2126
0	0	0	0
0	0	0	0
0	0	0	0
0	109	310	17
461	2108	1111	1467
280	202	0	0
0	0	0	0
270	603	234	445
4722	2491	2882	4556
57	230	0	560
96	91	16	67
0	0	0	0
0	0	0	0
2336	1183	621	1453
0	0	0	0
177	144	167	185
0	0	0	0
64	70	102	77
400	398	335	627
2422	2308	2194	1891
0	0	0	0
643	1497	570	900
0	0	0	0
0	0	0	0
0	0	0	0
248	187	56	267
79877	58555	54208	64689
378	341	292	239
63	60	0	85
618	1688	585	438
0	0	0	0
0	0	0	0
0	0	0	0
4287	2204	1752	3917
47	77	0	106
133	89	149	142
96	62	0	0
82	0	0	59
587	761	402	539
21	201	372	186
2060	2765	1611	2105
0	0	0	0
1482	448	392	464
0	0	0	0
0	0	0	0
505	522	500	660
1037	2456	1883	2406
5612	2579	3801	4955
18390	22129	16052	18494
18	372	52	66
0	0	0	0
0	0	0	0
43	86	0	57
0	0	0	0
0	0	0	0
0	0	0	0
763	1519	1313	1681
0	0	0	0
59	76	0	25
303	160	115	204
41	33	0	110
0	0	0	0
11	9	97	10
70	23	0	27
0	0	0	0
9348	8171	6602	10081
0	0	0	0
742	642	488	1136
7904	5180	12544	5151
0	0	6	11
619	122	198	601
34	0	16	15
0	0	0	0
772	976	255	709
20	20	0	18
837	1383	469	696
235	130	199	144
0	0	0	0
0	0	0	0
733	595	107	405
763	1519	1313	1681
0	0	0	0
0	0	0	0
808	625	838	1358
3227	1103	2349	696
0	0	0	0
0	0	0	0
0	0	0	0
0	0	0	47
163	352	26	285
579	325	380	427
0	0	0	0
0	0	0	0
1193	1051	732	1257
0	0	0	0
73	30	34	11
0	0	0	0
95	0	0	68
0	0	0	0
0	0	0	0
1705	1522	776	2654
0	0	0	0
0	0	0	0
0	0	0	0
93	0	176	223
0	0	0	0
1059	307	179	509
0	0	0	0
0	0	0	0
229	785	723	1234
0	0	0	0
0	24	0	0
0	0	0	0
0	0	0	0
0	0	0	0
0	0	0	0
138	196	98	366
232	117	589	507
842	1074	712	1566
179	421	0	268
40	87	177	0
0	0	0	0
0	0	0	0
1968	921	873	1051
2902	2650	1178	6003
172	186	434	334
0	0	0	0
2205	2331	1493	1725
1299	882	0	1161
2444	2015	527	2498
48	0	0	0
68	39	0	58
627	301	2536	716
0	0	0	0
698	263	109	504
0	0	0	0
305	187	317	522
1310	1825	408	1153
0	0	0	0
0	0	0	0
0	0	0	0
0	0	0	0
2301	1634	2111	2195
0	0	0	0
0	0	0	0
0	0	0	0
331	259	602	164
46	85	55	177
1068	780	607	326
578	166	547	494
10356	6244	8363	5954
10356	6244	8363	5954
11472	17182	9249	18140
5895	4226	3178	5893
5895	4226	3178	5893
668	870	956	1038
668	870	956	1038
1975	2222	1182	2083
27351	30313	18725	41182
5148	4608	2966	5452
56343	38985	42292	26561
5541	8725	4990	8963
5541	8725	4990	8963
2377	2021	3251	2771
2157	1290	856	1323
1440	1801	138	1892
2553	2784	2273	4161
6061	12884	5154	10881
3508	10100	2881	6720
0	0	0	0
2670	1787	2468	3378
4623	6992	3709	10795
1878	1442	913	1914
10138	7672	6556	9277
7397	6131	2911	6990
11113	11657	8522	17228
767	545	681	861
2749	1519	2138	1317
12967	15406	10275	13363
4641	3768	3294	3757
0	0	0	0
0	0	0	0
107380	106882	63085	117169
107380	106882	63151	117169
41473	36523	25635	44232
1471	2467	949	2440
1471	2467	949	2440
28279	12932	18195	18676
11507	6115	8123	8807
282	315	36	289
14037	12060	18078	17049
11639	9545	3483	8123
0	0	0	0
440	749	541	336
349	364	425	537
20540	17682	17136	18268
1947	3487	707	2616
4924	6146	4935	7871
4924	6146	4935	7871
4924	6146	4935	7871
5637	4524	5287	4062
2211	2609	2211	2298
1901	412	1612	2730
0	0	0	45
331	865	174	528
572	464	659	402
9863	9628	5063	16525
0	0	0	0
1134	823	2339	1326
675	548	0	2711
0	0	0	0
535	820	210	657
13853	12900	10782	16007
317	337	185	307
961	592	533	1667
0	0	0	0
12418	8223	11906	10950
2485	1894	1057	2732
1037	1022	1929	1231
0	0	0	0
42781	34411	22548	47904
0	0	0	0
2446	2455	884	2955
837	502	0	679
3550	5089	4104	5888
0	0	0	0
183	223	217	267
0	0	0	0
0	0	0	0
4477	3896	3914	3242
122	168	58	66
199	76	33	116
425	361	531	590
0	0	0	0
6478	4836	5310	7868
0	0	0	0
58	189	0	222
792	0	464	667
3305	2287	2479	3479
377	440	469	465
4188	3675	1697	2700
0	0	36	235
205	266	78	258
2196	2554	1247	3082
0	0	0	0
0	0	0	0
371	677	476	499
0	0	0	0
0	0	0	0
1566	2368	1306	2361
1025	473	843	604
1312	369	0	634
1312	369	0	634
0	0	0	0
9056	9527	5801	8585
13999	14494	7781	14638
35135	34240	21137	43738
5715	7176	4883	8368
105	312	99	220
0	0	0	0
1917	2057	616	2470
2207	1262	1520	2837
0	0	0	0
0	0	0	0
0	0	0	0
0	0	0	0
149	27	0	89
0	0	0	0
0	0	0	0
325	107	56	188
0	0	0	0
0	0	0	0
0	0	0	0
0	0	0	0
0	0	0	0
29	159	476	379
236	249	0	0
0	0	0	0
47	46	0	361
4252	4607	5798	5303
3441	3016	4326	3665
0	0	0	0
503	525	462	182
0	0	0	0
0	0	0	0
0	0	0	0
2158	1939	959	2506
2417	1905	1191	2372
0	47	0	0
0	0	0	0
0	99	64	61
4646	3676	3480	3421
0	0	0	0
0	0	0	0
0	0	0	0
0	0	0	0
0	0	0	0
0	0	0	0
127	258	0	114
0	0	0	0
0	0	0	0
0	0	0	0
73	0	275	0
0	0	0	0
854	1467	1168	1040
0	0	0	0
0	0	0	0
0	0	0	0
5483	3140	2888	2772
1109	1250	700	1604
574	329	608	728
347	282	355	256
0	0	0	0
0	0	0	0
0	0	0	0
0	0	0	0
516	616	556	710
0	0	0	0
0	0	0	0
1037	2456	1883	2406
827	1054	970	821
296	265	177	769
1793	1210	1822	1742
0	0	0	0
6461	7989	1144	108
0	0	0	0
0	0	0	0
0	0	0	0
5748	7203	4883	8609
5715	7176	4883	8368
1238	1637	304	2264
0	0	0	0
12212	10093	9449	14117
0	0	0	0
0	0	0	0
0	15	62	0
0	221	93	94
14520	12371	11470	19025
0	0	0	0
0	0	0	0
496	34	0	74
0	0	0	0
1228	1727	866	1127
0	0	0	0
0	0	0	0
0	0	0	0
0	0	0	0
0	0	0	0
1862	1194	889	1238
441	561	655	762
723	2300	910	1278
0	0	0	0
0	0	0	0
0	0	0	0
3269	2562	1504	2777
0	0	0	0
0	0	0	0
0	0	0	0
0	0	0	0
35785	31894	28980	40969
0	0	0	0
287	368	260	488
0	0	0	0
0	0	0	0
0	0	0	0
992	498	702	756
0	0	0	0
0	0	0	0
125	25	30	150
0	0	0	0
114	124	253	342
0	0	0	0
0	0	0	0
0	0	0	0
0	0	0	0
0	0	0	0
0	0	0	0
287	160	0	353
0	0	0	0
3318	2148	1781	1405
218	325	49	362
166	0	157	343
166	0	157	343
1335	1019	1000	1181
3422	3583	2225	1551
3422	3583	2225	1551
61	173	231	137
478	217	349	324
38	0	0	25
428	126	74	280
0	0	0	0
2175	432	360	1526
2402	1137	1836	2177
10	0	19	18
0	0	0	0
285	144	0	377
16683	16499	11602	25649
0	65	0	0
0	0	0	0
0	0	0	0
0	0	0	0
0	0	0	0
381	0	22	149
309	359	809	953
0	0	0	0
110	18	0	43
2967	2111	802	1295
1242	1361	1214	1087
0	0	0	0
0	0	0	0
733	0	0	230
901	968	406	805
0	0	0	0
0	0	0	0
2453	3109	5949	2570
0	0	0	0
354	400	389	280
0	0	0	0
0	16	0	0
0	0	0	0
312	360	259	651
0	0	0	0
0	0	0	0
0	0	0	0
1143	1175	938	958
0	0	0	0
0	0	0	0
0	0	0	0
1613	1009	580	2087
97	158	0	315
0	0	0	0
0	0	0	0
0	0	0	0
0	0	0	0
0	77	0	136
866	360	485	527
1015	681	342	1078
2557	1769	1415	2716
71	216	134	380
11838	11571	8895	15510
2983	1713	2243	2403
265	584	359	544
6251	5321	7344	5941
0	37	6	0
80	0	0	8
18	37	0	25
179	91	148	0
3087	3738	1096	4133
0	0	0	0
2004	1321	2469	2201
514	142	0	261
4394	4538	2080	5948
131	114	83	79
514	790	365	1118
0	0	0	0
565	497	535	614
0	0	0	0
0	0	0	0
627	509	0	676
415	329	246	278
0	0	0	0
0	0	0	0
0	0	0	0
221	169	395	246
10768	9127	6558	9567
377	607	129	763
0	0	0	0
0	0	0	0
0	0	0	0
0	0	0	0
0	0	0	0
449	9	53	101
0	0	0	0
106	104	0	325
103	139	712	583
0	0	0	0
559	191	167	343
58	189	0	222
1074	772	1337	1102
0	0	0	0
88	30	12	101
0	0	0	0
1903	1500	1567	1213
0	0	0	0
1120	1817	791	1661
0	0	0	31
0	0	0	0
0	73	0	100
0	0	0	0
0	0	0	0
0	0	0	0
323	38	0	124
363	557	358	817
0	0	0	0
102	83	0	13
880	694	453	452
0	0	0	0
0	0	0	0
71	192	582	552
0	0	0	0
0	0	0	0
327	48	424	186
0	0	0	0
0	0	0	0
0	0	0	0
0	52	71	67
0	0	0	0
0	0	0	0
0	0	0	0
0	64	15	0
0	0	0	0
0	0	0	0
782	1268	1121	1414
0	0	0	0
0	0	0	0
214	549	1423	675
0	0	0	0
0	0	0	0
1284	1140	739	1564
0	0	0	15
20	0	0	0
12	98	114	87
0	0	0	0
1065	2275	657	1088
278	0	0	275
0	0	0	0
145	106	241	131
0	0	0	0
0	0	0	0
0	0	0	0
320	61	0	8
0	0	0	0
0	28	0	0
13991	7741	8273	7351
4244	2806	3912	3963
0	0	0	0
128	207	450	66
461	456	391	1191
227	76	278	407
0	0	0	0
286	158	0	289
71	72	0	254
0	0	0	0
0	0	0	0
247	100	0	471
0	0	0	0
0	0	0	0
0	0	0	0
0	0	0	0
0	0	0	0
0	0	0	0
0	0	0	0
88	129	0	476
0	0	0	0
0	0	0	0
0	0	0	0
0	0	0	0
0	0	0	0
1713	2011	1898	1734
0	0	0	0
0	0	0	0
0	0	0	0
114	27	0	30
0	75	0	17
0	0	0	0
0	0	0	0
811	809	681	1478
8351	6441	7758	10361
20787	13775	15442	18553
8351	6441	7758	10361
1617	2138	2757	2199
1546	1905	1053	1687
0	0	0	0
9699	12933	4820	15880
9699	12933	4820	15880
9699	12933	4820	15880
9699	12933	4820	15880
0	0	0	0
0	0	0	0
0	0	0	0
7877	9074	7263	7694
279	156	68	226
965	451	1050	659
706	310	736	891
0	0	0	0
0	0	0	0
0	0	0	0
1032	314	549	1332
284	0	269	96
0	0	0	0
0	0	0	0
13898	10592	11352	16064
6294	2173	5136	4121
0	0	0	0
0	0	0	0
2758	3233	1483	2332
0	0	0	0
0	0	0	0
0	0	0	0
0	0	0	0
0	0	0	0
49	135	28	167
689	7174	869	928
0	0	0	0
0	0	0	0
0	0	0	148
0	0	0	0
1129	2363	505	2049
0	0	0	0
1642	2015	1666	2827
1546	1905	1053	1687
0	0	0	0
0	0	0	0
0	0	0	0
30	6	0	0
17330	15813	9418	24649
0	0	0	0
0	0	0	0
273	159	0	271
0	0	0	0
0	0	0	0
17330	15813	9418	24649
17330	15813	9418	24649
17330	15813	9418	24649
0	0	0	0
0	0	0	0
0	0	0	0
0	0	0	0
0	0	0	0
1772	1416	865	2178
0	0	0	0
269	50	118	37
0	0	0	0
0	0	0	0
0	0	0	0
9372	16172	7004	14170
2928	2594	1431	2747
0	0	0	0
0	0	0	0
0	0	0	0
0	0	0	0
0	0	0	0
0	0	0	0
0	0	0	0
0	0	0	0
0	29	134	0
0	0	0	0
0	0	0	0
1754	1042	865	823
0	0	0	0
145	148	145	281
0	0	0	0
0	0	0	0
8960	7697	8376	6515
462	359	583	363
105	0	160	0
1437	1225	2041	997
1437	1225	2041	997
0	0	0	0
2260	1960	2750	1803
9869	5501	5876	7317
0	0	0	0
5668	2979	4033	4294
106	197	316	503
0	0	0	0
4342	2936	1800	4226
0	0	0	0
0	0	0	0
0	0	0	0
0	0	0	0
0	0	0	0
36	0	0	0
1374	2183	1298	2323
39	0	0	9
0	0	0	0
0	0	0	0
2055	1314	2359	2349
0	0	0	0
44	50	0	0
623	575	215	433
0	0	0	0
88	271	67	126
0	0	0	0
32	15	0	17
0	0	0	0
468	392	295	653
468	392	295	653
0	0	0	0
0	0	0	0
0	0	0	0
0	0	0	0
55	0	0	12
0	0	0	0
516	443	370	495
1382	1642	345	1614
54	0	0	0
0	0	0	0
0	0	0	0
0	0	0	0
7243	5548	433	1970
0	0	0	388
42	81	390	30
0	0	0	0
0	0	0	0
2287	2573	2707	2847
573	396	162	340
0	0	0	0
0	0	0	0
3237	3234	1564	4271
3237	3234	1564	4271
0	0	0	0
0	0	0	0
0	0	0	0
0	0	0	0
394	122	603	485
1872	1304	550	1258
0	0	0	0
0	0	0	0
0	0	0	0
0	0	0	0
0	0	0	0
0	0	0	0
0	0	0	0
0	0	0	0
0	0	0	0
1238	1637	304	2264
0	0	0	0
0	0	0	0
0	0	0	0
0	0	0	0
0	0	0	0
0	0	0	0
0	0	0	0
0	0	0	0
1959	2330	1662	2994
0	0	0	0
0	0	0	0
0	0	0	0
242	112	327	589
0	0	0	0
1299	882	0	1161
0	0	0	0
0	0	0	0
0	0	0	0
0	0	0	0
0	0	0	0
0	0	0	0
0	0	0	0
0	0	0	0
0	0	0	0
0	0	0	0
0	0	0	0
367	618	211	192
0	0	0	0
0	0	0	0
0	0	0	0
0	0	0	0
0	0	0	0
0	0	0	0
0	0	0	0
0	0	0	0
0	0	0	0
0	0	0	0
0	0	0	0
238	360	150	0
0	0	0	0
103	313	292	507
0	0	0	0
0	0	0	0
0	0	0	0
0	0	0	0
0	0	0	0
0	0	0	0
0	0	0	0
0	0	0	0
0	0	0	0
0	0	0	0
0	0	0	0
5869	3312	3378	6104
0	0	0	0
0	0	0	0
427	173	51	168
2075	995	1072	1158
833	574	235	463
0	0	0	0
73	267	242	492
0	0	0	0
0	0	0	0
23	0	217	124
0	0	0	0
0	0	0	0
0	0	0	0
180	146	0	0
0	0	0	0
0	0	0	0
0	0	0	0
955	961	253	1852
0	0	0	0
2552	2006	723	2057
1502	538	1256	2118
65	0	123	310
0	0	0	0
0	0	0	0
0	0	0	0
0	0	0	0
2417	2790	3001	3598
0	0	0	0
0	82	0	0
0	0	0	0
0	0	0	0
0	0	0	0
149	0	0	112
302	341	855	502
0	0	0	0
0	194	0	0
0	0	0	0
0	0	0	0
0	0	0	0
0	0	0	0
627	1349	1277	958
0	0	0	0
276	140	19	144
1983	1777	1415	2267
0	0	0	0
0	0	0	0
58	0	0	0
0	0	0	120
0	0	0	0
0	0	0	0
0	0	0	0
0	0	0	0
0	0	0	0
0	0	0	0
0	0	0	0
0	0	0	0
3334	3587	2486	3500
0	0	0	0
1086	1227	1149	1051
419	584	57	108
15	75	102	139
0	0	0	0
0	0	0	0
0	0	0	0
0	0	0	0
0	0	0	0
101	122	0	316
205	14	0	31
0	0	0	0
0	0	0	0
0	0	0	0
0	0	0	0
0	0	0	0
106	134	0	0
0	0	0	0
0	0	0	0
0	0	0	0
0	0	0	0
0	0	0	0
0	0	0	0
0	0	0	0
700	487	0	629
0	0	0	0
1966	1265	1516	1738
153	67	24	52
0	0	0	0
193	120	62	162
0	0	0	0
0	0	0	0
0	58	153	48
0	0	0	0
470	501	111	686
0	0	0	17
0	0	0	0
0	0	0	0
0	0	0	0
0	0	0	0
0	0	0	0
0	82	0	136
0	0	0	0
0	0	0	0
0	0	0	0
0	0	0	0
2880	1685	4249	4390
0	0	0	0
0	0	0	0
0	0	0	0
0	0	0	0
0	0	0	0
0	0	0	0
74	181	404	250
0	0	0	0
370	701	610	367
0	0	0	0
0	0	0	0
0	0	0	0
0	0	0	0
0	0	0	0
0	0	0	0
0	0	0	0
737	1622	897	1230
1576	1098	467	1327
0	0	0	0
0	0	0	0
0	0	0	0
0	0	0	0
0	0	0	0
17	0	0	0
986	1064	454	1136
0	0	0	0
0	0	0	0
245	139	163	198
752	916	831	676
0	0	0	0
0	0	0	0
54167	42554	34987	44073
51828	41722	34141	41736
2327	953	1021	2843
2327	953	1021	2843
198	0	58	68
0	0	0	0
0	0	0	0
0	0	0	0
0	0	0	0
0	0	0	0
10138	7672	6556	9277
10138	7672	6556	9277
0	0	0	0
0	0	0	0
0	0	0	0
0	0	0	0
0	0	0	0
0	0	0	0
10604	13494	6141	13441
0	0	0	0
4188	4306	3278	3811
0	0	0	0
0	0	0	0
0	0	0	0
0	0	0	0
52	164	353	340
0	0	0	72
0	0	0	0
691	981	1114	1174
0	0	0	0
0	0	0	0
939	224	503	456
0	0	0	0
357	277	555	615
68476	64664	60802	63450
0	0	0	0
0	0	0	0
627	509	0	676
0	0	0	0
627	711	294	871
10033	9830	7915	13581
0	0	0	0
23	28	11	0
0	0	0	0
0	0	0	0
12188	9558	9093	12662
12259	11771	7898	13519
0	0	0	0
0	454	60	1119
784	806	693	1220
784	806	693	1220
0	0	0	0
20346	16168	12799	18653
269350	236618	164863	261264
296	330	455	664
0	0	0	0
12134	7464	9400	9765
1086	501	653	1379
264	0	250	79
2083	655	2242	867
0	0	0	0
7397	6082	2911	6901
0	0	0	0
5681	2283	3342	3368
0	0	0	0
0	0	0	0
0	0	0	0
0	0	0	50
0	0	0	0
0	0	0	0
0	0	0	0
0	0	0	0
0	0	0	0
0	0	0	0
0	0	0	0
0	0	0	0
0	0	0	0
0	0	0	0
0	0	0	0
158	146	71	88
837	502	0	679
837	502	0	679
632	743	791	685
0	0	0	0
0	0	0	0
0	0	0	0
0	0	0	0
0	0	0	0
0	0	0	0
43	171	0	101
0	0	0	0
1140	581	555	861
0	0	0	0
0	41	0	179
0	0	0	0
0	42	0	0
2015	2278	2385	2262
0	0	0	0
0	0	0	0
2909	1908	791	3261
8856	10091	3700	8575
2158	1939	959	2506
63504	54940	36276	63432
1782	1899	1294	1291
36006	19800	23563	25379
0	0	0	0
6091	4437	3718	7635
0	0	0	0
0	0	0	0
0	0	0	0
1297	810	259	1482
0	0	0	0
129	139	285	193
0	0	0	0
0	209	0	58
75	15	0	67
1054	429	701	335
109	0	0	65
3155	3223	3297	2589
399	382	0	691
1506	2150	2508	1873
0	0	0	0
0	0	0	0
0	0	0	0
0	0	0	0
2233	1238	1186	2495
105	102	79	188
268	174	127	48
145	250	405	209
2257	2169	1352	3438
4783	6323	2581	7925
18656	18258	14443	17317
0	0	0	0
795	732	1205	429
0	0	0	0
0	0	0	0
12436	7350	7684	8192
4810	4297	2176	3560
0	0	0	0
605	1569	583	799
0	0	0	0
0	0	0	0
0	0	0	0
0	0	0	0
1619	824	1931	550
1127	1185	836	1341
23	94	176	42
1506	2150	2508	1873
285	144	0	377
0	0	0	0
0	0	0	0
0	0	0	0
0	0	0	0
0	0	0	0
0	0	0	0
0	0	376	179
0	0	0	0
0	0	0	0
70	456	199	913
842	1074	712	1566
0	0	0	0
1196	421	0	512
0	0	0	0
2784	2153	4376	4023
0	170	0	135
0	0	0	0
0	0	0	0
738	412	393	663
273	2155	517	490
0	0	0	0
0	0	0	0
0	0	0	0
0	0	0	0
0	110	0	121
328	228	711	590
225	488	231	337
1902	880	904	2195
0	0	0	0
3316	1881	2417	1297
2596	1425	1394	2308
0	0	0	0
3160	3821	379	1557
0	0	0	0
0	0	0	0
6234	4164	2389	4689
1641	1397	1584	1845
935	335	271	1034
5976	7575	4561	5003
1641	1397	1584	1845
505	522	500	660
0	0	0	0
0	0	0	0
[truncated: 1,185 more rows]

## Sheet: BACCAC_30days
18487	12041	17077	20327
11761	11541	10835	11388
24752	13350	15276	16795
0	0	0	0
15601	6165	9428	15306
8479	4851	5967	3059
150	22	20	70
548	399	523	370
267	330	326	501
262	0	310	67
1849	442	498	249
0	0	0	0
4183	1233	723	2788
10793	4695	7765	7814
0	0	0	0
50903	38826	35713	56161
182	109	86	0
348	733	584	1652
0	147	177	204
0	0	0	0
0	0	0	0
56940	21629	23298	22140
1152	428	241	154
0	180	0	0
1702	970	1244	1250
0	0	0	0
1956	1753	1434	530
556	119	451	67
527	316	935	1134
231	184	167	240
13411	7757	8325	5943
2581	1354	1147	547
3653	503	635	1141
5918	6549	3971	6707
9031	2921	3961	4882
12461	4088	8741	7012
710	417	644	26
14427	3348	4242	1485
1154	344	318	1023
83036	45297	25009	45978
112	721	508	460
3267	2031	3570	1937
1665	676	1393	1504
19115	8045	7534	6740
0	0	0	0
861	156	415	291
9516	5963	9842	9103
1599	979	1478	1566
0	0	0	0
571	303	0	97
0	0	0	0
3600	2213	2624	2057
0	0	0	0
15825	6493	8271	7187
1660	246	991	654
14073	10222	10846	9469
347	166	265	575
3858	4165	3379	3583
344	599	148	284
8994	4996	3501	4591
1164	382	409	356
1276	544	382	834
0	0	0	0
0	0	5	81
6478	5070	6078	9337
6880	2796	2196	1379
1237	0	168	451
1466	216	743	654
5341	3558	3195	3406
1793	1631	2596	1851
1777	869	2039	3346
1878	555	1163	1085
571	537	508	1267
0	0	0	0
0	0	0	0
172	327	208	238
262	341	293	184
0	0	0	0
2084	1055	1292	490
0	0	139	242
11869	7235	8621	13566
4278	3459	2107	3309
6023	5986	4277	5408
29109	21571	18384	29948
20766	13229	9758	11273
958	712	967	186
2429	1904	1041	1656
687	145	318	189
437	499	581	223
1633	1003	1469	2476
0	34	0	0
0	0	0	0
457	316	343	362
9283	6394	4396	7264
1097	2220	879	1335
888	271	773	1133
0	0	0	0
387	197	267	166
150	94	207	392
0	0	0	0
292	364	824	95
0	0	0	0
141	153	318	412
8989	7476	2974	5697
985	246	644	234
379	126	22	54
3366	1927	2712	2701
91	105	0	0
840	638	543	431
43	0	12	0
4212	2184	2057	3177
0	0	0	0
0	0	0	0
14400	8028	11887	11436
28012	16245	21010	16666
2214	847	1707	558
73	0	22	188
2549	837	1302	1429
95	0	50	44
4042	6211	1816	2376
8400	5845	4241	5068
6966	6740	6154	4777
2588	2585	1926	2253
223	117	166	243
4724	3145	2829	3479
700	556	995	935
1399	857	1510	1259
56	888	46	73
2059	814	767	1262
1983	505	740	754
665	581	88	370
1920	1039	800	747
210	0	0	0
593	258	856	753
7715	2444	3074	2970
1669	349	972	1181
1683	836	1252	1275
27448	3450	5624	3291
0	0	0	0
695	466	492	687
0	0	0	0
0	0	0	0
1177	933	1548	1331
11761	9853	13084	12939
68	71	97	94
0	0	0	0
2266	414	1062	1547
22592	13713	9102	17733
0	0	0	0
560	222	577	200
718	621	463	617
461	20	149	48
2741	1476	3278	2266
4147	2500	2919	1508
4713	893	1865	1596
2266	414	1062	1547
284	111	36	259
1526	1265	1279	1628
0	0	0	191
0	0	0	0
0	0	0	0
437	139	459	626
0	0	0	0
0	0	0	0
2087	281	1991	1009
3911	2413	4127	2295
9100	3458	7903	6493
0	23	52	6
0	0	0	0
1215	1180	666	639
0	0	0	0
170	102	0	0
0	0	0	0
834	250	242	205
493	789	585	554
0	0	0	0
978	572	674	644
0	0	0	0
0	0	0	0
3864	2825	3847	3656
14183	3365	9284	3756
10663	9442	11494	11281
2935	1049	1634	4169
4128	1214	1591	1500
173	28	172	228
0	0	0	0
14115	9181	7276	10978
4121	4555	5497	4472
220	117	8	0
544	577	645	443
529	327	168	435
316	25	159	51
0	0	18	0
170	122	0	0
1431	790	1140	872
369	103	290	65
0	0	0	0
1789	1631	471	1431
155	167	139	0
3664	4545	3036	2699
0	0	0	0
6594	2140	3593	3466
628	315	312	233
0	0	0	0
4659	3351	3938	3311
603	156	493	562
0	0	0	0
2504	2949	2563	3008
3132	2211	1691	3862
155	57	381	412
1707	542	790	312
2650	1476	1896	3698
0	7	58	8
945	810	955	612
1249	108	964	1091
136	0	0	0
3294	3087	3858	5090
3391	845	986	3247
1841	1805	1966	2536
1737	2016	2077	1918
0	0	0	0
0	0	0	0
3883	1334	1377	4410
874	1019	520	672
2001	1160	2801	830
3105	997	1710	1802
4748	3331	3199	5541
0	0	0	0
0	0	0	0
0	0	0	0
0	365	484	127
13	0	0	0
62	0	30	115
9089	3806	6308	6223
0	0	41	0
54003	41591	36121	59858
2226	555	1802	735
323	19	18	262
8219	8285	10502	7199
120	143	130	297
0	0	0	0
0	0	0	0
579	260	824	271
4049	2270	1696	2566
6076	2857	3648	5060
582	0	53	0
0	0	0	0
0	0	0	0
1008	901	1056	905
19	71	52	270
745	461	304	220
6587	5434	4603	6854
0	0	0	0
18868	7271	15326	8166
0	0	0	0
0	0	0	0
5778	3539	4604	4975
6758	3687	3219	6119
41	0	32	72
354	310	607	398
883	336	765	732
18496	8339	11104	7562
2624	1281	965	2864
3985	2449	2296	1600
2492	1734	1269	2988
22478	9939	8365	17936
1035	1678	907	948
705	133	534	1103
30	0	0	98
723	358	811	981
11557	5015	5683	3206
437	33	267	17
3156	2077	1983	1960
519	233	462	395
0	0	0	0
27492	29801	21199	24116
0	0	0	0
345	360	61	220
20590	14185	14051	12537
14	61	199	0
536	244	504	324
0	0	0	0
1353	1361	2154	2276
0	0	0	0
1087	1117	660	1013
1485	353	345	1002
555	125	789	0
1328	159	360	1576
0	0	0	0
0	0	0	0
4516	1957	3542	3949
4052	439	1335	1996
95	0	50	44
8884	2607	7670	5064
2061	1365	1117	184
130	0	0	0
28899	17062	17099	13818
4672	2426	3796	3083
5072	2595	2580	5150
2006	813	947	1152
1849	1011	1424	1073
3199	3400	2973	1346
3199	3400	2973	1346
37839	27810	22653	26098
198	300	110	489
20762	13196	8701	15874
10473	5041	5513	10086
0	0	0	0
1070	668	738	458
6250	4301	6715	6655
117412	80751	77118	80557
0	0	0	0
391	195	420	174
0	0	0	0
5478	3525	5040	5221
2765	3284	896	2798
7589	6903	5928	10990
389	0	70	251
1264	708	2011	297
0	0	0	0
383	609	480	608
28309	23308	22898	19126
536	244	504	324
371	466	230	196
3419	686	1112	641
3358	1164	2108	3334
0	0	0	0
0	0	0	0
6178	2211	2277	2370
1714	1614	535	1397
2128	1111	1356	864
70570	71166	54805	73103
217	71	192	185
0	0	0	0
1888	1991	2530	1907
1809	186	109	609
1970	928	1638	787
0	0	0	0
1211	1499	422	1551
1659	765	766	695
705	414	740	325
1605	707	142	1728
55	0	66	0
37	0	0	0
64	0	91	0
2309	1378	1042	766
899	0	344	275
806	223	177	29
1736	638	449	345
182	35	26	0
264	273	228	356
38	41	168	7
198	45	32	75
7	21	4	2
266	169	535	308
2827	1836	2494	2761
0	0	0	0
10903	6079	5215	7300
0	0	0	0
1606	324	1404	2144
0	0	0	0
720	467	212	862
211	0	50	16
596	1115	570	1062
0	0	0	0
58843	35719	35460	41840
0	0	0	0
219	66	30	12
3097	3081	1510	1822
0	0	0	0
9313	5183	5095	4472
24	21	0	11
1190	137	433	537
4546	1546	1775	2263
19642	10459	13838	10732
0	0	0	0
1136	676	633	352
0	0	0	0
17	153	84	65
0	0	0	0
82	8	59	195
6390	6424	6313	7244
0	0	0	0
48	29	24	0
3539	4055	4599	5628
0	145	560	493
728	753	842	848
1187	483	1586	953
1011	893	1053	784
1034	1633	867	1233
1601	1093	792	713
1601	1093	792	713
319	118	214	211
3847	3657	4313	3207
611	314	968	656
12397	15621	9575	11485
0	0	0	0
37	0	445	0
0	0	0	0
273	210	190	91
489	137	298	287
6365	1931	2302	3711
0	0	0	0
0	0	0	0
2581	1354	1147	547
184	0	410	0
21444	8599	5178	13563
32	284	206	59
11869	7235	8621	13566
1657	584	757	712
4052	439	1335	1996
0	0	0	0
110	80	242	334
3586	2041	1879	2340
564	1097	1272	616
0	0	0	0
0	0	0	0
4376	2079	3364	1254
2369	722	1463	2659
3009	1262	1189	501
0	0	0	0
1217	703	341	1769
942	554	30	320
71	180	91	439
0	88	0	23
115	35	52	24
984	375	827	653
14526	10195	6655	6256
194	0	123	0
83	49	0	142
1194	896	571	674
11443	8217	7918	4779
2106	969	1030	1198
2222	1281	1967	943
0	0	0	0
1281	338	1481	1380
16492	10095	9448	14666
203	156	94	49
0	0	0	0
1179	618	979	1887
78	245	303	0
0	0	0	0
2596	1763	662	720
0	0	0	0
945	513	202	442
0	0	0	0
0	0	0	0
561	0	114	329
97	58	0	335
475	112	257	226
0	0	0	0
22	248	102	240
464	1040	341	418
5788	5305	5142	4412
0	0	0	0
0	0	0	0
221	413	509	362
4858	4026	2653	3284
9927	6186	3724	5423
2982	1540	1902	1203
8146	5514	5919	6429
237	119	24	0
635	114	452	506
4354	2033	3537	3151
518	49	532	191
774	531	370	1407
1767	1584	855	935
6090	2833	4552	1432
0	0	0	0
0	0	0	0
2750	724	1976	985
1039	530	878	725
0	0	0	0
0	0	41	0
0	0	9	0
3771	2041	3004	3138
709	1050	922	1726
247	249	151	260
0	0	0	0
0	0	0	0
21	0	0	10
0	0	0	0
1458	1281	843	1464
9138	6448	7583	5095
0	66	0	291
0	0	0	0
1127	1265	1776	1683
60	166	90	188
564	1097	1272	616
14	0	0	0
316	129	428	132
18	128	0	120
587	512	124	166
0	0	0	0
542	329	48	370
22389	9990	8503	18144
188	0	111	667
0	0	0	0
888	194	260	782
624	904	488	449
440	408	75	526
0	0	0	0
71	36	0	0
1067	518	188	405
2217	1718	1496	1493
0	0	0	0
86	179	46	134
2925	1255	1749	1511
194	93	241	450
0	156	85	358
0	0	0	0
1873	1238	921	439
112	25	76	70
1132	1159	609	1061
0	0	0	0
1009	160	402	319
0	0	0	0
253	13	0	12
0	0	13	30
0	15	109	87
1061	476	1193	1060
2515	1178	1245	1503
219	205	134	317
1019	648	1271	1094
441	75	295	256
0	0	0	0
2643	1635	2740	2235
1816	838	1350	826
0	0	0	0
1730	2022	458	1470
557	137	176	574
0	0	0	0
366	205	113	204
181	52	9	33
0	0	0	0
0	0	0	0
24868	11900	8572	6073
205	0	111	64
1759	1768	988	1486
1804	1611	904	461
0	0	0	0
0	0	0	0
263	0	253	126
1520	1478	966	1378
0	0	0	0
11738	10021	12543	12087
173	96	293	0
58	222	36	150
25106	12713	13949	14246
0	0	0	0
1073	501	488	362
0	0	0	0
0	0	0	0
2728	1619	2310	2355
0	0	0	0
29	130	47	81
0	0	0	0
3294	3087	3858	5090
3268	1902	1848	2431
13142	7929	8231	9299
0	0	0	0
0	0	0	0
326	39	83	390
301	146	539	438
972	22	60	2797
0	0	0	0
1305	1051	716	1581
0	0	0	0
0	0	0	0
1036	1507	1017	1409
5339	4795	5702	3953
1381	633	919	725
4917	460	1947	2783
64	0	39	0
0	0	0	0
167	592	151	349
0	0	0	0
0	0	0	0
19	17	30	0
0	0	0	0
572	223	1443	4005
4691	4178	4991	5847
0	0	0	0
3371	3644	4992	2648
396	406	740	342
2314	1303	2214	2545
0	0	0	0
2666	1196	1329	872
328	10	74	169
0	0	0	0
4026	3082	3132	2521
312	1140	596	1000
315	231	76	94
0	0	0	0
0	0	0	0
287	47	255	98
0	0	0	0
329	130	46	453
2475	822	1092	1940
0	0	0	0
10932	6116	4782	6665
0	0	0	0
0	0	0	0
27448	3450	5624	3291
2019	1580	2432	1319
22	120	0	0
0	0	110	0
0	106	60	0
0	106	60	0
806	301	164	560
244	281	226	228
119	387	351	344
955	951	1112	1259
362	96	329	240
15742	5257	11624	6745
1645	1265	995	983
503	252	0	69
0	0	0	0
0	0	0	0
0	0	103	0
750	119	108	992
203	0	135	24
0	0	0	0
9134	7614	9673	10155
0	0	0	0
0	0	0	0
1796	716	1133	1096
1727	588	758	1248
763	533	826	816
91	49	25	0
9283	6394	4396	7264
133	40	96	152
34394	16385	25363	22749
715	214	136	424
453	543	369	750
0	0	0	0
149	0	81	31
235	446	21	539
45	80	45	0
773	471	379	764
3704	894	1215	583
23114	12466	14262	15958
1887	1089	877	2778
0	0	0	0
683	288	312	330
1108	1766	1351	1429
61	110	50	29
45	123	37	137
0	0	0	0
122	0	0	28
3527	3324	4135	5337
129	70	285	0
0	231	145	93
10476	8786	6708	6599
6478	5070	6078	9337
3686	2131	1981	2809
492	189	171	110
0	0	0	0
0	0	0	0
6	0	0	1
0	0	0	0
1136	714	576	899
143	141	198	281
0	0	0	8
0	0	0	0
492	189	171	110
8303	4794	7272	11997
125	0	116	34
27448	3450	5624	3291
30	178	0	0
85	16	15	0
579	260	824	271
4173	5310	3903	4322
0	0	238	82
6666	4270	5791	3274
0	0	0	0
4040	1150	2168	2699
0	0	0	41
4203	1859	1110	1518
59	0	80	0
0	0	0	0
499	171	232	200
182	109	86	0
994	399	910	418
0	0	0	0
757	438	715	366
82	294	266	26
226	0	406	85
1044	705	934	2435
368	273	196	445
0	0	0	0
0	0	0	0
281	25	103	171
0	0	0	0
0	0	0	0
593	422	316	996
3523	928	960	2117
0	156	0	0
18	193	574	510
1364	899	858	1946
805	590	365	227
16	0	0	0
0	0	0	0
16223	9268	12158	16717
0	0	0	0
642	50	45	288
0	0	0	0
691	230	894	216
1186	859	482	341
1422	87	210	151
0	0	0	0
117	140	21	12
0	0	0	0
580	260	549	247
509	0	115	114
6891	7472	4867	5665
661	138	466	372
0	0	0	0
0	0	0	0
2029	774	371	570
5513	2326	2274	5208
0	0	0	0
833	268	511	530
227	0	0	154
265	53	48	78
51	0	0	0
512	276	395	0
258	63	401	132
0	0	0	0
524	117	514	838
2984	1303	2214	2576
24853	17534	14053	24383
6867	6002	5742	4126
15	0	0	0
339	381	207	556
0	0	0	0
37972	18951	28934	26416
0	0	0	0
17	0	55	111
93	0	0	0
0	0	0	0
0	0	0	0
479	317	328	284
420	0	103	118
0	0	0	0
740	257	489	39
1212	405	610	199
0	0	0	0
0	0	0	0
0	0	0	0
0	0	0	0
2743	2426	1731	1942
0	0	0	0
282	330	108	381
0	0	0	0
0	0	0	0
0	52	210	122
10713	14642	8097	9919
0	71	99	127
0	0	0	0
0	0	0	0
5241	3179	3958	4247
67	20	0	11
0	0	0	0
0	0	0	0
0	0	0	0
120	100	158	65
0	0	0	0
1724	800	1289	928
325	0	0	0
510	146	566	196
133	319	99	104
0	0	0	0
0	162	0	42
0	0	0	0
0	0	0	0
0	282	338	466
407	73	828	534
443	143	496	509
5404	3306	3734	3806
0	0	0	0
0	0	0	0
776	713	135	1039
0	0	0	0
3343	1492	2267	1068
0	0	0	0
0	0	0	0
0	0	0	0
0	0	0	0
0	0	0	0
0	0	0	0
0	0	0	0
0	0	0	0
0	0	0	0
0	0	0	0
0	0	89	0
430	0	272	134
132	16	0	58
0	0	0	0
0	0	0	0
8	57	0	0
0	0	0	0
0	0	0	0
0	0	0	0
740	806	945	1683
0	0	0	0
0	0	0	0
12	0	70	126
4285	2475	3287	2977
0	0	0	0
54	20	231	143
0	0	0	0
0	0	0	0
3667	1325	2581	2681
0	0	0	0
1798	852	552	1080
0	0	0	0
514	800	638	96
0	0	41	0
267	0	145	84
0	0	0	0
20239	9057	5754	8962
488	1041	834	1717
2899	1977	3867	3198
66	0	8	53
372	67	182	0
0	0	0	0
882	88	186	490
0	0	0	0
0	0	0	0
2383	1497	1647	2065
744	250	523	1071
414	784	579	969
1856	1565	1257	2292
99	44	201	570
0	0	0	0
0	0	0	0
0	0	0	0
0	0	0	0
0	0	0	0
378	0	213	318
0	0	0	0
133	60	81	0
119	61	80	56
7960	2295	3632	5214
3643	3529	2049	3982
0	0	0	0
2789	1896	1637	1899
0	0	0	0
0	0	0	0
0	0	0	0
0	0	0	0
0	0	0	0
532	731	840	616
8324	4861	6013	9974
126	358	0	410
0	0	0	0
12956	9437	11350	9097
909	346	90	0
0	0	0	0
0	0	0	0
0	128	0	0
6327	7162	7381	4703
254	33	280	187
13729	11422	13004	21435
0	0	0	0
14479	10285	14294	12272
2159	1216	1051	1221
21444	8599	5178	13563
0	0	0	0
69	80	137	93
0	0	0	0
0	0	0	0
0	0	0	0
0	0	0	0
0	122	165	85
2114	1075	2037	1241
353	158	215	248
0	0	0	0
128	180	282	291
128	56	138	85
417	75	611	352
1982	1379	475	547
734	900	684	973
0	0	0	24
738	544	278	642
1020	0	195	0
0	0	0	0
171	110	0	0
0	0	0	0
2095	1389	3199	1532
1761	1186	1336	1155
430	467	368	254
2006	813	947	1152
0	0	0	0
0	0	0	0
0	0	0	0
110	0	15	0
1403	540	1271	1427
110	80	242	334
0	0	0	0
43	483	298	262
4288	3273	3503	3984
190	560	309	51
140	84	88	114
0	0	0	0
0	0	0	0
2614	2237	2352	1600
0	0	0	0
507	430	138	449
0	0	0	0
185	0	83	211
546	210	580	443
2669	317	1393	991
0	0	0	0
1434	727	346	318
0	0	0	0
0	0	0	0
0	0	0	0
93	707	221	0
74584	51382	48985	80129
456	289	174	63
0	109	33	0
1272	1256	566	1107
0	0	0	0
0	0	0	0
0	0	0	0
7108	2431	2340	4886
23	0	74	0
81	208	104	76
37	16	0	0
423	70	38	0
1112	206	511	274
79	124	290	111
3038	1331	3234	2609
0	0	0	0
1517	710	349	371
0	0	0	0
0	0	0	0
593	296	714	206
2315	445	2958	542
6279	2584	2519	5077
24431	12783	21504	24886
140	0	228	148
0	0	0	0
0	0	0	0
143	0	66	19
0	0	0	0
0	0	0	0
0	0	0	0
2122	1191	755	435
0	0	0	0
112	0	0	258
132	0	0	190
215	263	95	55
0	0	0	0
152	39	18	51
200	291	0	82
0	0	0	0
8064	5952	7128	4276
0	0	0	0
436	635	715	301
6907	4702	5872	9199
0	0	0	0
1058	557	195	298
213	15	0	61
0	0	0	0
378	416	126	499
0	0	0	0
1097	213	603	1139
343	254	134	288
0	0	0	0
0	0	0	0
189	218	153	429
2122	1191	755	435
0	0	0	0
0	0	0	0
699	99	958	310
1750	1133	594	2568
0	0	0	0
0	0	0	0
0	0	0	0
0	0	0	0
298	94	116	523
1008	459	231	679
0	0	0	0
0	0	0	0
756	705	436	453
0	0	0	0
23	73	0	261
0	0	0	0
0	65	104	17
0	0	0	0
0	0	0	0
1110	1104	1835	2323
0	0	0	0
0	0	0	0
0	0	0	0
30	160	0	0
0	0	0	0
434	325	529	644
0	0	0	0
0	0	0	0
536	831	673	821
0	110	0	0
308	0	91	0
0	0	0	0
0	0	0	0
0	0	0	0
0	0	0	0
364	119	215	139
3917	1690	608	1725
547	981	725	728
438	205	341	250
64	69	114	0
0	0	0	0
0	0	0	0
1713	1979	1020	1366
4511	2536	3386	1858
110	172	445	154
0	0	0	0
1614	1242	1063	2293
743	347	690	0
2743	2426	1731	1880
0	0	12	0
62	0	50	44
5586	1125	399	1838
0	0	0	0
220	272	843	1372
0	0	0	0
46	0	0	131
1878	555	1163	1085
0	0	0	0
0	0	0	0
0	0	0	0
0	0	0	0
3294	3087	3858	5090
0	0	0	0
0	0	0	0
0	0	0	0
139	0	113	286
133	319	99	104
593	422	316	996
464	595	699	625
7589	6903	5928	10990
7589	6903	5928	10990
19817	9704	14327	16841
3664	4545	3036	2699
3664	4545	3036	2699
1789	1631	471	1431
1789	1631	471	1431
2200	1167	843	1109
33896	19822	25719	24786
4801	4398	2892	4100
56940	21629	23298	22140
9426	5684	7304	5164
9426	5684	7304	5164
1841	1805	1966	2536
1215	1180	666	639
2549	837	1302	1429
2588	2585	1926	2253
19952	9958	6171	6848
17364	7373	4222	4595
0	0	0	0
4183	1233	723	2788
13411	7757	8325	5943
1505	785	1887	546
11443	8217	7918	4779
9319	6271	5678	7255
20766	13229	9758	11273
262	341	293	184
1324	722	826	1743
15402	8111	7490	9241
3864	2825	3847	3656
0	0	0	0
0	0	0	0
114459	77768	72866	78078
114459	77768	73084	78078
32208	25849	27632	23780
2596	1763	662	720
2596	1763	662	720
29105	20688	13208	28720
12580	6295	9890	15298
263	0	253	126
10793	4695	7765	7814
15402	6421	7270	5080
0	0	0	0
692	208	1212	159
715	214	136	424
21984	12054	12451	14191
3112	1978	1833	1825
4121	4555	5497	4472
4121	4555	5497	4472
4121	4555	5497	4472
6594	2140	3593	3466
1888	1991	2530	1907
2147	1275	1014	0
0	0	0	0
457	316	343	362
594	491	0	557
10663	9442	11494	11281
0	0	0	0
1381	898	1157	1160
2925	1255	1749	1511
0	0	0	0
1267	442	369	133
19642	10459	13838	10732
607	461	304	109
1381	633	919	725
0	0	0	0
10941	7454	5732	10034
3103	1480	3304	1362
709	1050	922	1726
0	0	0	0
41018	29431	26193	31351
0	0	0	0
4722	1451	2975	3188
505	131	749	522
3858	4165	3379	3583
0	0	0	0
285	138	125	123
0	0	0	0
0	0	0	0
5373	1517	2616	1885
105	63	114	77
143	141	198	281
92	216	240	190
0	0	0	0
6928	6119	5356	9098
0	0	0	0
668	225	385	0
630	258	298	1116
3337	1226	2317	2372
902	384	293	359
2214	1814	1053	1745
207	259	88	270
274	70	0	0
3150	2231	2220	2197
0	0	0	0
0	0	0	0
729	44	340	586
0	0	0	0
0	0	0	0
3072	2867	1906	1145
564	1097	1272	616
579	260	824	271
579	260	824	271
0	0	0	0
10167	3961	5208	2906
22252	13065	13020	16021
51151	30127	30119	29839
11713	5708	7344	7015
267	330	326	501
0	0	0	0
2248	615	1413	1449
2879	474	1716	2562
0	0	0	0
0	0	0	0
0	0	0	0
0	0	0	0
79	85	168	0
0	0	0	0
0	0	0	0
414	381	278	556
0	0	0	0
0	0	0	0
0	0	0	0
0	0	35	0
0	0	0	0
379	193	465	75
0	0	128	0
0	0	0	0
335	29	0	11
3766	2945	3775	5234
2505	1465	2487	3357
0	0	0	0
573	0	73	10
0	0	0	0
0	0	0	0
0	0	0	0
2405	960	1768	689
3382	2527	1681	5815
0	0	0	0
0	0	0	0
78	0	137	0
3201	2596	2621	3348
0	0	0	0
0	0	0	0
0	0	0	0
0	0	0	0
0	0	0	0
0	0	0	0
152	0	445	57
0	0	0	0
0	0	0	0
0	0	0	0
0	125	0	0
0	0	0	0
1208	527	575	701
0	0	0	0
0	0	0	0
0	0	0	0
4128	1214	1591	1500
3358	1164	2108	3334
1422	87	210	151
557	137	176	574
0	0	0	0
0	0	0	0
0	0	0	0
0	0	0	0
509	305	597	318
0	0	0	0
0	0	0	0
2315	445	2958	542
945	810	955	612
112	820	508	460
1108	1766	1425	1708
0	0	0	0
8606	3578	4649	3409
0	0	0	0
0	0	0	0
0	0	0	0
11713	5823	7357	7015
11713	5708	7344	7015
1714	1614	535	1397
0	0	0	0
16074	12476	9201	14589
0	0	0	0
0	0	0	0
0	0	0	0
207	141	112	290
13570	9679	9540	10993
0	0	0	0
0	0	0	0
119	71	193	74
0	0	0	0
1865	851	691	422
0	0	0	0
0	0	0	0
0	0	0	0
0	0	0	0
0	0	0	0
1521	1042	1399	386
602	86	750	204
1286	1373	1344	1255
0	0	0	0
0	0	0	0
0	0	0	0
3276	1334	1365	1044
0	0	0	0
0	0	0	0
0	0	0	0
0	0	0	0
35299	29155	29371	35212
0	0	0	0
333	182	522	317
0	0	0	0
0	0	0	0
0	0	0	0
1016	424	593	539
0	0	0	0
0	72	0	0
270	63	0	112
0	0	0	0
401	196	0	137
0	0	0	0
0	0	0	0
0	0	0	0
0	0	0	0
0	0	0	0
0	0	0	0
368	434	112	232
0	0	0	0
3269	2190	1880	1893
560	222	577	200
32	284	206	59
32	284	206	59
1010	1061	232	625
6090	2833	4552	1432
6090	2833	4552	1432
0	0	0	191
323	726	619	355
36	0	0	0
372	435	242	0
0	0	0	0
878	540	1203	1126
2302	1573	1117	1625
9	94	0	9
0	0	0	0
339	209	465	337
24328	13863	14852	11310
0	0	0	0
0	0	0	0
0	0	0	0
0	0	0	0
0	0	0	0
22	124	130	0
564	76	504	291
0	0	0	0
0	77	0	20
2920	1421	1518	2320
1211	1499	422	1551
0	0	0	0
0	0	0	0
210	0	599	131
375	407	870	715
0	0	0	185
0	0	0	0
20787	10014	4987	13343
0	0	0	0
478	85	139	376
0	0	0	0
0	33	45	0
0	0	0	0
719	343	448	654
0	0	0	0
0	0	0	0
0	0	0	0
2515	1178	1245	1503
0	0	0	0
0	0	0	0
0	0	0	0
1940	1450	1629	1964
0	301	91	192
0	0	0	0
0	0	0	0
0	0	0	0
0	0	0	0
0	98	15	51
141	263	131	452
1983	505	740	754
1793	1631	2596	1851
366	205	113	204
14183	3365	9284	3756
3865	1718	1604	1297
109	455	118	0
5918	6549	3971	6707
57	79	0	0
0	53	21	0
0	0	22	0
150	0	174	200
4633	2184	3425	3145
0	0	0	0
2792	1866	3390	1517
278	0	211	304
4386	4187	3199	3334
151	45	54	125
740	411	223	366
0	0	0	0
270	121	220	338
0	0	0	0
0	0	0	0
1020	0	195	0
181	172	517	251
0	0	0	0
0	0	0	0
0	0	0	0
0	287	267	0
9613	7670	6389	8421
844	689	447	652
0	0	0	0
0	0	0	0
0	0	0	0
0	0	0	0
0	0	0	0
54	48	26	70
0	0	0	0
81	55	50	286
294	0	186	398
0	0	0	0
450	0	229	553
668	225	385	0
1761	1186	1336	1155
0	0	0	0
145	100	47	0
0	0	0	0
1504	1326	1223	1804
0	0	0	0
1475	1694	816	1536
0	45	0	0
0	0	0	0
128	38	104	0
0	0	0	0
0	0	0	0
0	0	0	0
420	20	126	41
386	207	266	144
0	0	0	0
224	0	11	52
867	548	427	718
0	0	0	0
0	0	0	0
317	81	184	868
0	0	0	0
0	0	0	0
0	178	23	0
0	0	0	8
0	0	0	0
0	0	0	0
31	9	33	0
0	0	0	0
0	0	0	0
0	0	0	0
45	81	0	0
0	0	0	0
0	0	0	0
648	364	968	656
0	0	0	0
0	0	0	0
324	129	234	404
0	0	0	0
0	0	0	0
1423	1059	1185	829
16	0	0	0
0	0	0	0
46	52	19	97
0	0	0	0
522	307	2717	301
373	92	50	292
0	0	0	0
0	90	242	156
0	0	0	0
0	0	0	0
0	0	0	0
28	0	0	429
0	0	0	0
0	30	0	0
13366	6258	4780	8434
5216	2703	2755	3854
0	0	0	0
87	267	0	0
392	133	118	553
191	275	311	215
0	0	0	0
574	311	501	246
51	61	0	158
0	0	0	0
0	0	0	0
634	318	624	0
0	0	0	0
0	0	0	0
0	0	0	0
0	0	0	0
0	0	0	0
0	0	0	0
0	0	0	0
220	606	233	95
0	0	0	0
0	0	0	0
0	0	0	0
0	0	0	0
0	0	0	0
1638	1878	2721	1110
0	0	0	0
0	0	0	0
0	0	0	0
0	38	34	0
0	0	0	0
0	0	0	0
0	0	0	0
1109	1155	451	1309
9516	5963	9842	9103
17949	10933	15409	15120
9516	5963	9842	9103
2829	2460	2157	2651
1683	836	1252	1275
0	0	0	0
18868	7271	15326	8166
18868	7271	15326	8166
18868	7271	15326	8166
18868	7271	15326	8166
0	0	0	0
0	0	0	0
0	0	0	0
8899	6018	4513	8627
288	145	210	22
652	0	428	235
1032	739	1789	484
0	0	0	0
0	0	0	0
0	0	0	0
1110	443	0	636
170	122	0	0
0	0	0	0
0	0	0	0
16338	7380	9422	12173
4363	2718	2453	4143
0	0	0	0
0	0	0	0
1454	307	3754	301
0	0	0	0
0	0	0	0
0	0	0	0
0	0	0	0
0	0	0	0
131	176	76	44
27448	3450	5624	3291
0	0	0	0
0	0	0	0
190	0	154	0
0	0	0	0
2598	2659	418	739
0	0	0	0
1038	1239	1785	1272
1683	836	1252	1275
0	0	0	0
0	0	0	0
0	0	0	0
0	0	0	0
20590	14185	14051	12537
0	0	0	0
0	0	0	0
205	105	80	147
0	0	0	0
0	0	0	0
20590	14185	14051	12537
20590	14185	14051	12537
20590	14185	14051	12537
0	0	0	0
0	0	0	0
0	0	0	0
0	0	0	0
0	0	0	0
2913	1164	1637	2804
0	0	0	0
59	0	0	74
0	0	0	0
0	0	0	0
0	0	0	0
21755	35562	14016	22735
3297	3428	1398	2300
0	0	0	0
0	0	0	0
0	0	0	0
0	0	0	0
0	0	0	0
0	0	0	0
0	0	0	0
0	0	0	0
68	0	137	0
0	0	0	0
0	0	0	0
641	717	379	764
0	0	0	0
313	156	96	150
0	0	0	0
0	0	0	0
5235	4590	5791	7357
221	413	509	362
172	46	246	0
3686	2131	1981	2809
3686	2131	1981	2809
0	0	0	0
3781	2626	2265	3106
8884	2607	7670	5064
0	0	0	0
3974	3508	2127	4809
391	195	420	174
0	0	0	0
4516	1957	3542	3949
0	0	0	0
0	0	0	0
0	0	0	0
0	0	0	0
0	0	0	0
0	0	0	0
1711	1266	1186	942
0	0	38	115
0	0	0	0
0	0	0	0
2383	1497	1647	2065
0	0	0	0
25	0	0	0
488	365	375	914
0	0	0	0
202	106	137	79
0	0	0	0
30	66	40	57
0	0	0	0
718	91	667	442
718	91	667	442
0	0	0	0
0	0	0	0
0	0	0	0
0	0	0	0
92	59	0	0
0	0	0	0
154	276	304	370
855	1455	857	1686
51	0	31	217
0	0	0	0
0	0	0	0
0	0	0	0
5409	3663	675	3684
0	371	112	129
103	115	144	142
0	0	0	0
0	0	0	0
572	223	1443	4005
385	136	218	306
0	0	0	0
0	0	0	0
4625	2836	2849	1924
4625	2836	2849	1924
0	0	0	0
0	0	0	0
0	0	0	0
0	0	0	0
922	115	466	574
1830	487	710	490
0	0	0	0
0	0	0	0
0	0	0	0
0	0	0	0
0	0	0	0
0	0	0	0
0	0	0	0
0	0	0	0
0	0	0	0
1714	1614	535	1397
0	0	0	0
0	0	0	0
0	0	0	0
0	0	0	0
0	0	0	0
0	0	0	0
0	0	0	0
0	0	0	0
4526	2971	3691	854
0	0	0	0
0	0	0	0
0	0	0	0
1091	445	833	526
0	0	0	0
743	347	690	0
0	0	0	0
0	0	0	0
0	0	0	0
0	0	0	0
0	0	0	0
0	0	0	0
0	0	0	0
0	0	0	0
0	0	0	0
0	0	0	0
0	0	0	0
213	24	303	655
0	0	0	0
0	0	0	0
0	0	0	0
0	0	0	0
0	0	0	0
0	0	0	0
0	0	0	0
0	0	0	0
0	0	0	0
0	0	0	0
0	0	0	0
394	163	0	227
0	0	0	0
295	419	380	184
0	0	0	0
0	0	0	0
0	0	0	0
0	0	0	0
0	0	0	0
0	0	0	0
0	0	0	0
0	0	0	0
0	0	0	0
0	0	0	0
0	0	0	0
3800	2224	4713	4248
0	0	0	0
0	0	0	0
281	183	83	72
1383	324	954	676
776	485	728	1623
0	0	0	0
157	204	185	115
0	0	0	0
0	0	0	0
285	118	232	0
0	0	0	0
0	0	88	0
0	0	0	0
172	441	0	0
0	0	0	0
0	0	0	0
0	0	0	0
2513	656	802	1300
0	0	0	0
3008	2700	1223	564
437	545	1133	292
62	0	269	0
0	0	0	0
0	0	0	0
0	0	0	0
0	0	0	0
3371	3644	4992	2648
0	0	0	0
176	173	0	0
0	0	0	0
0	0	0	0
0	0	0	0
499	171	232	200
445	601	228	373
0	0	0	0
380	614	680	0
0	0	0	0
0	0	0	0
0	0	0	0
0	0	0	0
1500	1239	1122	1321
0	0	0	0
104	0	46	62
1158	1526	1094	2031
0	0	0	0
0	0	0	0
0	0	0	0
670	0	0	0
0	0	0	0
0	0	0	0
0	0	0	0
0	0	0	0
0	0	0	0
0	0	0	0
0	0	0	0
0	0	0	0
2914	4959	3394	3265
0	0	0	0
1039	530	878	725
459	1595	746	483
237	0	325	125
0	0	0	0
0	0	0	0
0	0	0	0
0	0	0	0
0	0	0	0
96	389	39	0
0	0	0	0
0	0	0	0
0	0	0	0
0	0	0	0
0	0	0	0
0	0	0	0
52	24	85	61
0	0	0	0
0	0	0	0
0	0	0	0
0	0	0	0
0	0	0	0
0	0	0	0
0	0	0	0
430	216	516	134
0	0	0	0
1377	1310	816	527
203	109	0	387
0	0	0	0
266	98	0	59
0	0	0	0
0	0	0	0
309	0	70	64
0	0	0	0
422	757	297	1343
0	0	0	0
0	20	0	124
0	0	0	0
0	0	0	0
0	0	0	0
0	0	0	0
0	0	0	0
0	0	0	0
0	0	0	0
0	0	0	0
0	0	0	0
2454	3566	3308	2425
0	0	0	0
0	0	0	0
0	0	0	0
0	0	0	0
0	0	0	0
0	0	0	0
195	128	0	17
0	0	0	0
1187	312	544	1338
0	46	0	0
0	0	0	0
0	0	0	0
0	0	0	0
0	0	0	0
0	0	0	0
0	0	0	0
2000	2102	919	502
1224	545	991	866
0	0	0	0
0	0	0	0
0	0	0	0
0	0	0	0
0	0	0	0
13	29	0	12
1688	508	1109	693
0	0	0	0
0	0	0	0
258	63	401	132
624	904	488	449
0	0	0	0
0	0	0	0
44747	32970	31589	50731
42622	32117	30047	48802
2768	1296	2825	2604
2768	1296	2825	2604
58	222	36	150
0	0	0	0
0	0	0	0
0	0	0	0
0	0	0	0
0	0	0	0
11443	8217	7918	4779
11443	8217	7918	4779
0	0	0	0
0	0	0	0
0	0	0	0
0	0	0	0
0	0	0	0
0	0	0	0
14479	10285	14294	12272
0	0	0	0
3899	2541	4734	4654
0	0	0	0
0	0	0	0
0	0	0	0
0	0	0	0
290	0	19	67
0	0	0	0
0	0	0	0
529	83	288	567
0	0	0	0
0	0	0	0
276	79	414	991
0	0	0	0
313	281	330	648
66992	71561	55458	93662
0	0	0	0
0	0	0	0
1020	0	195	0
0	0	0	0
1020	0	243	0
10952	6751	7023	6813
0	0	0	0
55	60	18	21
0	0	0	0
0	0	0	0
9134	7614	9673	10155
10158	13158	10166	8496
0	0	0	0
819	619	610	728
1100	404	366	1124
1100	404	366	1124
0	0	0	0
20007	13806	9738	18871
260037	201294	193206	223836
424	286	115	232
0	0	0	0
14080	7534	11012	16619
782	724	798	1029
420	0	103	118
2935	683	1517	3989
0	0	0	0
9281	6220	5678	7059
0	0	0	0
4458	2202	3067	4004
0	0	0	0
0	0	0	0
0	0	0	0
81	0	87	252
0	0	0	0
0	0	0	0
0	0	0	0
0	0	0	0
0	0	0	0
0	0	0	0
0	0	0	0
0	0	0	0
0	0	0	0
0	0	0	0
0	0	0	0
172	142	53	181
505	131	749	522
505	131	749	522
386	243	497	614
0	0	0	0
0	0	0	0
0	0	0	0
0	0	0	0
0	0	0	0
0	0	0	0
67	0	108	0
0	0	0	0
1127	1115	690	167
0	0	0	0
191	0	0	0
0	0	0	0
0	155	0	93
2478	1669	2239	1935
0	0	0	0
0	0	0	0
3125	2845	2125	1915
11420	2553	4924	3460
2405	960	1768	689
63738	53113	42280	51479
2666	1196	1329	872
38987	27456	17608	33223
0	0	0	0
6666	4270	5791	3274
0	0	0	0
0	0	0	0
0	0	0	0
935	504	1400	876
0	0	0	0
329	148	0	115
0	0	0	0
0	0	0	0
197	0	204	0
703	769	491	1343
0	156	85	358
2758	2410	1269	3364
518	49	532	191
3420	3355	1751	1982
0	0	0	0
0	0	0	0
0	0	0	0
0	0	0	0
2397	2806	1525	732
120	18	131	169
231	184	167	240
190	190	168	496
8989	7476	2974	5697
7522	4488	5140	6628
30516	14803	14452	15683
0	0	0	0
2029	774	371	570
0	0	0	0
0	0	0	0
8433	4970	5567	6017
3311	2644	1365	2988
0	0	0	0
1669	349	972	1181
0	0	0	0
0	0	0	0
0	0	0	0
0	0	0	0
503	454	345	1305
844	834	1663	1737
44	40	90	63
3420	3355	1751	1982
339	209	465	337
0	0	0	0
0	0	0	0
0	0	0	0
0	0	0	0
0	0	0	0
0	0	0	0
0	0	387	0
0	0	0	0
0	0	0	0
302	90	437	0
547	981	725	728
0	0	0	0
518	294	620	511
0	0	0	0
3439	2900	2734	5082
29	0	140	0
0	0	0	0
0	0	0	0
750	119	108	992
522	117	743	122
0	0	0	0
0	0	0	0
0	0	0	0
0	0	0	0
97	0	131	182
269	564	0	378
18	516	234	505
2577	1037	597	1551
0	0	0	0
828	1007	2192	1093
2122	1069	1865	2604
0	0	0	0
2934	2330	586	2808
0	0	0	0
0	0	0	0
2254	1600	4122	3162
1901	865	1490	867
251	102	148	385
6966	6740	6154	4777
1901	865	1490	867
593	296	714	206
0	0	0	0
0	0	0	0
[truncated: 1,185 more rows]

## Sheet: BACOVA_13days
65540	9454	14749	19197
18864	2376	4447	5970
25735	6878	14149	10631
4374	64	207	1456
34608	2738	4433	6643
13866	591	3484	2335
0	0	0	0
1449	129	333	576
0	0	0	0
609	39	27	41
4387	200	1192	792
0	0	0	0
17913	805	2271	3149
14630	4778	7043	7873
0	0	0	0
181937	18374	44280	42831
48	0	0	0
1032	118	524	284
424	126	99	268
442	0	0	0
0	0	0	0
8819	2407	4828	5345
370	0	208	184
838	27	265	0
6180	780	1374	2458
0	0	0	0
1447	488	1220	531
2246	152	607	1048
1979	348	679	638
687	0	181	0
6450	1459	2536	1297
2865	126	1203	245
2781	110	481	1043
12760	2870	7329	4297
13275	2117	2654	2877
40373	3889	5984	10381
3719	957	1475	1409
36521	1573	1729	2493
1052	0	0	71
36736	3182	5842	6004
389	0	0	52
12564	1649	3194	2847
7652	391	919	1846
27081	4093	5218	5105
0	0	0	0
2032	338	798	828
11405	503	2478	2340
3245	1572	614	869
3357	93	351	578
566	120	164	83
0	0	0	0
2731	229	905	1289
37019	4428	8731	9515
16952	1572	4171	4006
1040	135	631	360
29121	2736	4624	5515
2554	275	723	1024
6581	1365	2478	2563
1249	94	43	213
11913	441	1580	2656
1688	141	337	281
1792	286	440	351
0	0	0	0
1138	2	7	202
0	0	0	0
9052	1270	2082	1293
356	0	0	0
1643	115	242	301
6654	720	3285	1506
5399	270	1066	1015
13355	428	277	4013
2773	380	525	707
432	156	351	199
0	0	0	0
0	0	0	0
223	85	18	0
4488	435	1310	2956
12835	3291	5760	5616
5627	507	803	455
517	12	22	72
8456	1521	3401	2545
11097	1525	3677	3308
6459	616	1590	1955
77997	15443	23587	37003
38621	3974	13534	13126
3397	77	139	606
5246	296	1326	926
1232	312	540	333
371	276	168	0
6182	903	2293	1586
78	0	40	0
4331	922	3860	2479
2226	0	185	448
8224	2201	2271	3404
897	291	532	307
4708	434	1550	1567
0	0	0	0
849	81	174	238
953	142	271	154
565	91	326	223
3677	303	1120	1477
0	0	0	0
4342	47	378	410
324	103	0	0
2484	646	1615	590
729	28	15	33
8928	1256	1540	1960
230	81	0	94
8505	2894	4368	6595
135	45	76	0
5870	596	1578	2122
0	0	0	0
0	0	0	0
28048	3345	9758	7235
201293	57079	78891	59530
1637	874	647	268
576	0	73	111
4768	438	926	709
803	16	10	125
24171	1907	4551	3763
8626	1426	2160	5051
5174	212	1434	657
1961	0	313	207
559	29	235	44
9688	3080	4039	1901
1639	333	433	805
3634	360	1094	641
8124	874	2673	906
1649	23	119	398
1634	41	923	286
634	56	76	473
5015	239	815	1763
405	93	269	144
218	0	101	61
4837	1209	4159	2296
4894	526	683	614
1948	166	45	200
123209	5430	7535	7480
0	0	0	0
4075	572	1241	811
0	0	0	0
12363	995	7643	3474
4570	101	232	1555
16519	2350	6017	5101
399	0	58	21
0	0	0	0
1396	297	932	367
37038	5643	7540	11171
5613	376	344	1152
1458	58	263	266
1246	145	246	557
685	87	182	15
3348	398	510	1388
9747	1243	1698	2270
8617	734	1869	1523
1396	297	932	367
877	21	124	326
2321	275	510	383
1028	0	0	441
0	0	0	0
0	0	0	0
2351	457	1194	453
0	0	0	0
0	0	0	0
7548	1115	1522	1270
8846	995	2730	3726
10003	1156	2369	1634
276	55	17	36
0	0	0	0
8401	537	2076	1329
0	0	0	0
468	44	59	337
0	0	0	0
227	107	168	16
655	111	186	151
0	0	0	0
2480	485	948	962
0	0	0	0
0	0	0	0
6154	683	1216	1279
17624	1366	3967	3632
7723	1521	4919	1937
891	309	184	207
15747	3093	6876	3757
480	15	81	92
0	0	0	0
4707	1277	1520	1361
17413	1285	2609	2748
309	7	189	123
1270	160	146	122
0	0	0	0
646	0	5	0
0	0	0	41
2055	374	143	643
665	225	893	497
801	159	697	327
0	0	0	0
1129	144	493	353
2875	157	446	214
4786	699	1477	837
0	0	0	0
5553	1032	1725	2199
1752	243	306	397
0	0	0	0
7349	973	3376	2238
1723	164	208	427
0	0	0	0
5096	858	1323	573
5978	865	2090	2016
2825	145	312	310
2942	131	557	307
8262	1948	2980	3318
192	38	9	11
1067	531	353	257
4338	360	715	1127
281	0	0	0
2713	1434	1016	713
10565	1936	3488	3005
10004	1421	3922	4615
4458	18	1135	1089
0	0	0	0
0	0	0	0
3963	1825	3924	2515
284	0	0	21
3057	405	1129	410
8954	1001	1368	1417
4579	618	1584	1182
0	0	0	0
0	0	0	0
0	0	0	0
890	100	205	448
146	10	14	51
77	57	13	29
20135	2074	4947	3755
17	0	0	0
207395	18638	48136	48821
5720	608	1296	1048
0	0	0	67
15562	977	5139	2237
931	452	89	1310
591	120	27	0
140	62	0	21
1203	0	102	0
7959	553	1812	1423
7221	674	1682	1057
1895	29	404	149
1145	26	36	68
0	0	0	0
5304	1225	2926	1372
440	81	46	34
2460	35	253	361
13717	1364	4467	2637
0	0	0	0
42569	2885	5467	5672
0	0	0	0
0	0	0	0
17975	2744	7732	4204
17199	2383	5266	4657
1097	76	0	387
1571	334	347	204
1410	30	471	458
30463	2128	7310	5638
6838	787	1767	2095
3716	502	1433	910
4290	842	868	686
10570	1580	5730	3820
4406	449	1151	991
2474	379	337	952
544	0	0	45
467	135	237	80
23028	4796	7354	5402
1054	59	506	228
13485	1946	3312	4155
1331	539	1713	789
0	0	0	0
130599	15136	21582	20611
0	0	0	0
1148	278	371	587
44417	1038	11196	5631
14	0	101	43
511	232	96	0
0	0	0	0
2994	665	1213	880
0	0	0	0
2932	167	548	526
508	0	70	294
3034	282	385	327
1071	103	234	883
0	0	0	0
0	0	0	0
4244	527	1001	1012
4325	270	516	908
803	16	10	125
16569	1614	5882	7582
7365	1324	3366	3720
90	67	107	69
50580	4658	10647	11580
14762	2111	7359	6433
4891	970	1265	1753
2083	450	751	1083
7544	383	589	936
11050	958	3238	2186
11050	958	3238	2186
67798	6109	16023	23294
541	40	233	337
36190	5698	7540	11217
9676	1296	1175	2192
0	0	47	0
444	41	90	68
4677	14	228	486
95837	14483	31622	21364
95	0	25	220
1054	0	186	281
0	0	0	0
3307	499	996	452
2975	933	1678	2236
10884	4828	7067	4244
1312	194	487	412
4111	1496	2901	2624
14529	1834	2598	2410
245	46	436	0
8117	1125	2409	1131
511	232	96	0
268	21	269	53
16202	466	297	1251
2685	408	0	703
0	0	0	0
0	0	0	0
9154	778	2525	1984
4097	169	648	175
955	143	406	561
9625	2355	4161	3027
12853	2300	2025	1880
1811	131	135	0
1080	356	488	525
3796	637	799	894
934	157	389	196
0	0	0	0
1171	232	114	390
4674	224	1191	732
645	293	345	281
2973	864	817	666
191	0	43	0
87	0	0	0
66	0	0	25
2940	358	1222	1002
1000	126	776	258
871	192	33	248
304	197	260	169
78	7	30	15
4337	33	214	835
610	81	19	126
460	54	119	110
149	2	0	1
65	0	182	75
8302	1553	2863	2552
0	0	0	0
3512	355	499	519
980	131	179	0
1837	200	393	389
0	0	0	0
1090	403	523	533
487	13	61	93
590	59	304	349
0	0	0	0
72241	9719	19314	15357
0	0	0	0
297	139	306	57
10197	2952	5555	3009
0	0	0	0
3741	692	1435	1728
49	0	0	5
2035	198	321	495
8077	676	1436	1434
8243	2664	2848	1368
187	40	272	82
724	167	111	557
16	0	0	0
107	93	55	0
481	0	0	145
444	7	52	27
8440	1765	5277	3491
205	0	0	53
4866	207	247	480
7937	1747	3591	3941
631	0	214	420
2939	325	372	647
2724	157	670	371
1411	244	733	390
5749	698	1006	1076
1432	589	836	889
1432	589	836	889
487	72	0	165
6444	528	1052	1759
1285	108	642	504
45408	8727	19729	14629
0	0	0	0
0	0	0	0
0	0	0	0
124	0	42	0
890	118	161	180
5439	881	310	1325
0	0	0	0
0	0	0	0
2865	126	1203	245
2185	541	518	688
54620	17538	26743	26416
1203	154	173	151
8456	1521	3401	2545
2273	100	341	44
4025	270	516	780
0	0	0	0
586	0	0	0
13023	2693	3764	3164
5035	92	225	416
0	0	0	0
0	0	0	0
2437	913	1070	531
546	32	3	60
1150	452	276	686
0	0	0	0
1873	292	458	1004
928	0	0	149
941	17	389	0
620	55	199	452
291	0	22	49
2685	386	440	648
8574	1607	2330	3062
246	0	0	0
0	0	0	0
1009	393	310	429
16237	3964	6143	3958
278	42	204	86
3596	470	1156	1065
0	0	0	0
3333	804	697	837
3487	137	497	1590
482	67	31	58
0	0	0	0
1069	117	285	196
660	129	37	37
0	0	0	0
606	261	292	367
450	0	0	0
1067	174	423	398
511	0	37	140
0	0	0	0
426	56	356	38
982	0	255	308
465	151	413	165
0	0	0	0
17833	615	1856	1265
2175	495	1622	502
37738	2793	9383	9408
0	0	0	0
0	0	0	0
420	227	330	220
8097	1112	1655	1503
20892	3061	4567	3746
2000	319	145	256
867	159	81	783
15	0	31	0
544	110	84	89
6520	885	4237	529
1083	39	288	54
964	70	240	327
2817	338	813	691
11836	505	1921	1564
286	0	0	0
0	0	0	0
993	308	362	318
0	0	0	0
0	0	0	0
0	0	0	0
152	0	0	0
8870	1665	3118	2975
1156	134	147	111
448	0	130	300
0	0	0	0
3312	860	2243	1306
140	0	0	2
190	0	0	16
3234	251	1231	443
18557	1973	5154	6608
223	0	91	34
0	0	0	0
2844	310	270	408
450	0	0	28
5035	92	225	416
165	0	0	0
611	0	166	212
462	14	0	0
328	0	67	250
0	0	0	0
123	126	16	71
10406	1550	5551	3747
513	93	101	18
126	0	0	0
221	82	169	42
448	56	278	191
558	51	699	141
0	0	0	0
0	51	0	26
564	0	266	327
1582	886	353	443
0	0	0	0
251	0	0	11
2680	540	1021	330
1042	24	143	405
6271	295	1428	2546
521	0	106	0
4017	434	593	1116
0	0	0	0
1068	325	559	348
0	0	0	0
993	60	140	282
0	0	0	0
884	0	0	82
262	0	0	0
161	20	82	89
1248	68	355	507
568	225	269	232
1703	7	67	488
3700	1371	850	662
1634	389	385	256
1191	0	563	489
4614	982	1665	686
2476	392	238	944
0	0	0	0
668	280	255	513
837	138	335	252
0	0	0	0
2324	132	337	206
292	29	0	89
0	0	0	0
0	0	0	0
37688	2763	3841	7390
231	0	235	0
3363	879	1020	811
1171	653	595	980
0	0	0	0
0	0	0	0
1788	513	547	483
6412	712	2935	1030
0	0	0	0
10184	2741	6056	2910
69	0	42	53
196	0	31	58
24603	2282	4559	6790
0	0	0	0
5389	563	1222	1129
0	0	0	0
0	0	0	0
6634	551	882	1292
0	0	70	0
135	0	76	69
0	0	0	0
2713	1434	1016	713
2710	520	1319	645
9308	2436	2976	3069
0	0	0	0
0	0	0	0
7759	446	875	1122
4325	640	1472	1454
4470	2468	1767	1625
0	0	0	0
1225	22	106	255
0	0	0	0
0	0	0	0
2151	430	302	570
9319	940	3233	2254
2446	436	161	607
7374	293	1380	1098
20	0	41	46
0	0	0	0
617	11	72	44
0	0	0	0
0	0	0	0
58	0	20	0
0	0	0	0
7871	1624	1503	2143
14580	2736	3427	4892
0	0	0	0
7585	1808	2745	2406
1055	0	247	136
0	0	0	0
0	0	0	0
4070	208	341	451
318	0	0	118
0	0	0	0
5800	100	1546	884
1925	385	761	743
191	34	75	92
0	0	0	0
0	0	0	0
1436	161	165	146
0	0	0	0
848	60	22	65
5011	661	937	1405
0	0	0	0
2804	221	337	344
0	0	0	0
0	0	0	0
123209	5430	7535	7480
2048	677	1388	629
1120	21	560	134
141	0	0	18
886	45	47	188
886	45	47	188
955	68	323	352
578	54	330	111
464	8	11	103
502	36	350	320
156	0	0	60
20660	1910	5768	4328
1224	163	288	381
1238	117	274	272
0	0	0	0
179	6	0	0
303	16	20	0
1747	0	0	141
800	137	0	233
226	0	0	35
13109	1916	4309	3807
0	0	0	0
190	0	0	0
5356	806	1407	1427
6399	1597	1963	520
5322	571	1178	861
141	0	0	0
8224	2201	2271	3404
92	68	47	83
55028	4644	11908	8930
273	0	76	133
1224	537	287	120
0	0	0	0
155	103	105	159
462	0	210	179
151	52	0	0
162	0	0	0
2616	232	1140	670
12309	1756	6952	4095
8070	369	893	1874
0	0	0	0
2466	286	965	1773
4020	212	832	1260
255	83	146	98
205	0	58	87
198	0	0	35
0	0	0	0
3026	1495	1133	764
575	53	281	168
0	0	0	0
13326	2446	5922	3318
0	0	0	0
2921	172	888	208
1827	287	497	553
0	0	0	0
0	0	0	0
16	4	0	3
319	0	0	0
616	61	0	251
2355	152	309	415
9	0	27	0
0	0	150	26
1827	287	497	553
10826	2468	3624	5120
353	0	94	143
123209	5430	7535	7480
190	59	0	24
2744	6	96	409
1203	0	102	0
4553	1862	2020	2464
99	15	285	182
8495	2662	3795	2000
0	0	0	0
3745	850	801	1271
11	0	0	0
5262	345	1249	1467
2004	15	0	31
0	0	0	0
806	212	409	309
48	0	0	0
3250	540	729	604
0	0	0	0
1733	405	604	608
1550	947	762	428
1537	328	1024	491
978	272	479	809
528	565	983	831
0	0	0	0
0	0	0	0
73	33	74	11
0	0	0	0
0	0	0	0
1740	205	496	1043
7599	57	2047	1892
0	0	52	0
631	0	214	420
883	248	362	325
933	160	146	331
271	113	0	26
0	0	0	0
14976	2406	7638	3074
0	0	0	0
1081	103	171	484
0	0	0	0
1355	316	513	224
1413	271	583	505
302	0	273	0
0	0	0	0
108	0	69	62
2552	368	706	486
1361	244	456	372
272	62	85	273
1938	353	1136	1152
256	121	189	125
0	0	0	0
0	0	0	0
1260	465	424	440
8817	88	2024	1847
0	0	0	0
395	168	172	87
158	0	54	0
121	17	0	114
141	0	0	81
425	99	81	143
1097	0	248	168
0	0	0	0
815	0	188	247
179	0	112	90
77997	15443	23587	37003
3583	668	519	1310
97	0	0	0
27	0	0	5
0	0	0	0
58141	6044	14047	9333
0	0	0	0
611	65	124	268
243	0	263	62
0	0	0	0
0	0	0	0
1109	20	483	385
0	0	0	0
0	0	0	0
2287	16	0	451
1137	242	395	335
0	0	0	0
0	0	0	0
0	0	0	0
295	60	62	0
4983	474	796	636
6223	1324	3209	2016
0	0	0	0
370	0	88	142
0	0	0	0
214	0	28	57
42092	7155	19115	13760
619	94	143	108
0	0	0	0
0	0	0	0
7601	870	2704	3031
79	39	27	80
0	0	0	0
38	0	0	51
0	0	0	0
0	0	0	0
0	0	0	0
2631	128	142	662
412	0	228	86
361	0	49	111
92	0	0	0
0	0	0	0
223	0	24	9
1676	117	220	727
0	0	0	0
354	16	90	0
425	0	216	1012
1570	92	42	444
6483	670	2278	2436
0	0	0	0
0	0	0	0
167	0	191	16
0	0	0	0
1809	93	683	751
0	0	0	0
0	0	0	0
0	0	0	0
0	0	0	0
0	0	0	0
369	0	225	136
0	0	0	0
0	0	0	0
0	0	0	0
0	0	0	0
295	0	346	105
10917	1255	2303	2007
118	0	19	126
173	43	157	90
0	0	0	0
58	0	76	25
0	0	0	0
156	87	672	143
0	0	0	0
3839	1879	2453	1600
0	0	0	0
0	0	0	0
240	32	0	0
13275	1589	3659	3488
0	0	0	0
1730	166	410	260
0	0	0	0
0	0	0	0
4921	345	1180	1176
0	0	0	0
0	0	72	243
0	0	0	0
0	0	0	0
135	0	0	96
91	0	0	84
0	0	0	0
33425	1936	6635	2885
237	190	278	224
18334	2283	3412	3490
28	0	0	0
464	14	79	45
0	0	260	0
1154	328	614	0
752	175	526	0
0	0	0	0
5312	230	1883	1802
3235	707	790	966
1503	71	654	311
176	174	535	494
521	0	112	73
0	0	0	0
0	0	0	0
58	0	0	0
0	0	0	0
0	0	0	0
1141	13	205	169
0	0	0	0
442	0	0	0
182	0	98	74
9617	813	2567	1703
6900	2501	3949	4724
0	0	0	0
0	114	0	55
21	54	21	40
0	0	0	0
0	0	0	0
0	0	0	0
0	0	0	0
1305	12	267	666
10490	2047	4338	4463
122	0	23	86
0	0	0	0
27674	5535	8514	6636
772	170	116	703
0	0	0	0
0	0	0	0
593	193	151	456
4355	1115	1596	1809
451	14	57	87
788	586	1049	355
0	0	0	0
30056	564	4004	3403
5309	548	975	1102
54620	17538	26743	26416
0	0	0	0
93	0	24	16
0	85	0	0
221	0	0	0
0	0	0	0
0	0	0	0
196	0	27	30
153419	49268	63183	47899
14921	1266	1673	1592
0	0	0	0
739	183	39	73
1270	0	266	148
609	32	0	284
3764	997	1329	1112
669	69	944	186
88	0	56	8
109	0	97	145
5046	1946	2659	2344
0	0	0	0
617	94	128	58
0	0	0	0
10802	1971	7282	6344
968	22	676	337
1784	333	582	721
2083	450	751	1083
0	0	0	24
3986	401	164	290
0	0	0	0
210	0	19	176
1380	124	804	590
586	0	0	0
1135	0	565	0
1050	199	273	309
8577	316	1865	1704
904	125	560	370
906	37	83	127
0	0	0	0
0	0	0	0
1584	243	517	1052
0	0	0	0
1639	218	357	472
0	0	0	0
367	0	41	332
390	153	330	59
1261	78	797	325
0	0	0	0
730	117	33	82
0	0	0	0
0	494	0	0
0	0	0	0
892	130	312	30
229450	22004	55632	53941
974	124	42	353
170	58	126	262
3631	792	1181	570
329	0	0	0
0	0	0	0
0	0	0	0
7513	1383	506	1658
0	0	0	0
120	0	0	185
266	0	19	29
0	0	103	100
1559	118	727	305
440	76	209	0
4366	746	1107	923
0	0	0	0
3975	133	874	908
0	0	21	0
0	0	0	0
321	222	23	0
3034	188	0	712
2721	1184	1240	1308
10949	315	1230	2415
55	27	0	14
0	0	0	0
0	0	0	0
634	63	107	325
0	0	0	0
0	0	0	0
673	144	26	149
2203	358	980	952
0	0	0	0
245	87	95	125
178	0	45	23
122	151	0	0
0	0	0	0
203	0	11	173
655	124	124	432
0	0	0	0
13937	1358	3027	3984
0	0	0	0
269	0	45	51
12448	4922	9160	7960
47	0	0	36
1352	36	84	223
0	38	0	0
0	0	0	0
906	185	235	409
110	0	0	0
1589	96	426	78
3812	97	455	530
0	0	0	0
0	0	0	0
764	63	144	217
2474	358	1440	952
0	0	0	0
0	0	0	0
3012	199	544	323
14514	2540	6585	5775
0	0	0	0
0	0	0	0
0	0	0	0
0	0	53	0
809	0	88	283
723	0	90	125
0	0	0	0
0	0	0	0
1955	368	1028	526
278	8	43	33
349	179	232	74
0	0	0	0
268	14	194	29
0	0	0	0
0	0	0	0
2283	458	743	194
0	0	0	0
0	0	0	0
0	0	0	0
835	0	471	404
0	0	0	0
1577	140	305	951
0	0	0	0
0	0	0	0
1289	19	0	39
1315	16	43	570
203	0	103	45
0	0	0	0
0	0	0	0
0	0	0	0
0	0	0	0
480	77	122	211
2940	98	336	397
1376	479	416	584
278	0	0	49
324	156	49	12
0	0	0	0
102	0	0	0
5422	419	1163	2379
8328	920	1569	2731
28	0	58	66
0	0	0	0
5372	1269	2409	1114
2411	145	1566	657
4880	474	778	424
0	0	0	0
647	0	229	435
1273	147	288	282
0	0	0	0
4148	276	1726	1412
0	0	0	0
242	0	0	0
2773	380	525	720
0	0	0	0
0	0	0	0
0	0	0	0
0	0	0	0
2713	1434	1016	713
0	0	0	0
0	0	0	0
0	0	0	0
663	429	556	221
92	0	0	0
1740	205	496	1043
1216	138	1123	853
10884	4828	7067	4244
10884	4828	7067	4244
15821	1053	2759	2085
4786	699	1477	837
4786	699	1477	837
1129	144	493	353
1129	144	493	353
2986	576	1516	677
56624	5193	13581	11345
11682	1680	4017	3885
8819	2407	4828	5345
18096	2750	7902	6944
10747	1777	4526	4706
10004	1421	3922	4615
8401	537	2076	1329
4768	438	926	709
2562	50	426	361
30091	1986	6472	2596
27529	1936	6046	2235
0	0	0	0
17913	805	2271	3149
6450	1459	2536	1297
5817	487	564	1277
16237	3964	6143	3958
7788	710	468	2829
38621	3974	13534	13126
4488	435	1310	2956
154	78	50	85
21738	4817	6616	4956
6154	683	1216	1279
0	0	0	0
0	0	0	0
80323	14267	28399	19000
97291	14516	30803	21182
8117	1125	2409	1131
606	261	292	367
606	261	292	367
20958	2810	10216	8051
51991	7203	9798	14891
1788	513	547	483
3426	110	596	893
12363	995	7643	3474
0	0	0	0
1876	232	589	725
273	0	76	133
18771	5936	11400	9393
2484	985	760	702
17413	1285	2609	2748
17413	1285	2609	2748
17413	1285	2609	2748
5553	1032	1725	2199
1080	356	488	525
0	0	0	55
0	0	0	0
2226	0	185	448
1490	110	401	265
7723	1521	4919	1937
3607	1302	2911	1792
7418	935	1470	2106
2680	540	1021	330
0	0	0	0
2797	164	673	424
8243	2664	2848	1368
329	19	231	194
2446	436	161	607
0	0	0	0
13301	2111	3007	5887
9235	1384	1381	2165
1156	134	147	111
1811	131	135	0
13193	2784	5895	4020
0	0	0	0
6804	615	1855	1589
667	331	362	239
6581	1365	2478	2563
0	0	0	0
341	101	92	262
1422	101	1308	260
0	0	0	0
4929	1014	1383	2199
423	121	264	0
2242	152	309	415
1667	51	159	215
0	0	0	0
8891	329	3592	4962
0	0	0	0
310	63	944	194
11135	2835	9091	3562
4666	422	552	1767
623	192	596	288
2087	1181	1087	737
673	139	418	316
3432	304	872	1380
2476	298	840	699
0	0	0	0
0	0	0	0
273	272	52	341
0	0	0	0
0	0	0	0
1789	65	967	248
5035	175	225	416
1203	0	102	0
1203	0	102	0
0	0	0	0
19537	3799	6025	4526
36536	2763	4450	6615
87116	7421	15097	18195
7650	1285	3863	2644
0	0	0	0
782	33	204	120
3622	542	185	216
1753	593	982	153
1267	0	0	104
5414	1510	1474	520
0	0	0	0
0	0	0	0
1236	87	498	484
0	0	0	0
0	0	0	0
748	0	79	25
0	0	0	0
0	0	0	0
0	0	0	0
0	0	0	0
0	0	0	0
0	0	0	0
563	0	43	0
0	0	0	0
150	73	60	88
4885	1097	2840	3400
3146	450	1629	1719
0	0	0	0
3134	398	855	734
0	0	0	0
0	0	0	0
0	0	0	0
3378	516	1266	922
6703	426	1831	3131
0	0	0	0
0	0	0	0
54	40	16	52
2171	209	1110	1441
0	0	41	0
0	0	0	0
0	0	0	0
79	0	0	24
0	0	0	0
653	15	121	30
1555	0	0	232
170	0	86	0
0	0	0	0
0	0	0	0
1619	334	1102	432
0	0	0	0
2617	378	850	665
0	0	0	0
0	0	0	0
0	0	0	0
15747	3093	6876	3757
4361	525	220	1430
302	0	273	0
837	138	335	252
0	0	0	0
0	0	0	0
0	0	0	0
0	0	0	0
212	58	89	108
0	0	0	0
0	0	0	0
3034	188	0	712
1067	531	353	257
389	0	0	52
4020	212	832	1260
0	0	0	0
5456	1388	2498	1042
0	0	0	0
0	0	0	0
0	0	0	0
7907	1359	4061	2928
7650	1285	3863	2644
4097	169	648	175
0	0	0	0
26504	3073	6173	9043
0	0	0	0
171	0	0	0
0	0	8	12
748	186	272	252
27788	1892	3701	2806
0	0	0	0
0	0	0	0
171	381	521	98
0	0	0	0
5965	232	554	672
0	0	0	0
0	0	0	0
0	0	0	0
0	0	0	0
0	0	0	0
5454	918	1826	2129
397	0	126	0
4852	1789	2624	2275
0	0	0	0
0	0	0	0
0	0	0	0
1116	105	691	462
0	0	0	0
0	0	0	0
0	0	0	0
0	0	0	0
20077	2159	6826	4247
0	0	0	0
363	49	0	203
0	0	0	0
0	0	0	0
0	0	0	0
879	89	83	240
1761	0	526	178
40	89	0	0
271	0	95	48
1046	131	381	261
322	0	0	0
0	0	0	0
0	0	0	0
0	0	0	0
0	0	0	0
0	0	0	0
0	0	0	0
301	74	25	76
0	0	0	0
2222	526	2295	463
1458	58	263	266
1184	98	0	151
1184	98	0	151
2563	689	841	530
11836	505	1921	1564
11836	505	1921	1564
1028	0	0	441
1716	335	407	496
36	0	0	0
617	172	628	188
0	0	0	0
2148	91	898	457
573	0	109	261
840	0	366	360
0	0	0	0
816	164	358	389
42512	3156	7585	9332
3504	643	1171	737
0	0	0	0
0	0	0	0
0	0	0	0
0	0	0	0
1698	542	512	280
2203	370	416	360
0	0	0	0
357	0	34	0
998	52	1916	299
1862	232	114	390
295	110	393	14
0	0	0	0
839	271	260	196
3338	268	841	383
20	0	0	60
0	0	0	0
17692	687	1086	1313
0	0	0	0
1362	15	490	257
0	0	0	0
0	0	0	0
0	0	0	0
3389	1254	1533	1059
0	0	0	0
0	0	0	0
64	0	0	0
568	225	269	232
0	0	0	0
0	0	0	0
0	0	0	0
3900	0	739	1182
928	0	39	89
0	0	0	0
0	0	0	0
0	0	0	0
151	0	0	0
0	70	0	0
5114	191	700	1432
1634	41	923	286
5399	270	1066	1015
2324	132	337	206
17624	1366	3967	3632
4321	778	1656	636
376	308	726	809
12760	2870	7329	4297
81	0	0	23
322	47	45	28
23	0	0	0
1931	512	857	886
3542	729	1303	730
0	0	0	0
8224	336	1050	1423
164	51	56	33
10013	1381	1463	1911
174	26	18	13
638	96	158	274
0	0	0	0
842	244	1094	683
0	0	0	0
0	0	0	0
5046	1946	2659	2344
860	0	369	313
0	0	0	0
0	0	0	0
0	0	0	0
259	0	61	136
9958	1032	2480	2247
830	195	412	330
0	0	0	0
0	0	0	0
0	0	0	0
0	0	0	0
125	0	0	21
223	0	175	87
0	0	0	0
465	0	215	81
645	0	34	0
0	0	0	0
1147	416	568	452
310	63	944	194
968	22	676	337
0	0	0	0
203	0	11	22
0	0	0	0
2657	122	724	694
0	0	0	0
4112	569	761	1457
52	0	0	0
0	0	0	0
0	0	0	0
0	0	0	0
0	0	0	0
0	0	0	0
734	119	233	247
329	250	167	258
0	0	0	0
0	0	192	100
152	9	12	84
0	0	0	0
0	0	0	0
618	20	27	268
0	0	0	0
0	0	0	0
761	196	1164	430
19	0	0	0
0	0	0	0
0	0	0	0
106	24	0	0
0	0	0	0
0	0	0	0
3281	230	725	1278
16	0	32	0
0	0	0	0
0	0	0	0
1185	118	655	514
0	0	0	0
0	0	0	0
3097	194	759	573
0	0	0	0
0	0	0	0
2999	153	161	725
0	0	0	0
45	0	127	14
12	0	0	37
0	0	0	0
289	475	52	152
801	272	197	185
0	0	0	0
2220	294	118	673
0	0	0	0
0	0	0	0
9	34	0	28
459	0	0	127
0	0	0	0
0	0	0	0
51599	11316	14973	18127
1439	24	143	122
2706	173	344	520
17	104	20	13
694	38	79	0
369	157	147	71
0	0	0	0
101	14	19	117
0	0	72	0
0	0	0	0
0	0	0	0
306	11	280	259
483	0	223	0
483	0	223	0
0	0	0	0
0	0	0	0
0	0	0	0
0	0	0	0
0	0	0	132
175	91	106	174
0	0	0	0
0	0	0	0
0	0	0	0
0	0	0	0
0	0	0	271
1957	1142	1989	619
0	0	0	0
0	0	0	0
0	0	0	0
0	0	0	0
0	0	0	0
0	0	0	0
0	0	0	0
1170	188	47	458
11405	503	2478	2340
27692	2864	6000	7371
11405	503	2478	2340
2352	343	281	708
1948	166	45	200
0	0	0	0
42569	2885	5467	5672
42628	2885	5467	5672
42569	2885	5467	5672
42569	2885	5467	5672
0	0	0	0
0	0	0	0
0	0	0	0
13320	1448	2491	2702
36	27	36	0
1856	116	87	658
16177	2452	4985	4463
0	0	0	0
0	0	0	0
0	0	0	0
0	0	0	0
176	0	143	0
0	0	0	0
0	0	0	0
21042	3407	6558	4806
6965	370	1390	2043
0	0	0	0
0	0	0	0
156409	50309	63393	48782
0	0	0	0
0	0	0	56
0	0	0	0
0	0	0	0
0	0	0	0
245	51	0	105
123209	5430	7535	7480
92	69	0	0
0	0	0	0
366	0	34	26
0	0	0	0
15440	1509	3326	3218
47	47	128	0
3738	913	840	1144
1948	166	45	200
0	0	0	0
0	0	0	0
137	0	0	0
177	0	60	130
44417	1038	11196	5631
0	0	0	0
0	0	0	0
403	0	87	66
0	0	0	0
0	0	0	0
44417	1038	11196	5631
44417	1038	11196	5631
44417	1038	11196	5631
0	0	0	0
0	0	0	0
0	0	0	0
0	0	0	0
0	0	0	0
5704	877	572	2206
0	0	0	0
427	242	83	62
0	0	0	0
158	0	40	30
0	0	0	0
0	0	0	0
5416	201	381	331
405	321	412	83
0	0	0	0
0	0	0	0
0	0	0	0
0	0	0	0
0	0	0	0
0	0	0	0
0	0	0	0
0	0	0	0
0	0	0	0
0	0	0	0
103	0	0	0
0	0	0	0
267	5	22	55
0	0	0	0
452	0	50	15
11657	1932	4636	2627
420	227	330	220
837	255	290	209
2453	101	618	208
2453	101	618	208
0	0	0	0
4134	405	1172	452
16569	1614	5882	7582
0	0	0	0
3060	332	1153	1056
1054	0	186	281
0	0	0	0
4244	527	1001	1012
1191	0	563	489
0	0	0	0
0	0	0	0
0	0	0	0
0	0	0	0
21	0	22	11
2936	324	590	1493
454	6	129	78
0	0	0	0
0	0	0	0
5312	230	1883	1802
0	0	0	0
140	0	0	13
747	0	0	177
280	0	292	298
187	14	0	72
0	0	0	0
2880	49	370	575
0	0	0	0
2903	261	656	535
2903	261	656	535
0	0	0	0
0	0	0	0
0	0	0	0
0	0	0	0
0	0	0	0
0	0	0	0
0	0	0	0
3973	353	416	1729
452	96	0	25
0	0	0	0
0	0	0	0
0	0	0	0
6393	761	2597	1399
0	0	0	0
99	0	138	0
508	15	83	8
0	0	0	0
7871	1624	1503	2143
202	47	0	136
0	0	0	0
0	0	0	0
6663	528	1063	1568
6663	528	1063	1568
0	0	0	0
0	0	0	0
0	0	0	0
857	0	0	0
3616	155	888	735
4944	0	690	1527
0	0	0	0
0	0	0	0
0	0	0	0
0	0	0	0
0	0	0	0
0	0	0	0
189	0	4	74
0	0	0	0
0	0	0	0
4097	169	648	175
0	0	0	0
0	0	0	0
0	0	0	0
0	0	0	0
0	0	0	0
0	0	0	0
0	0	0	0
0	0	0	0
2868	482	1154	249
0	0	0	0
0	0	0	0
0	0	0	0
1634	0	72	218
0	0	0	0
2411	145	1566	657
23	0	0	0
9	0	0	0
0	0	0	0
0	0	0	0
0	0	0	0
0	0	0	0
473	248	339	135
0	0	0	0
0	0	0	0
0	0	0	0
0	0	0	0
696	62	561	191
0	0	0	0
0	0	0	0
0	0	0	0
0	0	0	0
0	0	0	0
0	0	0	0
0	0	0	0
68	76	0	0
0	0	0	0
0	0	0	0
0	0	0	0
2705	281	607	338
0	0	0	0
102	0	52	0
0	0	0	0
0	0	0	0
0	0	0	0
0	0	0	0
467	81	285	108
0	0	0	0
0	0	0	0
0	0	0	0
0	0	0	0
0	0	0	0
0	0	0	0
7600	866	5203	3950
0	0	0	0
0	0	0	0
0	0	188	20
1062	163	1142	1247
2006	331	687	1036
0	0	0	0
490	94	461	223
0	0	0	0
0	0	0	0
3146	0	0	508
51	0	52	0
360	46	522	0
0	0	0	0
1556	190	389	196
0	0	0	0
0	0	0	0
0	0	0	0
4160	254	1156	903
5076	1081	1808	1463
3569	863	1814	925
3661	142	927	789
18889	1946	3422	5434
0	0	0	0
0	0	0	0
0	0	0	0
0	0	0	0
7585	1808	2745	2406
0	0	0	0
16	0	0	0
0	0	0	0
0	0	0	0
0	0	0	0
806	212	409	309
3470	697	574	989
0	0	0	0
0	0	0	0
0	0	0	0
12835	3291	5760	5616
0	0	0	0
0	0	0	0
2025	718	665	670
0	0	0	0
102	0	0	16
3326	228	790	786
0	0	0	0
0	0	0	0
423	86	58	0
0	0	0	0
0	0	0	0
1100	133	332	411
0	0	0	0
0	0	0	0
0	0	0	0
0	0	0	0
0	0	0	0
440	27	241	56
13495	1128	6044	3602
0	0	0	0
0	0	0	0
486	271	1296	559
583	0	78	0
0	0	0	0
0	0	0	0
0	0	0	0
0	0	0	0
0	0	0	0
3547	780	305	921
153	25	17	170
0	0	0	0
429	17	0	291
0	0	0	0
0	0	0	0
0	0	0	0
109	0	0	63
0	0	0	0
0	0	0	0
0	0	0	65
0	0	0	0
0	0	0	0
0	0	0	0
0	0	0	0
9713	1262	2814	1537
0	0	0	0
1145	174	478	46
575	0	179	39
0	0	0	0
470	48	0	47
0	0	0	0
0	0	0	0
606	159	272	123
0	0	0	0
225	42	0	86
0	12	51	0
0	0	0	0
0	0	0	0
0	0	0	0
0	0	0	0
0	0	0	0
215	160	170	37
0	0	0	0
0	0	0	0
0	0	0	0
0	0	0	0
10429	841	4245	1073
0	0	0	0
0	0	0	0
0	0	0	0
0	0	0	0
0	0	0	0
0	0	0	0
218	29	380	239
0	0	0	0
958	94	266	104
0	0	0	0
0	0	0	0
0	0	0	0
0	0	0	0
0	0	0	0
0	0	0	0
0	0	0	0
1489	199	380	610
14769	647	920	4090
0	0	0	0
0	0	0	0
0	0	0	0
0	0	0	0
0	0	0	0
0	0	0	0
23073	3660	8171	5004
0	0	0	0
797	0	109	528
1097	0	248	168
448	56	278	191
0	0	0	0
797	0	109	528
160366	15817	39137	37260
149842	14623	35773	34722
6964	942	2749	1238
6964	942	2749	1238
196	0	31	58
0	0	0	0
0	0	0	0
206	0	57	0
0	0	0	0
400	0	0	0
16237	3964	6143	3958
16237	3964	6143	3958
0	0	0	0
0	0	0	0
129	0	0	124
0	0	0	0
0	0	0	0
0	0	0	0
30056	564	4004	3403
0	0	0	0
0	0	0	0
0	0	0	0
0	0	0	0
6002	1972	3522	3159
0	0	0	0
2014	152	513	692
0	0	0	0
81	0	0	0
3075	413	366	985
0	0	0	0
0	0	0	0
5117	33	685	885
0	0	0	0
702	141	482	205
8911	909	3110	2583
0	0	0	0
0	0	0	0
5046	1946	2659	2344
0	0	0	0
5354	1946	2722	2462
11912	676	2385	736
0	0	0	0
269	0	0	9
0	0	0	0
0	0	0	0
13109	1916	4309	3807
11721	1438	3122	2210
10019	177	2085	1682
2219	0	816	129
1661	386	264	718
1661	386	264	718
218	0	0	101
9457	3359	4590	3793
520398	55108	122462	120242
3599	573	574	474
0	0	0	0
54016	7921	10463	15561
1675	19	276	126
158	205	160	121
0	0	0	30
0	0	0	0
7651	710	388	2784
0	0	0	0
6960	1056	1924	2202
450	0	0	0
0	0	0	0
97	0	0	27
0	0	0	0
591	0	0	0
591	0	0	0
0	0	0	0
0	0	0	0
0	0	0	0
1422	101	1308	260
0	0	0	0
218	29	380	316
0	0	0	0
0	0	0	0
0	0	0	0
320	66	333	360
667	331	362	239
667	331	362	239
1779	138	706	679
0	0	0	0
176	0	20	0
0	0	0	0
0	0	0	0
0	0	0	0
0	0	0	0
1155	66	408	170
0	0	0	0
981	85	347	567
0	0	0	0
1534	537	282	416
0	0	0	0
380	19	52	0
2287	0	944	384
0	0	0	0
0	0	0	0
12876	1985	3855	3781
15828	3662	5505	3352
3378	516	1266	922
113501	11494	24073	17728
4070	208	341	451
45429	5800	13901	13026
0	0	0	0
8495	2662	3795	2000
0	0	0	0
0	0	0	0
0	0	0	0
31462	2745	4660	11160
0	0	0	0
213	127	87	426
0	0	0	0
319	0	0	0
93	28	38	0
0	0	0	0
6271	295	1428	2546
3836	0	1867	1900
1083	39	288	54
2466	709	1170	1641
0	0	0	0
0	0	0	0
0	0	0	0
0	0	0	0
2692	93	1845	1442
271	0	21	0
887	191	326	110
55	0	0	28
324	103	0	0
11906	2843	3813	3340
31740	4564	8307	6556
0	0	0	0
1260	465	424	440
0	0	0	0
1377	246	81	397
15869	2273	3441	4788
3277	1270	1603	948
0	0	0	0
4894	526	683	614
0	0	0	0
2565	0	217	492
2565	0	217	492
0	0	0	0
2426	138	756	583
3671	301	240	660
0	0	0	0
2466	709	1170	1641
816	164	358	389
0	0	0	0
0	0	0	0
0	0	0	0
0	0	0	0
0	0	0	0
0	0	0	0
0	0	0	0
0	0	0	192
33	0	0	0
627	181	0	187
1376	479	416	584
0	0	0	0
3819	905	1898	893
404	0	0	0
13977	699	1051	2658
2156	132	0	292
0	0	0	0
356	0	0	0
1747	0	0	141
0	0	0	0
0	0	0	0
0	0	0	0
0	0	0	0
0	0	0	0
0	255	70	0
186	0	237	0
2257	1301	1950	2051
3960	140	77	89
0	0	0	0
2083	619	172	444
2367	514	593	1086
0	0	0	0
5454	761	2504	1399
3986	401	164	290
0	0	0	0
4232	614	785	1341
4299	94	154	598
1320	16	111	1286
5174	212	1434	657
4299	94	154	598
321	222	23	0
0	0	0	0
0	0	0	0
[truncated: 1,185 more rows]

## Sheet: BACOVA_15days
2647	889	5662	4353
322	319	530	949
1212	740	1879	1652
93	73	448	75
2509	545	2791	2382
542	0	344	101
0	0	0	0
56	0	91	37
0	0	0	0
126	0	0	41
214	0	0	84
0	0	0	0
0	0	331	229
1077	178	1447	1525
0	0	0	0
6057	1842	7663	4289
0	0	0	12
41	18	44	35
108	86	113	155
0	0	0	0
0	0	0	0
502	234	753	728
0	0	0	0
0	0	0	0
269	100	568	377
0	0	0	0
188	50	131	77
530	281	466	724
169	73	96	105
0	39	0	0
579	49	253	48
0	193	70	50
0	0	207	115
428	148	1694	1435
416	22	577	442
1728	985	3554	2862
78	0	192	86
262	0	165	259
0	29	0	74
507	103	877	1114
0	0	113	0
834	302	973	499
227	102	263	140
706	215	66	207
0	0	0	0
130	0	169	18
575	103	553	663
0	114	76	531
120	0	377	0
0	0	0	21
0	0	0	0
36	0	19	146
1434	99	720	307
614	604	367	597
49	20	78	61
304	178	600	231
0	12	120	172
844	218	950	756
0	0	69	49
39	26	196	214
0	0	45	6
0	22	32	40
0	0	0	0
0	10	18	21
0	0	0	0
0	193	70	140
0	0	0	0
0	36	0	0
219	136	615	211
151	108	217	150
738	609	715	357
136	9	476	55
24	0	0	10
0	0	0	0
0	0	0	0
0	0	0	0
31	55	494	180
1430	610	1976	1657
0	0	0	22
0	0	7	5
165	71	314	219
220	280	362	108
99	80	315	635
3413	652	12052	4261
2937	1903	5545	3093
164	26	34	0
136	68	224	71
67	53	140	44
0	0	83	0
862	289	706	538
0	59	0	0
143	171	451	381
0	0	0	0
544	302	598	507
259	167	85	80
86	68	247	175
0	0	0	0
15	2	36	0
9	0	36	7
335	0	122	36
334	0	281	274
0	0	0	0
40	0	51	190
0	0	0	0
62	41	197	121
11	0	0	6
174	36	359	339
13	0	41	11
771	215	1341	711
14	0	0	0
127	61	182	214
0	0	0	0
0	0	0	0
883	601	2125	1470
35060	11614	45555	31306
29	0	131	96
0	0	0	1
0	72	124	0
0	0	0	0
344	0	929	847
449	25	740	210
156	0	125	243
0	0	0	150
0	0	0	0
300	116	269	403
112	0	78	91
204	19	311	77
506	0	118	90
15	0	15	133
79	54	77	0
53	0	19	0
45	15	428	127
0	0	0	37
0	0	99	0
113	330	436	434
0	27	81	111
107	0	0	29
653	0	342	0
0	0	0	0
180	17	162	92
0	0	0	0
243	241	446	149
66	0	147	203
556	74	571	668
1	0	9	0
0	0	0	0
76	0	0	0
2626	468	3172	1537
133	0	0	397
0	0	54	87
0	29	23	54
43	0	18	0
64	0	168	78
61	49	238	241
422	0	0	0
76	0	0	0
14	0	28	0
0	0	24	19
0	0	0	0
0	0	0	0
0	0	0	0
101	20	133	104
0	0	0	0
0	0	0	0
0	0	83	37
426	55	671	332
228	34	692	302
0	0	0	0
0	0	0	0
367	0	160	275
0	0	0	0
0	0	0	0
0	0	0	0
0	0	0	0
0	0	33	29
0	0	0	0
458	125	528	372
0	0	0	0
0	0	0	0
502	111	343	207
55	130	172	45
455	413	750	479
0	0	0	0
1057	319	1492	1583
38	30	0	0
0	0	0	0
53	0	554	606
221	232	447	273
38	0	0	0
9	4	61	0
0	0	0	0
0	0	0	0
0	0	0	0
53	0	84	0
48	19	40	119
0	0	14	29
0	0	0	0
0	44	65	25
91	0	60	71
122	0	98	224
0	0	0	0
1016	201	298	333
73	0	66	72
0	0	0	0
269	76	383	393
98	0	41	64
0	0	0	0
61	36	64	75
139	67	321	45
62	0	78	41
75	0	132	148
752	213	1027	847
9	4	2	0
46	0	0	38
0	0	42	0
0	0	0	0
68	0	71	56
607	140	967	567
214	483	1234	732
23	55	168	119
0	0	0	0
0	0	0	0
437	123	220	190
0	0	0	0
78	0	65	181
400	41	497	370
64	0	371	528
0	0	0	0
0	0	0	20
0	0	0	0
0	0	0	0
0	0	0	0
0	0	0	0
473	221	740	369
0	0	0	0
7072	1931	8898	4460
13	55	285	60
0	0	0	0
129	147	275	777
0	0	0	0
78	0	0	0
0	0	0	0
0	0	100	196
121	0	155	149
164	18	525	79
58	4	51	33
0	0	0	14
0	0	0	0
264	76	411	406
2	4	5	0
0	33	25	0
477	0	984	602
0	0	0	0
820	0	545	605
0	0	0	0
0	0	0	0
797	299	1805	1233
755	140	1154	896
44	35	17	36
15	36	0	12
0	0	17	13
926	287	920	451
39	160	408	302
0	0	100	217
360	0	716	47
551	389	836	1063
161	0	246	64
73	0	0	0
0	0	3	0
0	0	0	61
676	158	1212	344
0	29	19	33
802	87	1135	415
64	51	17	66
0	75	0	0
2581	2550	4327	3853
0	0	0	0
72	0	61	145
512	0	1397	797
0	0	0	0
0	0	0	41
0	0	0	0
136	79	120	0
0	0	0	0
161	0	90	0
0	0	0	36
0	0	47	37
0	0	46	0
0	0	0	0
0	0	0	0
34	0	154	0
242	0	215	0
0	0	0	0
646	296	556	50
330	412	544	579
0	0	0	0
1070	143	2146	1582
1754	506	2278	1925
452	247	475	394
192	0	0	0
63	46	274	100
65	103	68	424
65	103	68	424
1779	560	4427	2945
0	0	0	21
2626	468	3172	1537
20	16	291	176
15	0	0	0
21	0	155	35
43	52	273	70
3908	735	5899	2819
0	0	0	0
44	23	15	0
0	0	0	0
0	29	73	0
205	0	458	457
1025	213	1140	990
22	0	89	56
308	154	82	414
428	0	1660	456
29	0	92	72
326	0	930	285
0	0	0	41
69	0	13	0
119	0	0	0
0	0	61	0
0	0	0	0
0	0	0	0
208	43	86	263
130	69	46	0
0	23	188	0
641	36	481	275
188	58	220	250
0	0	44	0
63	0	110	71
29	7	0	47
73	0	0	0
0	0	0	0
37	0	117	122
198	0	162	91
0	0	53	37
175	0	70	156
0	0	21	50
0	0	0	0
0	0	0	0
263	0	276	215
18	78	74	244
0	0	0	0
0	0	0	0
0	0	29	15
0	0	17	0
0	21	27	50
6	0	43	34
0	0	0	0
15	0	65	0
177	0	742	97
0	0	0	0
13	12	0	194
0	0	0	118
0	0	0	121
0	0	0	0
90	0	95	176
6	0	0	0
108	0	0	0
0	0	0	0
4268	1303	3217	2817
0	0	0	0
0	0	25	0
1215	83	1466	850
0	0	0	0
253	89	81	341
0	0	0	0
0	0	96	70
260	0	196	50
443	0	889	602
0	0	0	0
21	139	181	90
0	0	0	0
0	0	0	0
0	0	42	0
9	0	9	10
278	88	586	91
0	0	55	0
33	0	139	0
360	273	674	173
0	0	0	0
0	0	117	154
419	0	176	0
109	0	49	38
153	83	226	86
0	0	213	71
0	0	213	71
0	0	0	0
0	74	54	86
70	74	122	38
2013	376	1970	2702
0	0	0	0
0	0	0	0
0	0	0	0
0	0	0	0
61	24	32	0
167	0	117	0
0	0	0	0
0	0	0	0
0	193	70	50
34	68	162	0
5051	949	12938	2003
18	0	66	0
165	71	314	219
41	0	129	67
242	0	181	0
0	0	0	0
0	0	0	0
0	0	661	598
152	0	0	97
0	0	0	0
0	0	0	0
142	0	262	140
0	10	0	5
56	164	99	251
0	0	0	0
235	66	262	113
0	0	0	0
0	0	0	0
0	0	25	0
0	0	0	0
55	0	101	45
293	197	575	509
0	0	0	0
0	0	0	0
92	28	56	0
1031	831	998	130
0	8	33	26
184	0	141	102
0	0	0	0
31	73	71	75
960	143	611	491
0	0	0	0
0	0	0	0
49	0	153	40
15	0	40	0
0	0	0	0
0	0	32	50
0	0	0	0
74	0	0	0
104	0	0	0
0	0	0	0
24	0	0	0
0	13	0	0
52	0	81	11
0	0	0	0
225	0	0	102
152	0	67	26
438	202	1033	752
0	0	0	0
0	0	0	0
55	0	0	75
335	135	495	165
552	305	640	291
45	0	48	0
174	36	47	0
0	0	0	0
0	12	16	0
0	45	164	43
0	0	0	22
90	0	0	37
0	49	32	0
432	0	113	71
0	0	29	91
0	0	0	0
0	31	0	32
0	0	0	0
0	0	0	0
0	0	0	0
0	0	0	0
225	25	876	97
0	27	0	0
0	0	19	0
0	0	0	0
911	38	1006	587
0	0	0	4
0	0	0	0
93	74	147	57
943	193	1537	1127
0	0	0	0
0	0	0	0
0	0	0	0
8	0	0	0
152	0	0	97
0	0	33	0
0	0	0	0
18	7	0	0
0	0	0	0
0	0	0	0
0	0	0	0
551	389	836	1055
0	0	24	0
24	19	0	0
0	0	0	0
0	0	0	58
0	78	78	27
0	0	0	0
0	0	0	0
0	0	0	0
31	0	142	51
0	0	0	0
0	0	0	0
319	0	168	0
10	0	0	0
206	109	252	253
0	0	35	0
23	0	49	76
0	0	0	0
93	61	113	88
0	0	0	0
0	0	206	14
0	0	0	0
29	0	0	0
0	0	0	0
26	0	54	42
53	0	92	0
0	0	0	89
0	0	47	0
270	0	73	0
22	0	66	36
26	168	166	22
80	43	141	44
112	22	410	91
0	0	0	0
279	0	0	65
88	0	53	62
0	0	0	0
0	0	11	15
0	0	0	0
0	0	0	0
0	0	0	0
818	287	1523	1013
0	0	0	0
176	35	702	120
0	0	0	0
0	0	0	0
0	0	0	0
51	56	102	28
444	0	571	575
0	0	0	0
455	582	825	479
13	0	0	0
0	0	0	0
887	604	1035	672
0	0	0	0
85	0	134	244
0	0	0	0
0	0	0	0
35	22	136	34
0	0	0	0
0	0	0	0
0	0	0	0
68	0	71	56
224	0	328	69
524	267	450	451
0	0	0	0
0	0	0	0
62	175	0	0
504	187	669	378
325	58	229	179
0	0	0	0
0	78	0	0
0	0	0	0
0	0	0	0
106	0	74	261
731	853	1925	780
49	23	0	80
188	149	0	103
0	0	0	0
0	0	0	0
0	0	0	0
0	0	0	0
0	0	0	0
0	0	0	0
0	0	0	0
243	155	306	80
740	391	1551	1214
0	0	0	0
392	123	216	84
19	0	0	15
0	0	0	0
0	0	0	0
107	0	0	0
0	0	0	0
0	0	0	0
267	25	281	261
124	0	0	77
0	0	0	0
0	0	0	0
0	0	0	0
0	0	0	21
0	0	0	0
41	0	0	0
270	126	83	86
0	0	0	0
13	0	45	153
0	0	0	0
0	0	0	0
653	0	342	0
130	0	228	356
27	22	0	0
0	0	0	0
0	0	0	0
0	0	0	0
0	0	91	0
34	0	0	42
43	17	67	44
96	0	67	26
25	0	0	0
174	155	434	83
30	0	78	119
0	73	61	0
0	0	0	0
0	0	0	0
0	0	0	0
0	0	0	0
0	0	127	0
0	0	0	71
684	161	1796	748
0	0	0	0
0	0	0	0
458	99	131	245
336	90	0	87
130	0	99	161
0	0	0	0
544	302	598	507
0	0	0	0
879	218	1023	1710
0	0	25	0
0	24	63	0
0	0	0	0
0	39	0	0
52	0	27	64
0	0	0	0
0	0	0	15
0	0	0	146
118	94	341	80
67	0	282	268
0	0	0	0
147	19	154	201
62	0	97	329
30	0	48	0
0	0	14	0
0	0	60	0
0	0	0	0
68	0	71	56
0	0	13	33
0	0	0	0
475	444	186	843
0	0	0	0
64	0	199	528
0	0	180	0
0	0	0	0
0	0	0	0
0	0	0	0
0	0	0	0
102	0	108	0
10	8	146	77
0	0	0	0
0	0	0	0
0	0	180	0
390	122	485	722
0	0	0	0
653	0	342	0
0	0	0	25
0	0	0	0
0	0	100	196
218	41	384	354
0	0	20	31
129	0	74	207
0	0	0	0
226	0	276	0
0	0	0	0
108	0	190	48
0	0	41	0
0	0	0	0
0	0	0	56
0	0	0	12
22	51	34	209
0	0	0	0
189	0	25	19
108	0	207	66
88	0	73	0
0	0	298	0
220	174	23	36
0	0	0	0
0	0	0	0
0	0	0	0
0	0	0	0
0	0	0	0
101	0	191	124
311	84	382	174
0	0	0	0
0	0	0	0
74	26	56	107
68	0	0	0
0	0	0	66
0	0	0	0
165	116	478	262
0	0	0	0
110	0	82	39
0	0	0	0
51	0	27	21
0	21	64	109
0	0	0	0
0	0	0	0
0	0	0	0
84	4	142	76
115	0	0	71
0	0	21	0
359	168	211	508
0	0	0	0
0	0	0	0
0	0	0	0
298	0	166	41
64	0	276	255
0	0	0	0
0	29	0	29
0	0	0	0
0	0	0	0
0	0	0	0
0	0	53	21
0	0	0	0
0	0	0	0
260	17	0	96
0	0	0	0
3413	652	12052	4261
112	0	0	54
0	0	0	0
0	0	7	0
0	0	0	0
1324	325	1115	2214
0	0	0	0
0	0	0	0
15	0	65	88
0	0	0	0
0	0	0	0
201	0	211	124
0	0	0	0
0	0	0	0
31	0	185	51
53	0	31	18
0	0	0	0
0	0	0	0
0	0	0	0
0	0	41	8
155	0	119	133
508	223	698	674
0	0	0	0
23	0	56	122
0	0	0	0
0	0	0	0
2009	262	1894	2171
0	11	14	33
0	0	0	0
0	0	0	0
233	174	194	475
0	0	13	0
0	0	0	0
0	0	0	0
0	0	0	0
0	0	0	0
0	0	0	0
0	0	123	56
0	0	37	0
23	0	24	0
0	0	0	0
0	0	0	0
0	0	0	0
113	45	237	139
0	0	0	0
0	0	0	0
0	0	0	0
0	52	41	32
327	79	576	111
0	0	0	0
0	0	0	0
0	0	21	0
0	0	0	0
192	0	0	23
0	0	0	0
0	0	0	0
0	0	0	0
0	0	0	0
0	0	0	0
0	3	30	3
0	0	0	0
0	0	0	0
0	0	0	0
0	0	0	0
0	0	23	0
106	0	422	44
9	28	18	28
0	0	0	0
0	0	0	0
0	0	0	0
0	0	0	0
0	0	0	122
0	0	0	0
210	42	549	42
0	0	0	0
0	0	0	0
0	32	57	11
272	88	412	748
0	0	0	0
40	0	0	0
0	0	0	0
0	0	0	0
0	0	0	145
0	0	0	0
0	80	0	0
0	0	0	0
0	0	0	0
0	0	0	0
0	55	0	0
0	0	0	0
113	190	1304	494
35	28	109	0
562	183	1345	1258
0	0	0	0
0	0	19	0
26	0	0	0
194	154	34	0
0	71	0	0
0	0	0	0
471	0	680	241
21	0	389	52
0	0	0	22
0	0	0	91
0	96	0	0
0	0	0	0
0	0	0	0
0	0	0	0
0	0	0	0
0	0	0	0
64	25	52	79
0	0	0	0
0	0	0	0
0	0	9	0
412	149	328	172
380	364	348	636
0	0	0	0
0	0	0	0
0	0	0	8
0	0	0	0
0	0	0	0
0	0	0	0
0	0	0	0
0	0	98	13
653	122	761	602
0	0	0	0
0	0	0	0
2683	190	1616	1408
55	0	0	0
0	0	0	0
0	0	0	0
0	0	74	87
409	0	429	279
0	0	0	0
287	41	136	212
0	0	0	0
144	57	258	178
103	0	317	195
5051	949	12938	2003
0	0	0	0
0	0	0	0
0	0	0	0
0	0	0	0
0	0	0	0
0	0	0	0
0	0	0	0
33049	10174	42302	29609
252	29	722	263
0	0	0	0
0	0	0	0
28	66	0	0
0	82	0	0
213	48	255	75
106	0	0	44
0	0	16	0
0	0	0	0
416	0	561	0
0	0	0	0
0	0	51	0
0	0	0	0
1754	506	2278	1864
0	92	61	0
98	71	26	73
192	0	0	0
0	0	0	0
154	0	216	126
0	0	0	0
0	0	0	0
67	0	153	0
0	0	0	0
0	0	0	0
0	17	22	0
247	9	403	101
0	0	24	132
40	0	0	0
0	0	0	0
0	0	0	0
35	0	80	114
0	0	0	0
28	0	0	0
0	0	0	0
0	0	0	0
31	0	33	13
51	0	0	0
0	0	0	0
75	0	0	37
0	0	0	0
0	0	0	0
0	0	0	0
0	0	0	61
7978	2050	9766	5061
53	0	223	0
0	0	16	0
0	24	323	76
0	0	0	0
0	0	0	0
0	0	0	0
213	0	165	0
0	0	0	0
0	0	0	0
73	0	0	0
0	0	0	45
51	0	0	21
0	0	0	0
72	57	75	117
0	0	0	0
68	0	0	28
0	0	0	0
0	0	0	0
22	0	0	0
0	0	169	66
130	94	133	170
252	0	726	142
17	14	0	14
0	0	0	0
0	0	0	0
0	0	0	17
0	0	0	0
0	0	0	0
37	10	52	71
263	0	276	215
0	0	0	0
11	0	0	9
42	0	0	0
19	0	0	0
0	0	0	0
0	0	0	0
72	127	167	48
0	0	0	0
618	79	933	686
0	0	0	0
0	0	0	0
1233	452	1911	1588
0	0	0	0
20	0	83	16
0	0	0	0
0	0	0	0
102	67	36	42
0	0	0	0
0	0	0	83
71	0	19	29
0	0	0	0
0	0	0	0
0	0	0	0
263	0	276	215
0	0	0	0
0	0	0	0
0	0	88	90
171	0	634	358
0	0	0	0
0	0	0	0
0	0	0	0
0	0	0	0
14	0	246	45
0	0	0	0
0	0	0	0
0	0	0	0
62	33	147	185
0	0	0	0
23	27	12	19
0	0	0	0
0	0	0	0
0	0	0	0
0	0	0	0
440	161	736	220
0	0	0	0
0	0	0	0
0	0	0	0
0	0	0	0
0	0	0	0
0	0	150	117
0	0	0	0
0	0	0	0
0	0	101	99
0	0	0	33
0	0	0	0
0	0	0	0
0	0	0	0
0	0	0	0
0	0	0	0
33	0	155	0
0	0	66	31
28	22	0	0
0	0	0	33
0	0	0	25
0	0	0	0
0	0	15	0
101	80	387	69
0	117	52	362
0	0	0	0
0	0	0	0
60	0	90	174
0	0	0	0
122	0	85	133
0	0	0	0
31	0	24	0
27	0	85	22
0	0	0	0
135	0	113	88
0	0	0	0
0	0	0	0
147	13	476	64
0	0	0	0
0	0	0	0
0	0	0	0
0	0	0	0
68	0	71	56
0	0	0	0
0	0	0	0
0	0	0	0
192	0	231	23
0	0	0	0
101	0	191	124
106	14	204	72
1025	213	1140	990
1025	213	1140	990
576	0	279	447
122	0	98	224
122	0	98	224
0	44	65	25
0	44	65	25
117	95	121	151
1327	436	1662	1629
300	343	446	108
502	234	753	728
917	555	1022	1121
648	479	639	728
214	483	1234	732
367	0	160	275
0	72	124	0
21	0	111	150
98	190	1316	415
77	190	1205	265
0	0	0	0
0	0	331	229
579	49	253	48
192	0	252	158
1031	831	998	130
273	15	668	75
2937	1903	5545	3093
31	55	494	180
0	0	49	0
708	236	1226	1120
502	111	343	207
0	0	0	0
0	0	0	0
3274	685	4547	2196
3274	810	4706	2370
326	0	930	285
0	0	32	50
0	0	32	50
811	1007	1412	1825
1784	694	4639	4028
51	56	102	28
74	0	269	0
243	241	446	149
0	0	0	0
150	15	20	31
0	0	25	0
1102	653	1476	1382
63	0	209	51
221	232	447	273
221	232	447	273
221	232	447	273
1016	201	298	333
63	0	110	71
0	0	0	0
0	75	0	0
0	0	0	0
0	37	25	0
455	413	750	479
253	0	265	166
256	0	344	69
319	0	168	0
0	0	0	0
140	0	0	58
443	0	889	602
0	0	25	0
49	23	0	80
0	0	0	0
745	169	1054	867
671	0	252	276
0	27	0	0
0	0	44	0
441	302	2021	1405
0	0	0	0
307	0	184	467
0	0	44	0
844	218	950	756
0	0	0	0
0	0	68	53
215	171	407	318
0	0	0	0
947	201	298	310
0	0	49	38
10	8	146	77
18	0	42	36
0	0	0	0
105	0	608	129
0	0	0	0
0	0	56	44
1330	535	1251	605
0	0	242	115
112	0	0	37
88	0	179	88
0	0	37	0
39	62	245	128
0	0	401	0
0	0	0	0
0	0	0	0
16	0	17	0
0	0	0	0
0	0	0	0
52	0	142	69
152	0	0	97
0	0	100	196
0	0	100	196
0	0	0	0
463	214	1060	322
212	115	1047	480
1282	258	3193	2062
118	51	290	0
0	0	0	0
21	0	0	17
16	0	0	0
190	38	0	234
0	0	0	53
277	0	0	76
0	0	0	0
0	0	0	0
89	0	23	0
0	0	0	0
0	0	0	0
0	0	14	0
0	0	0	0
0	0	0	0
0	0	0	0
0	0	0	0
0	0	0	0
0	0	0	0
0	0	0	0
0	0	0	0
0	0	0	15
417	119	902	240
202	46	515	165
0	0	0	0
73	0	0	90
0	0	0	0
0	0	0	0
0	0	0	0
0	0	0	0
91	0	331	50
0	0	0	0
0	0	0	0
51	0	27	53
246	9	197	184
0	0	0	0
0	0	0	0
0	0	0	0
0	36	0	0
0	0	0	0
0	0	40	0
0	24	0	0
0	0	0	0
0	0	0	0
0	0	0	0
66	0	70	0
0	0	0	0
171	68	221	47
0	0	0	0
0	0	0	0
0	0	0	0
1057	319	1492	1583
113	45	298	139
0	0	0	0
88	0	53	62
0	0	0	0
0	0	0	0
0	0	0	0
0	0	0	0
0	0	0	0
0	0	0	0
0	0	0	0
0	0	169	66
46	0	0	38
0	0	113	0
62	0	97	329
0	0	0	0
515	0	120	47
0	0	0	0
0	0	0	0
0	0	0	0
118	51	290	0
118	51	290	0
130	69	46	0
0	0	0	0
1138	327	1755	1052
0	0	0	0
0	0	0	0
0	0	0	0
31	0	0	0
477	214	186	259
0	0	0	0
0	0	0	0
0	65	171	0
0	0	0	0
25	0	0	0
0	0	0	0
0	0	0	0
0	0	0	0
0	0	0	0
0	0	0	0
244	0	171	420
0	38	25	0
317	150	414	381
0	0	0	0
0	0	0	0
0	0	0	0
101	0	106	138
0	0	0	0
0	0	0	0
0	0	0	0
0	0	0	0
299	231	485	1095
0	0	0	0
0	0	0	0
0	0	0	0
0	0	0	0
0	0	0	0
0	21	59	12
0	117	155	167
0	0	0	0
0	0	42	0
0	0	168	66
102	0	108	0
0	0	0	0
0	0	0	0
0	0	0	0
0	0	0	0
0	0	0	0
0	0	0	0
0	0	0	0
0	0	0	0
0	0	233	0
0	0	54	87
0	0	66	0
0	0	66	0
75	0	39	154
432	0	113	71
432	0	113	71
0	0	0	0
90	38	233	234
0	0	0	0
0	0	52	50
0	0	0	0
0	0	0	0
0	0	0	0
0	0	98	0
0	0	0	0
21	17	0	17
896	143	1731	1540
0	0	240	38
0	0	0	0
0	0	0	0
0	0	0	0
0	0	0	0
214	92	0	394
28	22	0	46
0	0	0	0
0	0	0	0
0	0	0	26
37	0	255	122
18	0	0	14
0	0	0	0
0	0	0	0
93	0	0	48
0	0	0	0
0	0	0	0
41	32	342	200
0	0	0	0
38	15	0	31
0	0	0	0
0	0	0	0
0	0	0	0
226	45	138	162
0	0	0	0
0	0	0	0
0	0	64	0
0	0	0	89
0	0	0	0
0	0	0	0
0	0	0	0
0	0	33	76
0	0	0	0
0	0	0	0
0	0	0	0
0	0	0	0
0	0	30	0
0	0	0	15
52	0	180	63
79	54	77	0
151	108	217	150
0	0	11	15
55	130	172	45
208	0	44	204
0	0	0	88
428	148	1694	1435
30	0	0	48
9	0	9	0
0	0	46	0
42	168	289	87
29	23	58	336
0	0	0	0
129	147	142	0
7	0	14	0
266	0	325	399
0	0	17	27
0	0	0	0
0	0	0	0
89	18	94	256
0	0	0	0
0	0	0	0
416	0	561	0
52	62	220	86
0	0	0	0
0	0	0	0
0	0	0	0
0	0	131	167
236	122	375	409
48	54	0	37
42	0	0	0
0	0	0	0
0	0	0	0
0	0	0	0
0	0	0	0
0	0	31	0
0	0	0	0
0	16	0	0
0	0	0	0
0	0	0	0
0	0	59	0
0	0	56	44
0	92	61	0
0	0	0	0
14	0	0	0
0	0	0	0
131	0	164	0
0	0	0	0
57	206	295	75
0	0	0	0
0	0	0	0
0	0	0	0
0	0	0	0
0	0	0	0
0	0	0	0
0	0	92	18
0	0	0	41
0	0	0	0
0	33	44	0
6	0	12	0
0	0	0	0
0	0	0	0
0	0	0	0
0	0	0	0
0	0	0	0
0	0	146	0
0	0	0	0
0	0	0	0
0	0	0	0
10	0	0	0
0	0	0	0
0	0	0	0
68	0	333	56
0	0	0	0
0	0	0	0
0	0	0	0
70	74	122	38
0	0	0	0
0	0	0	0
107	57	411	490
0	0	0	0
0	0	0	0
32	39	104	100
0	0	0	0
0	0	0	0
0	0	0	0
0	0	0	0
0	0	0	0
84	0	109	86
0	0	0	0
164	0	279	62
0	0	0	0
0	0	0	0
0	0	0	0
0	0	0	0
0	0	0	0
0	0	0	0
2049	600	3730	2298
80	0	84	0
121	80	190	50
0	0	0	0
25	0	0	0
0	0	0	41
0	0	0	0
0	0	0	0
0	0	0	0
0	0	0	0
0	0	0	0
0	0	0	0
0	0	46	0
0	0	46	0
0	0	0	0
0	0	0	0
0	0	0	0
0	0	0	0
0	0	0	0
0	0	35	27
0	0	0	0
0	0	0	0
0	0	0	0
0	0	0	0
0	0	0	0
73	29	154	0
0	0	0	0
0	0	0	0
0	0	0	0
0	0	0	0
0	0	0	0
0	0	0	0
0	0	0	0
44	0	0	18
575	103	553	663
2316	667	3411	2019
575	103	553	663
264	0	0	108
107	0	0	29
0	0	0	0
820	0	545	605
820	22	545	605
820	0	545	605
820	0	545	605
0	0	0	0
0	0	0	0
0	0	0	0
319	126	574	960
0	0	0	0
0	59	0	0
728	19	510	444
0	0	0	0
0	0	0	0
0	0	0	0
0	0	0	0
0	0	0	0
0	0	0	0
0	0	0	0
370	0	1166	674
544	134	1146	824
0	0	0	0
0	0	0	0
33146	10204	42469	29852
0	0	0	0
0	0	0	0
0	0	0	0
0	0	0	0
0	0	0	0
9	0	0	8
653	0	342	0
0	0	0	0
0	0	0	0
0	0	0	0
0	0	0	0
253	73	512	294
0	0	16	0
185	75	0	82
107	0	0	29
0	0	0	0
0	0	0	0
0	0	0	0
14	0	15	12
512	0	1397	797
0	0	0	0
0	0	0	0
124	0	22	0
0	0	0	0
0	0	0	0
512	0	1397	797
512	0	1397	797
512	0	1397	797
0	0	0	0
0	0	0	0
0	0	0	0
0	0	0	0
0	0	0	0
210	44	56	67
0	0	0	0
0	0	0	0
0	0	0	0
0	0	0	0
0	0	0	0
0	0	0	0
0	0	161	376
52	0	0	21
0	0	0	0
0	0	0	0
0	0	0	0
0	0	0	0
0	0	0	0
0	0	0	0
0	0	0	0
0	0	0	0
0	0	0	0
0	0	0	0
0	0	0	0
0	0	0	0
0	0	14	0
0	0	0	0
0	45	10	0
652	144	894	297
55	0	0	75
34	40	141	56
64	0	135	528
64	0	135	528
0	0	0	0
64	0	180	528
646	296	556	50
0	0	0	0
33	0	413	27
44	23	15	0
0	0	0	0
34	0	154	0
26	168	166	22
0	0	0	0
0	0	0	0
0	0	0	0
0	0	0	0
0	0	14	17
629	198	397	592
7	0	0	0
0	0	0	0
0	0	0	0
471	0	680	241
0	0	0	0
0	0	0	7
55	0	0	67
313	26	110	0
0	0	0	0
0	0	0	0
0	0	0	0
0	0	0	0
0	59	165	0
0	59	165	0
0	0	0	0
0	0	0	0
0	0	0	0
0	0	0	0
0	0	0	0
0	0	0	0
0	0	0	0
260	0	364	0
0	0	0	0
0	0	0	0
0	0	0	0
0	0	0	0
645	245	322	680
0	0	0	0
0	0	117	57
10	0	10	48
0	0	0	0
243	155	306	80
0	19	0	30
0	0	0	0
0	0	0	0
78	0	246	192
78	0	246	192
0	0	0	0
0	0	0	0
0	0	0	0
0	38	0	0
0	32	200	195
0	0	0	53
0	0	0	0
0	0	0	0
0	0	0	0
0	0	0	0
0	0	0	0
0	0	0	0
8	0	0	19
0	0	0	0
0	0	0	0
130	69	46	0
0	0	0	0
0	0	0	0
0	0	0	0
0	0	0	0
51	0	0	0
0	0	0	0
0	0	0	0
0	0	0	0
35	0	68	79
0	0	0	0
0	0	0	0
0	0	0	0
0	0	89	56
0	0	0	0
0	0	0	0
0	0	0	0
0	0	0	0
0	0	0	0
0	0	0	0
0	0	0	0
0	0	0	0
84	13	18	14
0	0	0	0
0	0	0	0
0	0	0	0
0	0	0	0
26	10	0	0
0	0	0	0
0	0	0	0
0	0	0	0
0	0	0	0
0	0	0	0
0	0	0	0
0	0	0	0
0	77	0	0
0	0	0	0
0	0	0	0
0	0	0	0
60	0	63	98
0	0	0	0
0	0	0	0
0	0	0	0
0	0	0	0
0	0	0	0
0	0	0	0
104	0	0	0
0	0	0	0
0	0	0	0
0	0	0	0
0	0	0	0
0	0	0	0
0	0	0	0
208	331	296	504
0	0	0	0
0	0	0	0
0	0	26	41
0	0	375	0
29	0	183	210
0	0	0	0
86	27	18	0
0	0	0	0
0	0	0	0
0	0	0	0
0	0	0	0
0	0	0	0
0	0	0	0
0	0	0	0
0	0	0	0
0	0	0	0
0	0	0	0
108	0	190	0
194	0	301	375
128	0	313	0
420	235	1041	591
859	146	1330	553
0	0	0	0
0	0	0	0
0	0	0	0
0	0	0	0
392	123	216	84
0	0	0	0
0	0	0	0
0	0	0	0
0	0	0	0
0	0	0	0
0	0	0	56
149	0	206	80
0	0	0	0
0	0	0	0
0	0	0	0
1430	610	1976	1657
0	0	0	0
0	0	0	0
89	0	125	49
0	0	0	0
0	0	0	0
0	0	102	40
0	0	0	0
0	0	0	0
0	0	0	0
0	0	0	0
0	0	0	0
0	0	178	70
0	0	0	0
0	0	0	0
0	0	0	0
0	0	0	0
0	0	0	0
0	0	54	42
486	159	931	626
0	0	0	0
0	0	0	0
0	0	61	0
0	0	15	0
0	0	0	0
0	0	0	0
0	0	0	0
0	0	0	0
0	0	0	0
333	0	150	0
0	0	0	0
0	0	0	0
0	21	28	0
0	0	0	0
0	0	0	0
0	0	0	0
0	0	0	0
0	0	0	0
0	0	0	0
0	0	0	0
0	0	0	0
0	0	0	0
0	0	0	0
0	0	0	0
37	0	461	0
0	0	0	0
0	0	28	0
0	19	0	0
0	0	0	0
0	0	104	0
0	0	0	0
0	0	0	0
0	0	89	56
0	0	0	0
0	0	0	44
0	0	34	0
0	0	0	0
0	0	0	0
0	0	0	0
0	0	0	0
0	0	0	0
0	0	0	0
0	0	0	0
0	0	0	0
0	0	0	0
0	0	0	0
127	0	0	364
0	0	0	0
0	0	0	0
0	0	0	0
0	0	0	0
0	0	0	0
0	0	0	0
74	0	0	0
0	0	0	0
168	34	115	75
0	0	0	0
0	0	0	0
0	0	0	0
0	0	0	0
0	0	0	0
0	0	0	0
0	0	0	0
113	0	89	70
88	20	561	145
0	0	0	0
0	0	0	0
0	0	0	0
0	0	0	0
0	0	0	0
0	0	0	0
850	431	614	694
0	0	0	0
0	0	0	167
0	0	0	0
0	0	0	58
0	0	0	0
0	0	0	167
5612	1725	6118	3186
5038	1497	6118	3186
110	87	403	270
110	87	403	270
0	0	0	0
0	0	0	0
0	0	0	0
36	0	56	15
0	0	0	0
0	0	0	0
1031	831	998	130
1031	831	998	130
0	0	0	0
0	0	0	0
0	0	0	0
0	0	0	0
0	0	0	0
0	0	0	0
144	57	258	178
0	0	0	0
0	0	0	0
0	0	0	0
0	0	0	0
1628	0	808	730
0	0	0	0
0	0	49	0
0	0	0	0
0	0	0	0
44	101	39	39
0	0	0	0
0	0	0	0
78	42	0	129
0	0	0	0
26	10	65	53
1110	506	1951	563
0	0	0	0
0	0	0	0
416	0	561	0
129	0	0	0
445	0	561	0
538	125	142	83
0	0	0	0
0	17	0	0
0	0	0	0
0	0	0	0
684	161	1796	748
266	161	221	534
282	0	1027	0
0	0	0	0
149	79	156	0
149	79	156	0
0	0	0	0
808	107	1836	441
13922	6664	17311	12403
98	0	206	80
0	0	0	0
1873	694	4764	4077
0	0	0	97
75	0	0	0
0	0	0	0
0	0	0	0
273	0	668	75
0	0	0	0
133	0	139	87
0	0	0	0
0	0	0	0
0	7	0	0
0	0	0	0
0	0	0	60
0	0	0	60
0	0	0	0
0	0	0	0
0	0	0	0
215	171	407	318
0	0	0	0
74	0	0	0
0	0	0	0
0	0	0	0
0	0	0	0
0	6	75	23
0	0	44	0
0	0	44	0
0	43	58	13
0	0	0	0
0	0	0	0
0	0	0	0
0	0	0	0
0	0	0	0
0	0	0	0
0	0	0	0
0	0	0	0
91	105	0	0
0	0	0	0
172	0	60	0
0	0	0	0
0	0	0	59
136	0	0	0
0	0	0	0
0	0	0	0
1164	386	2414	968
577	259	652	263
41	0	0	0
3856	1096	4454	4279
107	0	0	0
1043	1007	2429	2328
0	0	0	0
129	0	74	207
0	0	0	0
0	0	0	0
0	0	0	0
1121	323	1609	1269
0	0	0	0
0	0	0	67
0	0	0	0
0	0	0	0
0	0	0	0
0	0	0	0
206	109	252	253
283	287	378	211
0	0	0	22
314	174	197	77
0	0	0	0
0	0	0	0
0	0	0	0
0	0	0	0
895	0	0	342
0	0	83	0
0	104	57	0
0	0	0	0
0	0	0	0
240	0	951	148
706	258	117	287
0	0	0	0
298	0	166	41
0	0	0	0
133	0	279	62
1734	564	2858	1356
288	0	212	163
0	0	0	0
0	27	81	111
0	0	0	0
0	0	0	0
0	0	0	0
0	0	0	0
60	16	94	0
32	26	67	158
0	0	0	0
314	174	197	77
21	17	0	17
0	0	0	0
0	0	0	0
0	0	0	0
0	0	0	0
0	0	0	0
0	0	0	0
0	0	0	0
0	0	0	0
0	140	0	0
0	0	0	0
28	22	0	0
0	0	0	0
202	43	368	221
0	0	0	0
67	0	422	336
202	0	0	233
0	0	0	0
0	0	0	0
0	0	0	0
0	0	0	0
0	0	0	0
0	0	0	0
0	0	0	0
0	0	0	0
0	0	0	0
0	0	0	0
179	14	301	323
0	0	0	61
0	0	0	0
159	207	409	124
133	0	325	0
0	0	0	0
645	245	322	680
154	0	216	126
0	0	0	0
249	191	147	151
22	0	149	28
21	0	0	34
156	0	125	243
22	0	149	28
22	0	0	0
0	0	0	0
0	0	0	0
[truncated: 1,185 more rows]

## Sheet: BACOVA_16days
770	527	853	2763
170	38	66	60
372	286	210	986
33	9	23	0
247	260	197	936
0	0	107	0
0	0	0	0
13	0	0	0
0	0	0	0
0	0	0	0
28	0	23	0
0	0	0	0
0	0	0	261
195	105	182	1042
0	0	0	0
959	909	444	1146
0	0	0	0
40	0	0	0
44	0	18	140
0	0	0	0
0	0	0	0
144	43	58	650
0	0	0	0
0	0	0	0
77	32	54	125
0	0	0	0
0	0	23	0
357	314	117	368
0	0	12	0
0	0	0	0
24	0	0	317
0	0	0	0
0	0	0	0
131	65	103	35
66	0	0	507
341	195	168	712
106	0	17	0
0	0	0	0
0	0	0	0
128	142	121	908
17	0	0	0
380	232	36	1471
0	0	66	65
0	0	61	1178
0	0	0	0
14	11	5	90
124	121	24	391
0	0	143	0
24	0	0	0
0	0	0	0
0	0	0	0
0	0	0	0
101	0	0	0
0	47	0	759
0	0	0	0
91	62	105	278
0	54	43	0
65	122	125	62
0	0	0	0
0	113	28	34
0	0	0	0
16	0	0	66
0	0	0	0
0	0	0	0
0	0	0	0
0	0	0	343
0	0	0	0
0	56	0	0
69	61	0	59
95	0	0	0
68	0	28	0
0	32	0	0
0	0	16	0
0	0	0	0
0	0	0	0
0	0	0	0
0	22	21	228
394	25	139	725
22	0	18	0
0	0	0	18
74	0	59	49
107	0	146	137
111	0	45	0
991	0	454	2274
413	250	127	1229
0	0	0	0
20	27	24	0
0	0	27	139
0	0	0	225
270	141	44	191
0	0	0	0
0	76	47	633
0	0	0	0
502	113	75	807
89	81	11	52
0	30	28	89
0	0	0	0
0	0	0	0
7	0	7	130
0	0	0	0
578	0	89	0
0	0	0	0
0	14	124	0
0	0	0	0
0	12	9	0
0	0	2	118
43	28	23	43
0	0	0	0
146	120	160	163
0	0	0	0
0	0	38	0
0	0	0	0
0	0	0	0
274	109	135	307
11217	5623	1208	6154
0	0	39	0
0	0	0	0
0	19	0	0
0	0	0	0
167	0	78	0
0	0	42	0
45	0	0	0
0	0	0	0
0	0	0	0
134	64	110	32
0	9	16	51
0	45	0	0
89	26	0	0
0	0	0	0
13	15	13	38
0	0	0	0
0	0	0	7
0	0	0	0
0	0	0	0
92	27	50	315
191	0	0	70
0	0	0	0
0	0	0	0
0	0	0	0
0	31	0	53
0	0	0	0
98	0	0	0
0	30	7	0
246	0	0	0
0	12	0	0
0	0	0	0
0	0	0	0
909	76	36	0
0	0	0	0
0	0	8	0
0	47	7	34
0	0	0	0
26	0	42	0
0	0	81	0
0	0	81	0
0	0	0	0
0	0	0	0
0	17	0	0
0	0	38	0
0	0	0	0
0	0	0	0
103	19	0	0
0	0	0	0
0	0	0	0
0	0	0	0
0	22	21	821
0	0	15	49
0	9	0	0
0	0	0	0
0	0	0	76
0	0	0	0
0	0	0	0
0	0	0	0
0	0	0	0
0	0	30	0
0	0	0	0
235	32	22	0
0	0	0	0
0	0	0	0
101	16	0	0
0	0	73	1025
0	93	189	270
0	0	0	0
177	104	241	569
0	0	0	0
0	0	0	0
128	38	35	0
54	59	83	303
0	0	0	0
0	0	11	0
0	0	0	0
0	0	0	0
0	0	0	8
0	0	0	249
0	0	0	100
0	13	6	0
0	0	0	0
0	0	0	0
70	0	10	0
0	0	0	0
0	0	0	0
51	45	21	230
0	0	17	0
0	0	0	0
0	102	0	324
0	0	0	0
0	0	0	0
0	109	0	223
112	0	0	57
0	0	0	0
53	9	0	0
121	45	67	100
0	0	0	9
0	0	0	0
0	0	0	0
0	0	0	0
0	97	90	0
29	121	47	0
144	102	0	74
0	0	0	27
0	0	0	0
0	0	0	0
58	57	58	0
0	0	0	0
13	0	0	374
54	36	22	278
52	138	0	871
0	0	0	0
0	0	0	0
0	0	0	0
0	0	0	0
0	0	0	0
0	0	0	0
339	56	79	0
0	0	0	0
905	800	379	1700
0	88	9	0
0	0	0	0
0	131	0	197
0	0	0	109
0	0	0	0
0	19	0	0
0	0	0	0
0	0	0	94
20	0	0	123
4	0	15	0
0	0	0	0
0	0	0	0
22	0	18	393
8	8	4	45
0	0	0	0
95	126	0	58
0	0	0	0
74	65	199	1450
0	0	0	0
0	0	0	0
130	93	75	279
159	121	47	0
0	0	29	0
0	5	0	0
0	0	0	0
194	371	107	269
245	10	0	0
25	66	0	0
0	0	0	0
0	138	162	0
130	0	0	371
0	0	0	0
0	0	1	0
0	0	0	0
201	29	28	598
15	14	0	0
224	71	33	386
0	34	32	67
0	0	0	0
752	622	2077	6696
0	0	0	0
78	0	0	0
256	146	0	0
0	0	0	0
0	0	0	0
0	0	0	0
60	0	0	0
0	0	0	0
104	0	0	0
0	0	0	0
0	0	0	0
0	0	0	0
0	0	0	0
0	0	0	0
0	0	0	82
0	0	0	0
0	0	0	0
353	42	460	184
190	34	0	784
0	0	0	0
237	382	321	2238
294	121	24	593
297	80	75	735
0	0	42	0
54	0	0	0
0	0	86	605
0	0	86	605
238	542	242	851
0	0	0	254
909	76	36	0
0	0	42	188
0	0	0	0
0	0	0	0
0	46	0	66
544	297	255	780
0	0	0	0
82	0	0	0
0	0	0	0
0	22	0	0
169	113	84	420
238	191	89	140
0	0	79	0
79	28	0	0
0	0	28	178
0	0	0	364
134	0	0	229
0	0	0	0
10	0	56	0
0	0	0	0
0	0	0	0
0	0	0	0
0	0	0	0
0	39	79	450
35	0	0	0
0	0	0	0
182	0	0	0
0	54	0	0
0	0	0	0
34	0	0	0
23	0	0	0
20	0	32	0
0	0	0	0
120	0	0	0
0	0	29	204
0	14	0	0
17	15	0	22
0	0	0	0
0	0	0	0
0	0	0	0
0	0	0	546
0	0	48	0
0	0	0	0
0	0	0	0
0	0	0	0
0	0	0	0
0	0	0	36
0	2	0	0
0	2	0	0
0	0	0	145
0	168	0	429
0	0	0	0
60	15	71	0
0	0	0	0
0	0	0	0
0	0	0	0
25	0	0	0
3	0	0	13
0	18	0	0
0	0	0	0
486	201	387	4015
0	0	0	0
76	0	0	0
288	111	56	567
0	0	0	0
0	23	0	0
0	0	0	0
0	14	11	343
128	0	91	547
97	40	0	0
0	0	0	0
0	0	0	0
0	0	0	0
0	0	0	0
0	0	0	0
0	0	22	0
87	0	74	0
0	0	0	0
0	0	0	0
83	0	214	436
0	0	0	0
53	0	0	0
0	0	0	0
114	0	21	0
71	31	0	0
0	0	0	332
0	0	0	332
0	0	0	0
42	0	0	0
0	0	0	0
266	670	512	1309
0	0	0	0
0	0	0	0
0	0	0	0
0	14	0	0
0	0	0	0
0	0	0	405
0	0	0	0
0	0	0	0
0	0	0	0
55	0	0	0
483	966	36	1695
0	0	104	0
74	0	59	49
66	0	0	0
0	0	0	0
0	0	0	0
24	63	0	0
0	76	106	371
38	17	5	37
0	0	0	0
0	0	0	0
20	0	32	0
0	0	17	19
45	0	0	0
0	0	0	0
78	20	55	0
0	0	0	0
0	0	0	0
0	0	0	0
0	0	0	0
33	0	17	0
122	92	49	0
0	0	0	0
0	0	0	0
31	0	0	20
128	0	53	2028
0	0	7	0
51	0	40	201
0	0	0	0
0	43	61	0
291	214	119	0
0	0	0	0
0	0	0	0
0	0	0	0
0	16	0	0
0	0	0	0
0	0	0	0
0	0	0	0
0	0	0	179
28	0	0	0
0	0	0	0
0	0	0	0
13	0	0	0
0	0	26	0
0	0	0	0
81	83	0	0
102	0	0	0
181	0	0	761
0	0	0	0
0	0	0	0
0	0	0	0
46	0	125	498
81	35	86	0
0	97	0	0
0	0	0	0
0	0	0	0
0	34	0	0
0	0	0	0
0	0	0	0
0	0	0	0
35	0	0	227
0	0	107	0
0	24	0	0
0	0	0	0
0	0	0	0
0	0	0	0
0	0	0	0
0	0	0	0
0	0	0	0
0	191	21	429
0	0	0	0
0	0	0	0
0	0	0	0
347	102	0	457
0	0	0	0
0	0	0	0
113	0	0	170
31	279	12	1072
0	0	0	0
0	0	0	0
0	0	48	0
0	0	0	0
38	17	5	37
0	0	0	0
0	0	8	0
0	0	4	0
0	0	0	155
0	0	0	0
0	0	0	76
0	131	162	28
0	0	0	0
0	0	0	0
0	0	0	201
0	0	31	0
0	18	0	0
0	0	0	0
0	0	0	0
51	39	55	0
0	0	20	288
0	0	0	0
0	0	0	0
0	0	0	0
0	0	0	0
28	49	50	36
27	0	0	0
0	0	0	0
0	0	0	0
12	0	0	160
0	0	0	0
0	0	0	0
0	0	0	0
0	0	0	0
0	0	0	0
0	0	0	0
0	0	23	0
0	0	0	263
44	0	36	0
0	32	0	0
0	0	0	0
0	19	0	55
0	37	69	393
0	0	55	58
0	0	0	0
0	0	0	0
24	0	0	0
0	0	0	0
34	0	0	0
0	0	0	0
0	0	0	0
0	0	0	0
397	123	79	1098
0	0	0	92
35	21	68	0
0	0	0	0
0	0	0	0
0	0	0	0
0	27	0	0
69	79	0	58
0	0	0	0
0	93	189	270
0	0	0	0
0	0	0	0
0	47	0	759
0	0	0	0
0	0	0	0
0	0	0	0
0	0	0	0
0	15	0	43
0	0	0	0
0	0	0	0
0	0	0	0
0	97	90	0
51	0	31	103
232	135	42	210
0	0	0	0
0	0	0	0
0	0	29	0
122	41	36	83
176	35	32	0
0	0	0	0
0	0	0	0
0	0	0	0
0	0	0	0
0	0	0	184
107	223	18	403
0	0	0	0
51	223	83	195
0	0	0	0
0	0	0	0
16	0	0	0
0	0	0	0
0	0	0	0
0	0	0	0
0	0	0	0
275	0	64	0
199	35	164	461
0	0	0	0
0	0	0	482
0	0	0	0
0	0	0	0
0	0	0	0
0	0	0	0
0	0	0	0
0	0	0	0
130	0	116	0
19	0	0	0
0	0	0	0
0	0	0	0
0	0	0	0
0	0	0	188
0	0	0	0
0	0	2	0
0	0	0	173
0	0	0	0
60	0	51	0
0	0	0	0
0	0	0	0
0	0	0	0
0	62	0	361
66	0	0	0
0	0	0	0
0	0	0	0
0	0	0	0
0	0	62	0
0	0	0	0
17	8	0	0
0	0	0	0
0	0	0	0
55	0	73	1050
0	0	0	0
0	0	0	120
0	0	0	0
0	0	0	0
0	0	0	0
0	0	0	0
0	0	31	0
0	0	0	0
387	144	277	171
0	0	0	0
0	0	0	0
0	44	0	173
0	0	0	0
0	0	0	0
0	0	0	0
502	113	75	807
0	0	0	0
297	97	526	920
0	0	0	0
0	0	0	0
0	0	0	0
53	0	0	0
0	0	0	0
27	0	0	0
0	0	0	0
0	0	0	0
79	38	78	253
0	0	0	0
0	0	0	0
0	0	0	102
0	0	0	0
0	0	10	0
0	0	0	0
0	0	0	0
0	0	0	0
0	97	90	0
0	0	0	0
0	0	0	0
180	249	28	675
0	0	0	0
52	138	0	871
40	0	0	0
0	0	0	0
0	0	0	0
0	0	1	0
0	0	0	0
0	0	0	0
0	0	50	0
0	0	0	0
0	0	0	0
40	0	0	0
50	0	64	53
0	0	0	0
0	0	0	0
0	0	0	0
0	0	0	0
0	0	0	0
42	0	0	300
0	0	0	0
0	0	41	301
0	0	0	0
61	0	27	156
0	0	0	0
142	0	0	0
0	0	0	0
0	0	0	0
0	0	0	0
0	0	0	0
0	31	0	122
0	0	0	0
38	0	0	0
44	0	36	0
0	0	0	0
0	0	0	53
0	0	58	0
0	0	0	0
0	0	0	0
0	0	0	0
0	0	0	0
0	0	0	0
0	29	0	0
0	0	0	0
0	0	0	0
0	0	0	0
17	45	0	0
0	0	0	0
0	0	21	0
0	0	0	0
74	0	59	49
0	0	0	0
0	0	0	0
0	0	0	0
41	18	0	0
43	38	0	0
26	0	0	0
0	0	0	0
0	0	0	0
18	2	8	40
0	0	0	0
0	0	0	0
20	0	50	336
0	0	0	0
0	0	0	0
0	0	0	0
0	0	66	0
206	0	0	0
0	0	0	0
0	0	0	149
0	0	0	0
0	0	16	30
0	0	11	0
0	0	0	0
0	0	0	0
0	0	0	0
0	0	0	0
0	0	0	0
991	0	454	2274
0	0	131	95
0	0	0	0
0	0	0	0
0	0	0	0
360	97	517	920
0	0	0	0
0	0	0	0
0	0	0	0
0	0	0	0
0	0	0	0
0	0	0	0
0	0	0	0
0	0	0	0
0	0	0	0
42	0	0	27
0	0	0	0
0	0	0	0
0	0	0	0
0	0	0	0
105	0	0	0
240	274	35	473
0	0	0	0
19	0	0	0
0	0	0	0
0	0	0	0
266	670	369	1309
33	0	9	0
0	0	0	0
0	0	0	0
203	45	0	243
0	0	0	0
0	0	0	0
0	0	0	0
0	0	0	0
0	0	0	0
0	0	0	0
53	24	0	0
0	0	0	0
0	0	0	0
0	0	0	0
0	0	0	0
0	0	0	0
0	0	0	0
0	0	0	0
0	0	0	0
0	0	0	42
0	0	0	0
0	0	0	0
0	0	0	0
0	0	0	0
16	0	0	0
0	0	0	0
24	0	0	0
0	0	0	0
0	0	0	0
0	0	0	0
0	0	0	0
0	0	0	0
23	0	0	0
0	0	0	0
0	0	0	0
0	0	0	0
0	0	0	0
0	0	0	0
0	0	0	0
0	0	0	0
0	0	0	0
0	0	0	0
6	0	0	0
0	0	0	0
0	0	0	0
0	0	0	0
127	0	0	0
0	0	0	0
0	0	0	0
11	0	0	84
269	32	0	83
0	0	0	0
0	0	0	0
0	0	0	0
0	0	0	0
107	126	88	0
0	0	0	0
0	0	0	0
0	0	0	0
0	0	0	0
0	0	0	0
0	0	0	0
0	0	0	0
206	0	255	80
0	0	0	0
313	78	240	251
0	0	0	0
0	26	0	0
0	0	0	0
0	0	0	0
0	0	0	0
0	0	0	0
0	0	117	551
0	0	14	331
0	0	0	0
0	0	0	0
0	0	0	157
0	0	0	0
0	0	0	0
0	0	0	0
0	0	0	0
0	0	0	0
0	0	0	0
0	0	0	0
0	0	0	0
0	0	0	0
102	223	114	195
246	18	0	344
0	0	0	0
166	0	0	0
0	0	0	0
0	0	0	0
0	0	0	0
0	0	0	0
0	0	0	0
38	0	0	0
50	0	34	599
0	0	0	0
0	0	0	0
259	244	287	941
0	0	0	0
0	0	0	0
0	0	0	0
57	0	0	0
0	48	0	0
0	0	0	112
0	0	0	0
0	0	0	0
233	154	0	0
168	70	0	0
483	966	36	1695
0	0	0	0
0	0	0	0
0	0	0	0
0	0	0	0
0	0	0	0
0	0	0	0
0	0	0	0
10874	5539	1020	3904
29	77	48	184
0	0	0	0
0	0	0	0
0	0	0	0
67	0	0	0
0	0	28	253
0	0	0	0
0	0	0	0
0	0	0	0
192	0	0	0
0	0	0	0
0	51	0	0
0	0	0	0
34	121	0	593
47	0	0	0
54	16	0	0
0	0	42	0
0	0	0	0
0	0	0	0
0	0	0	0
0	0	0	0
22	0	0	0
24	63	0	0
0	0	0	0
0	0	0	133
0	15	0	16
0	0	0	0
6	0	0	0
0	0	0	0
0	0	0	0
0	0	23	184
0	0	0	0
45	0	18	0
0	0	0	0
0	0	0	0
17	0	0	0
0	0	0	0
0	0	0	0
0	0	0	118
0	0	0	0
0	0	0	0
0	0	0	0
0	0	0	0
979	888	438	1749
32	0	0	0
0	0	0	0
0	0	0	0
0	0	0	0
0	0	0	0
0	0	0	0
0	0	0	405
0	0	0	0
0	0	0	96
0	0	0	0
0	0	0	0
0	0	0	0
0	0	0	0
145	0	0	37
0	0	0	0
0	0	0	0
0	0	0	0
0	0	0	0
0	0	0	68
0	0	0	0
0	23	0	50
0	124	0	600
0	0	0	0
0	0	0	0
0	0	0	0
0	14	0	0
0	0	0	0
0	0	0	0
70	0	0	90
0	0	0	546
0	0	0	0
0	0	0	0
0	0	0	0
0	0	0	0
0	0	0	0
0	0	0	0
0	0	0	107
0	0	0	0
0	210	0	891
0	0	0	0
53	0	0	0
320	134	88	206
0	0	0	0
0	0	0	0
0	0	0	0
0	0	0	0
0	0	22	0
0	0	0	0
0	0	0	0
0	0	0	0
0	0	0	0
0	0	0	0
0	0	0	0
0	0	0	546
0	0	0	0
0	0	0	0
0	0	24	0
271	0	0	0
0	0	0	0
0	0	0	0
0	0	0	0
0	0	0	0
11	0	0	0
0	0	0	0
0	0	0	0
0	0	0	0
0	0	0	0
0	0	0	0
0	0	0	0
0	0	0	0
0	0	0	0
0	0	0	0
0	0	0	0
0	0	0	244
0	0	0	0
0	0	0	0
0	0	0	0
0	0	0	0
0	0	0	0
0	0	0	0
0	0	0	0
0	0	0	0
0	0	0	0
0	0	0	0
0	0	0	0
0	0	0	0
0	0	0	0
0	0	0	0
0	0	0	0
0	0	0	0
0	0	33	0
0	0	74	87
0	0	0	0
12	0	0	0
0	0	0	0
0	0	0	0
0	24	0	0
0	175	228	0
0	0	0	0
0	0	0	0
49	0	0	316
0	0	0	0
105	0	0	0
0	0	0	0
0	3	0	56
0	0	0	0
0	0	0	0
0	0	0	281
0	0	0	0
0	0	0	0
0	32	0	0
0	0	0	0
0	0	0	0
0	0	0	0
0	0	0	0
0	97	90	0
0	0	0	0
0	0	0	0
0	0	0	0
0	0	0	0
0	0	0	0
0	29	0	0
0	13	0	0
238	191	89	140
238	191	89	140
0	0	176	1059
0	0	0	0
0	0	0	0
0	0	0	0
0	0	0	0
0	0	16	0
387	34	742	1051
236	0	225	178
144	43	58	650
227	196	30	1108
227	94	30	784
144	102	0	74
0	0	0	76
0	19	0	0
0	15	0	44
0	15	255	124
0	0	255	80
0	0	0	0
0	0	0	261
24	0	0	317
0	0	0	0
128	0	53	2028
0	0	0	0
413	250	127	1229
0	22	21	228
0	13	16	0
198	38	70	551
101	16	0	0
0	0	0	0
0	0	0	0
390	297	129	780
390	297	101	1515
134	0	0	229
0	0	0	0
0	0	0	0
79	154	184	541
745	527	736	1730
0	27	0	0
0	0	54	222
98	0	0	0
0	0	0	0
0	0	0	0
0	0	0	0
239	130	210	929
0	0	20	288
54	59	83	303
54	59	83	303
54	59	83	303
51	45	21	230
34	0	0	0
166	0	0	0
0	0	0	0
0	0	0	0
0	0	0	0
0	93	189	270
204	0	0	0
34	0	14	153
0	0	0	0
0	0	0	0
28	0	23	0
97	40	0	0
0	0	0	0
0	0	0	0
0	0	0	0
157	70	50	51
116	0	0	0
0	0	0	0
0	0	0	0
240	210	49	283
0	0	0	0
0	0	0	0
0	91	0	0
65	122	125	62
0	0	0	0
0	31	0	0
0	0	0	246
0	0	0	0
51	45	21	230
25	0	0	0
0	0	50	0
0	0	0	0
0	0	0	0
0	0	35	0
0	0	0	0
0	0	18	0
362	93	45	822
0	0	0	0
0	0	44	163
0	0	0	214
0	0	0	0
63	0	26	0
84	0	0	0
0	0	0	0
0	0	0	0
0	0	0	0
0	0	0	0
0	0	0	0
0	0	37	0
38	17	5	37
0	0	0	0
0	0	0	0
0	0	0	0
201	29	0	345
151	105	262	162
388	487	583	2400
0	0	78	0
0	0	0	0
0	30	0	0
0	0	0	0
0	34	31	0
0	0	0	0
0	0	0	0
0	0	0	0
0	0	0	0
0	0	0	0
0	0	0	0
0	0	0	0
0	0	0	0
0	0	0	0
0	0	0	0
0	0	0	0
0	0	0	0
0	0	0	0
0	0	0	0
0	0	0	63
0	0	0	0
11	0	0	0
0	0	60	150
0	0	19	150
0	0	0	0
0	0	0	0
0	0	0	0
0	0	0	0
0	0	0	0
0	0	0	0
49	0	0	66
0	0	0	0
0	0	0	0
0	0	0	0
15	0	12	59
0	0	0	0
0	0	0	0
0	0	0	0
0	0	0	0
0	0	0	0
0	0	0	0
0	0	0	0
0	0	0	0
0	0	0	0
0	0	0	0
0	0	0	0
0	0	0	0
0	0	23	0
0	0	0	0
0	0	0	0
0	0	0	0
177	104	241	569
0	0	0	0
26	0	0	0
24	0	0	0
0	0	0	0
0	0	0	0
0	0	0	0
0	0	0	0
0	0	0	0
0	0	0	0
0	0	0	0
0	0	0	0
0	0	0	0
17	0	0	0
0	0	0	0
0	0	0	0
46	0	0	0
0	0	0	0
0	0	0	0
0	0	0	0
0	0	78	0
0	0	78	0
35	0	0	0
0	0	0	0
39	260	93	663
0	0	0	0
0	0	0	0
0	0	0	0
0	0	0	0
344	0	70	130
0	0	0	0
0	0	0	0
0	0	0	0
0	0	0	0
0	0	66	0
0	0	0	0
0	0	0	0
0	0	0	0
0	0	0	0
0	0	0	0
108	32	0	0
0	0	0	0
114	48	159	0
0	0	0	0
0	0	0	0
0	0	0	0
0	0	0	0
0	0	0	0
0	0	0	0
0	0	0	0
0	0	0	0
121	70	37	0
0	0	0	0
0	0	0	0
0	0	0	0
0	0	0	0
0	0	0	0
23	30	17	0
284	0	0	0
0	0	0	0
0	0	0	0
54	19	0	56
0	0	0	0
0	0	0	0
0	0	0	0
0	0	0	0
0	0	0	0
0	0	0	0
0	0	0	0
0	0	0	0
0	0	0	0
42	0	0	0
0	0	8	0
0	0	104	0
0	0	104	0
0	0	0	0
0	0	107	0
0	0	107	0
0	0	38	0
0	79	0	127
0	0	0	0
0	0	0	0
0	0	0	0
0	0	0	0
0	0	0	0
0	0	0	0
0	0	0	0
0	0	0	0
54	382	321	1800
0	33	0	0
0	0	0	0
0	0	0	0
0	0	0	0
0	0	0	0
0	0	0	0
0	20	0	0
0	0	0	0
0	0	0	0
42	0	0	0
120	0	0	0
0	0	0	0
0	0	0	0
0	0	0	0
45	0	0	0
0	0	0	0
0	0	0	0
33	116	0	0
0	0	0	0
0	0	37	0
0	0	0	0
0	0	0	0
0	0	0	0
23	20	25	59
0	0	0	0
0	0	0	0
39	0	0	0
0	0	0	263
0	0	0	0
0	0	0	0
0	0	0	0
0	0	21	0
0	0	0	0
0	0	0	0
0	0	0	0
0	0	0	0
0	0	0	0
0	0	0	0
42	5	0	64
13	15	13	38
95	0	0	0
34	0	0	0
0	0	73	1025
0	0	55	216
0	0	0	0
131	65	103	35
0	0	0	0
0	0	0	0
0	0	0	0
68	0	56	0
119	21	0	245
0	0	0	0
0	131	0	0
0	0	0	0
72	31	0	0
0	0	0	0
0	0	0	0
0	0	0	0
0	16	15	186
0	0	0	0
0	0	0	0
192	0	0	0
0	0	0	163
0	0	0	0
0	0	0	0
0	0	0	0
0	0	0	158
223	0	0	298
0	0	0	0
0	0	0	0
0	0	0	0
0	0	0	0
0	0	0	0
0	0	0	0
0	0	0	0
0	0	0	0
0	0	0	0
0	0	0	0
0	0	0	0
0	0	0	0
0	0	18	0
47	0	0	0
0	0	0	0
0	0	0	0
0	0	0	0
63	0	0	489
0	0	0	0
10	60	158	185
0	0	0	0
0	0	0	0
0	0	0	0
0	0	0	0
0	0	0	0
0	0	0	0
0	0	0	0
0	0	0	93
0	0	0	0
0	0	0	0
0	0	0	0
0	0	0	0
0	0	0	0
0	0	0	0
0	0	0	0
0	0	0	0
0	0	55	0
0	0	0	0
0	0	0	0
0	0	0	0
0	0	0	0
0	0	0	0
0	0	0	0
92	0	90	0
0	0	0	0
0	0	0	0
0	0	0	0
0	0	0	0
0	0	0	0
0	0	0	0
0	0	0	0
0	0	0	0
0	0	0	0
0	0	66	86
0	0	0	0
0	0	0	0
0	0	0	0
0	0	0	0
0	0	0	0
0	15	0	0
0	0	0	0
153	0	0	0
0	0	0	0
0	0	0	0
0	0	0	0
0	0	0	0
0	0	0	0
0	0	0	0
523	152	284	1009
0	0	0	111
0	0	0	21
0	0	0	0
0	0	0	0
0	0	0	0
0	0	0	0
0	0	0	0
0	0	0	0
0	0	0	0
0	0	0	0
0	0	0	0
0	0	0	0
0	0	0	0
0	0	0	0
0	0	0	0
0	0	0	0
0	0	0	0
0	0	0	0
0	0	0	0
0	0	0	0
0	0	0	0
0	0	0	0
0	0	0	0
0	0	0	0
0	0	48	0
0	0	0	0
0	0	0	0
0	0	0	0
0	0	0	0
0	0	0	0
0	0	0	0
0	0	0	0
53	0	0	159
124	121	24	391
580	450	161	1510
124	121	24	391
0	0	0	0
0	0	0	0
0	0	0	0
74	65	199	1450
74	65	199	1450
74	65	199	1450
74	65	199	1450
0	0	0	0
0	0	0	0
0	0	0	0
86	38	70	551
0	0	0	0
0	0	66	0
182	0	15	249
0	0	0	0
0	0	0	0
0	0	0	0
0	0	0	0
0	0	0	0
0	0	0	0
0	0	0	0
239	53	201	539
172	65	64	253
0	0	0	0
0	0	0	0
10837	5514	1020	3819
0	0	0	0
0	0	0	0
0	0	0	0
0	0	0	0
0	0	0	0
0	0	0	0
0	0	0	0
0	0	0	0
0	0	0	0
0	0	0	0
0	0	0	0
0	115	88	187
0	0	0	0
0	45	44	206
0	0	0	0
0	0	0	0
0	0	0	0
0	0	0	0
0	0	0	0
256	146	0	0
0	0	0	0
0	0	0	0
0	0	0	0
0	0	0	0
0	0	0	0
256	146	0	0
256	146	0	0
256	146	0	0
0	0	0	0
0	0	0	0
0	0	0	0
0	0	0	0
0	0	0	0
130	0	34	0
0	0	0	0
0	0	0	0
0	0	0	0
0	0	0	0
0	0	0	0
0	0	0	0
0	0	0	434
0	0	0	0
0	0	0	0
0	0	0	0
0	0	0	0
0	0	0	0
0	0	0	0
0	0	0	0
0	0	0	0
0	0	0	0
0	0	0	0
0	0	0	0
0	0	0	0
0	0	0	0
6	0	0	0
0	0	0	0
0	0	0	0
0	0	124	0
0	0	0	0
0	36	0	0
52	138	0	871
52	138	0	871
0	0	0	0
52	138	0	871
353	42	460	184
0	0	0	0
26	47	0	0
82	0	0	0
0	0	0	0
0	0	0	82
0	19	0	55
0	0	0	0
0	0	0	0
0	0	0	0
0	0	0	0
0	0	0	0
114	0	0	189
0	0	0	0
0	0	0	0
0	0	0	0
0	0	117	551
0	0	0	0
0	0	0	0
0	0	0	0
0	0	0	0
0	0	0	0
0	0	0	0
0	0	0	0
0	0	0	0
0	18	16	333
0	18	16	333
0	0	0	0
0	0	0	0
0	0	0	0
0	0	0	0
0	0	0	0
0	0	0	0
0	0	0	0
0	62	0	45
0	0	0	0
0	0	0	0
0	0	0	0
0	0	0	0
0	44	0	792
0	0	0	0
0	0	0	0
16	0	0	0
0	0	0	0
275	0	64	0
29	0	0	0
0	0	0	0
0	0	0	0
63	0	0	0
63	0	0	0
0	0	0	0
0	0	0	0
0	0	0	0
0	0	0	0
0	0	137	0
0	0	0	0
0	0	0	0
0	0	0	0
0	0	0	0
0	0	0	0
0	0	0	0
0	0	0	0
0	0	0	0
0	0	0	0
0	0	0	0
35	0	0	0
0	0	0	0
0	0	0	0
0	0	0	0
0	0	0	0
0	0	0	0
0	0	0	0
0	0	0	0
0	0	0	0
0	0	0	787
0	0	0	0
0	0	0	0
0	0	0	0
0	24	0	0
0	0	0	0
0	0	0	0
0	0	0	0
0	0	0	0
0	0	0	0
0	0	0	0
0	0	0	0
0	0	0	0
0	0	0	0
0	0	0	0
0	0	0	0
0	0	0	0
0	0	0	0
0	0	0	0
0	0	0	0
0	0	0	0
0	0	0	0
0	0	0	0
0	0	0	0
0	0	0	0
0	0	0	0
0	0	0	0
0	0	0	0
0	0	0	0
0	0	0	0
0	0	0	0
0	0	0	0
0	0	0	0
0	0	0	0
0	0	0	0
0	0	0	0
0	0	0	0
0	0	0	0
0	0	0	0
0	0	0	0
0	0	0	0
0	0	0	0
0	0	0	0
0	0	0	0
0	0	0	53
0	0	0	0
0	0	0	0
0	18	0	0
0	0	0	186
0	0	16	0
0	0	0	0
14	0	23	0
0	0	0	0
0	0	0	0
0	0	0	0
0	0	0	0
0	0	0	0
0	0	0	0
79	0	32	0
0	0	0	0
0	0	0	0
0	0	0	0
0	0	0	0
0	0	0	0
0	0	0	438
376	16	127	913
99	63	14	106
0	0	0	0
0	0	0	0
0	0	0	0
0	0	0	0
0	0	0	482
0	0	0	0
0	0	0	0
0	0	0	0
0	0	0	0
0	0	0	0
0	0	0	0
0	0	0	0
0	0	0	0
0	0	0	0
0	0	0	0
394	25	139	725
0	0	0	0
0	0	0	0
0	42	0	0
0	0	0	0
0	0	0	0
0	0	16	0
0	0	0	0
0	0	0	0
0	0	0	0
0	0	0	0
0	0	0	0
0	0	0	413
0	0	0	0
0	0	0	0
0	0	0	0
0	0	0	0
0	0	0	0
0	0	0	0
194	0	27	336
0	0	0	0
0	0	0	0
0	0	0	0
0	0	0	0
0	0	0	0
0	0	0	0
0	0	0	0
0	0	0	0
0	0	0	0
0	0	0	495
0	23	0	0
0	0	0	0
0	0	0	0
0	0	0	0
0	0	0	0
0	0	0	0
0	9	0	0
0	0	0	0
0	0	0	0
0	0	0	0
0	0	0	0
0	0	0	0
0	0	0	0
0	0	0	0
0	0	33	0
0	0	0	0
0	0	23	223
0	0	0	0
0	0	0	0
0	0	0	0
0	0	0	0
0	0	0	0
0	0	79	0
0	0	0	0
0	0	0	0
0	0	0	0
0	0	0	0
0	0	0	0
0	0	0	0
0	0	0	0
0	0	0	0
0	0	0	0
0	0	0	0
0	0	0	0
0	0	0	0
0	0	0	0
0	0	0	528
0	0	0	0
0	0	0	0
0	0	0	0
0	0	0	0
0	0	0	0
0	0	0	0
150	0	0	0
0	0	0	0
0	0	0	0
0	0	0	0
0	0	0	0
0	0	0	0
0	0	0	0
0	0	0	0
0	0	0	0
0	0	0	0
0	0	0	0
61	13	8	161
0	0	0	0
0	0	0	0
0	0	0	0
0	0	0	0
0	0	0	0
0	0	0	0
91	19	36	0
0	0	0	0
165	0	0	0
0	0	0	0
0	0	31	0
0	0	0	0
165	0	0	0
927	648	299	727
927	648	172	727
133	156	0	57
133	156	0	57
0	0	0	0
0	0	0	0
0	0	0	0
0	0	0	0
0	0	0	0
0	0	0	0
128	0	53	2028
128	0	53	2028
0	0	0	0
0	0	0	0
0	0	0	0
0	0	0	0
0	0	0	0
0	0	0	0
233	154	0	0
0	0	0	0
0	0	0	0
0	0	0	0
0	0	0	0
66	29	111	630
0	0	0	0
0	0	0	0
0	0	0	0
0	0	0	0
0	0	0	253
0	0	0	0
0	0	0	0
0	0	0	0
0	0	0	0
42	0	0	0
63	0	264	2425
0	0	0	0
0	0	0	0
192	0	0	0
0	0	0	0
192	0	0	0
0	0	0	0
0	0	0	0
0	0	0	0
0	0	0	0
0	0	0	0
387	144	277	171
316	110	120	0
134	0	0	229
0	0	0	0
0	0	0	0
0	0	0	0
0	0	0	0
326	0	0	420
2711	1364	3704	11941
0	0	0	0
0	0	0	0
745	569	736	1730
0	0	0	0
0	0	0	391
0	0	0	0
0	0	0	0
0	0	0	0
0	0	0	0
0	0	0	0
0	0	0	0
0	0	0	0
0	0	0	0
0	0	0	0
0	0	0	0
0	0	0	0
0	0	0	0
0	0	0	0
0	0	0	0
0	0	0	246
0	0	0	0
150	0	0	0
0	0	0	0
0	0	0	0
0	0	0	0
0	0	0	44
0	91	0	0
0	91	0	0
0	19	14	55
0	0	0	0
0	0	0	0
0	0	0	0
0	0	0	0
0	0	0	0
0	0	0	0
0	0	0	0
0	0	0	0
0	0	0	0
0	0	0	0
0	0	0	0
0	0	0	0
0	0	0	0
0	0	0	0
0	0	0	0
0	0	0	0
177	118	0	250
163	223	83	195
0	0	0	0
1224	554	986	1777
0	0	0	0
97	183	314	912
0	0	0	0
0	0	41	301
0	0	0	0
0	0	0	0
0	0	0	0
520	144	28	472
0	0	0	0
0	0	0	0
0	0	0	0
0	0	0	0
0	0	0	0
0	0	0	0
28	49	50	36
42	0	0	0
0	0	0	0
177	22	42	163
0	0	0	0
0	0	0	0
0	0	0	0
0	0	0	0
289	85	119	0
0	0	0	0
0	39	0	0
0	0	0	0
0	0	0	0
0	168	20	717
79	38	61	1431
0	0	0	0
0	0	66	0
0	0	0	0
153	0	0	0
433	329	137	1119
0	39	0	214
0	0	0	0
191	0	0	70
0	0	0	0
0	97	0	0
0	97	0	0
0	0	0	0
48	28	26	145
0	0	0	0
0	0	0	0
177	22	42	163
0	0	0	0
0	0	0	0
0	0	0	0
0	0	0	0
0	0	0	0
0	0	0	0
0	0	0	0
0	0	0	0
0	0	0	0
0	0	0	0
0	0	0	0
0	0	74	87
0	0	0	0
22	0	18	393
0	0	0	0
0	0	0	713
137	0	0	119
0	0	0	0
0	0	0	0
0	0	0	0
0	0	0	0
0	0	0	0
0	0	0	0
0	0	0	0
0	0	0	0
0	0	0	0
0	0	0	0
72	77	0	0
260	0	24	0
0	0	0	0
44	28	0	170
0	0	23	0
0	0	0	0
0	44	0	792
0	0	0	0
0	0	0	0
40	58	24	198
0	0	0	0
0	30	14	0
45	0	0	0
0	0	0	0
0	0	0	68
0	0	0	0
0	0	0	0
[truncated: 1,185 more rows]

[truncated: 57 more sheets: BACOVA_27days, BACOVA_29days, BACOVA_30days, BACUNI_13days, BACUNI_15days, BACUNI_16days, BACUNI_27days, BACUNI_29days, BACUNI_30days, BDI_13days, BDI_15days, BDI_16days, BDI_27days, BDI_29days, BDI_30days, BT_13days, BT_15days, BT_16days, BT_27days, BT_29days …]
